# Supplementary material for: Glycolytic flux-signaling controls mouse embryo mesoderm development
Source: eLife. 2022 Dec 5;11:e83299. doi: 10.7554/eLife.83299 (PMC9771359; doi:10.7554/eLife.83299)
Supplement: Supplementary file 1. [file elife-83299-supp1.xlsx]

## Sheet: DEG_Tg_DOWN _p0.01
row	baseMean	log2FoldChange	lfcSE	stat	pvalue	padj	symbol
ENSMUSG00000035165	1071.36	-2.63392	0.195712	-13.4581	2.75841e-41	1.19611e-37	Kcne3
ENSMUSG00000048450	496.519	-2.53661	0.211754	-11.9791	4.57305e-33	1.58639e-29	Msx1
ENSMUSG00000086126	1836.01	-2.08707	0.179463	-11.6295	2.91635e-31	8.43068e-28	Evx1os
ENSMUSG00000032698	4354	-2.15551	0.190332	-11.325	9.86801e-30	2.44515e-26	Lmo2
ENSMUSG00000019890	105.441	-5.8572	0.556985	-10.5159	7.29763e-26	1.58222e-22	Nts
ENSMUSG00000068302	564.092	-2.00409	0.202347	-9.90423	3.99048e-23	7.69055e-20	Noto
ENSMUSG00000042369	557.974	-2.55663	0.265833	-9.61743	6.74991e-22	1.17077e-18	Rbm45
ENSMUSG00000051354	257.566	-2.33993	0.250215	-9.35168	8.62666e-21	1.24691e-17	Samd3
ENSMUSG00000026497	254.606	-2.54814	0.278263	-9.15732	5.32036e-20	6.59155e-17	Mixl1
ENSMUSG00000064165	70.0383	-4.07367	0.449685	-9.05894	1.31728e-19	1.52322e-16	Krt39
ENSMUSG00000001946	246.535	-2.08965	0.23332	-8.95619	3.36084e-19	3.64336e-16	Esam
ENSMUSG00000021458	9871.33	-1.59252	0.17937	-8.87839	6.78323e-19	6.92089e-16	Aopep
ENSMUSG00000075304	623.761	-2.0867	0.235424	-8.86358	7.74883e-19	7.46685e-16	Sp5
ENSMUSG00000000489	168.469	-2.55316	0.288526	-8.84899	8.83132e-19	8.06207e-16	Pdgfb
ENSMUSG00000025352	1953.69	-1.73563	0.204776	-8.47577	2.33529e-17	1.92884e-14	Gdf11
ENSMUSG00000019880	4952.98	-1.56569	0.185961	-8.41949	3.78116e-17	2.9811e-14	Rspo3
ENSMUSG00000005503	649.721	-1.76556	0.212323	-8.31543	9.14222e-17	6.89443e-14	Evx1
ENSMUSG00000021071	629.551	-1.69469	0.205521	-8.24581	1.64047e-16	1.18558e-13	Trim9
ENSMUSG00000027800	63.2166	-3.5935	0.444278	-8.08842	6.04432e-16	4.03226e-13	Tm4sf1
ENSMUSG00000027004	1390.63	-1.60862	0.199296	-8.07151	6.94368e-16	4.46067e-13	Frzb
ENSMUSG00000021567	847.821	-1.39403	0.188287	-7.40374	1.32402e-13	7.40813e-11	Nkd2
ENSMUSG00000033278	584.069	-1.56711	0.215925	-7.25766	3.93857e-13	2.13483e-10	Ptprm
ENSMUSG00000041378	333.62	-1.86597	0.261126	-7.14585	8.94379e-13	4.64393e-10	Cldn5
ENSMUSG00000022899	123.606	-2.14059	0.299659	-7.14343	9.10313e-13	4.64393e-10	Slc15a2
ENSMUSG00000024868	866.251	-1.65434	0.234126	-7.06601	1.59451e-12	7.68243e-10	Dkk1
ENSMUSG00000090698	242.953	-1.88927	0.267969	-7.05035	1.78472e-12	8.3665e-10	Apold1
ENSMUSG00000036943	1685.65	-1.42324	0.202787	-7.01841	2.244e-12	1.02427e-09	Rab8b
ENSMUSG00000031465	96.3866	-2.23589	0.319965	-6.98792	2.7899e-12	1.24079e-09	Angpt2
ENSMUSG00000085412	226.851	-2.34886	0.337513	-6.95932	3.41921e-12	1.48266e-09	Halr1
ENSMUSG00000031523	754.376	-1.69695	0.245426	-6.91429	4.70197e-12	1.97594e-09	Dlc1
ENSMUSG00000001504	269.349	-1.80082	0.260541	-6.91182	4.78463e-12	1.97594e-09	Irx2
ENSMUSG00000073940	457.488	-2.40857	0.350632	-6.86923	6.45485e-12	2.60371e-09	Hbb-bt
ENSMUSG00000040387	492.9	-1.8505	0.270463	-6.84195	7.81242e-12	3.07969e-09	Klhl32
ENSMUSG00000029924	1771.82	-1.24812	0.182617	-6.83462	8.2223e-12	3.16924e-09	Slc37a3
ENSMUSG00000038151	86.9351	-2.20889	0.324986	-6.79687	1.06919e-11	4.03153e-09	Prdm1
ENSMUSG00000021186	273.003	-1.66086	0.245065	-6.77722	1.22506e-11	4.46041e-09	Fbln5
ENSMUSG00000048065	297.959	-2.1415	0.320383	-6.68419	2.32209e-11	8.21971e-09	Cyb5r2
ENSMUSG00000013089	1382.69	-1.29256	0.194987	-6.62892	3.38156e-11	1.15006e-08	Etv5
ENSMUSG00000031026	118.406	-2.28298	0.352691	-6.47303	9.60559e-11	3.20402e-08	Trim66
ENSMUSG00000020256	485.936	-1.73152	0.270613	-6.39852	1.56893e-10	5.13453e-08	Aldh1l2
ENSMUSG00000031326	4861.56	-1.46555	0.230667	-6.35354	2.1041e-10	6.75846e-08	Cdx4
ENSMUSG00000039804	550.284	-1.61058	0.254678	-6.32399	2.54891e-10	7.94342e-08	Ncoa5
ENSMUSG00000032899	58.5585	-2.93252	0.46445	-6.31395	2.72003e-10	8.27701e-08	Styk1
ENSMUSG00000027314	92.607	-2.06813	0.328583	-6.29409	3.09214e-10	9.00339e-08	Dll4
ENSMUSG00000027333	423.618	-1.34962	0.214464	-6.29297	3.11446e-10	9.00339e-08	Smox
ENSMUSG00000020423	2135.84	-1.22749	0.195988	-6.26311	3.77381e-10	1.07306e-07	Btg2
ENSMUSG00000031297	2293.44	-1.30594	0.209536	-6.23255	4.58889e-10	1.26928e-07	Slc7a3
ENSMUSG00000030717	1027.06	-1.60563	0.257651	-6.23183	4.61024e-10	1.26928e-07	Nupr1
ENSMUSG00000041695	89.9242	-2.46043	0.395813	-6.21613	5.09559e-10	1.38099e-07	Kcnj2
ENSMUSG00000036501	415.333	-1.45969	0.235157	-6.2073	5.39019e-10	1.43835e-07	Fam13b
ENSMUSG00000022346	524.05	-1.35637	0.218714	-6.20158	5.5898e-10	1.46902e-07	Myc
ENSMUSG00000016921	5468.66	-1.22384	0.198727	-6.15838	7.34916e-10	1.90255e-07	Srsf6
ENSMUSG00000043289	143.395	-1.89646	0.31005	-6.11662	9.55828e-10	2.40273e-07	Mei4
ENSMUSG00000032135	113.771	-1.71268	0.281009	-6.09476	1.09598e-09	2.71569e-07	Mcam
ENSMUSG00000085696	2213.21	-1.1832	0.195523	-6.05145	1.43551e-09	3.50688e-07	Hoxaas3
ENSMUSG00000040121	130.649	-1.72302	0.285593	-6.03314	1.60805e-09	3.87385e-07	Rep15
ENSMUSG00000020303	502.725	-1.50434	0.251682	-5.97714	2.27089e-09	5.39569e-07	Stc2
ENSMUSG00000027435	195.482	-1.61353	0.273296	-5.90396	3.5487e-09	8.09898e-07	Cd93
ENSMUSG00000038539	123.336	-2.12826	0.361911	-5.88061	4.0876e-09	9.20771e-07	Atf5
ENSMUSG00000020608	32023.4	-1.43561	0.244338	-5.87551	4.21534e-09	9.37374e-07	Smc6
ENSMUSG00000046380	127.401	-1.72223	0.295956	-5.81919	5.91327e-09	1.2508e-06	Jrk
ENSMUSG00000001918	682.971	-1.40526	0.243291	-5.77602	7.6486e-09	1.59837e-06	Slc1a5
ENSMUSG00000030170	575.445	-1.17461	0.203951	-5.75928	8.44717e-09	1.74424e-06	Wnt5b
ENSMUSG00000050953	10312.4	-0.947859	0.16604	-5.70863	1.13891e-08	2.27062e-06	Gja1
ENSMUSG00000029648	185.896	-1.42139	0.249662	-5.69326	1.24635e-08	2.45659e-06	Flt1
ENSMUSG00000029923	345.712	-1.24472	0.218798	-5.68892	1.27845e-08	2.49153e-06	Rab19
ENSMUSG00000033578	251.142	-1.45183	0.256994	-5.64928	1.61117e-08	3.09068e-06	Tmem35a
ENSMUSG00000075588	153.51	-1.54548	0.273625	-5.64818	1.62151e-08	3.09068e-06	Hoxb2
ENSMUSG00000017652	1222.7	-1.17654	0.208443	-5.64444	1.65717e-08	3.09071e-06	Cd40
ENSMUSG00000056498	37.2167	-2.74044	0.485455	-5.6451	1.65085e-08	3.09071e-06	Tmem154
ENSMUSG00000000317	221.09	-1.70479	0.30357	-5.61581	1.95648e-08	3.61012e-06	Bcl6b
ENSMUSG00000037347	519.191	-1.21298	0.217189	-5.58493	2.33793e-08	4.13789e-06	Chst7
ENSMUSG00000024349	781.595	-1.22343	0.218993	-5.58661	2.31541e-08	4.13789e-06	Sting1
ENSMUSG00000027660	1095.67	-1.14744	0.205711	-5.57793	2.43394e-08	4.26432e-06	Skil
ENSMUSG00000041961	262.083	-1.30326	0.233893	-5.57204	2.5178e-08	4.36713e-06	Znrf3
ENSMUSG00000047786	1191.79	-1.04803	0.190078	-5.51368	3.51411e-08	5.97572e-06	Lix1
ENSMUSG00000039167	87.5224	-1.96355	0.356507	-5.50775	3.63442e-08	6.02414e-06	Adgrl4
ENSMUSG00000002486	424.566	-1.2143	0.220381	-5.51002	3.58798e-08	6.02414e-06	Tchp
ENSMUSG00000019987	827.714	-1.09889	0.199538	-5.50716	3.64678e-08	6.02414e-06	Arg1
ENSMUSG00000025616	2672.76	-1.05727	0.192313	-5.49767	3.84835e-08	6.23828e-06	Usp16
ENSMUSG00000022484	1222.61	-1.04039	0.189637	-5.48623	4.10599e-08	6.59429e-06	Hoxc10
ENSMUSG00000037754	153.328	-1.43113	0.262541	-5.45105	5.00722e-08	7.89548e-06	Ppp1r16b
ENSMUSG00000054944	27.5944	-2.9799	0.54853	-5.43252	5.55649e-08	8.52897e-06	5330416C01Rik
ENSMUSG00000025007	2970.43	-1.00688	0.186463	-5.39989	6.66807e-08	9.97049e-06	Aldh18a1
ENSMUSG00000054136	121.372	-1.73522	0.321826	-5.39179	6.97603e-08	1.02542e-05	Adm2
ENSMUSG00000054435	148.355	-1.40074	0.260424	-5.37868	7.5032e-08	1.09364e-05	Gimap4
ENSMUSG00000026675	604.99	-1.07474	0.200002	-5.37366	7.71532e-08	1.11518e-05	Hsd17b7
ENSMUSG00000027102	1111.76	-1.07855	0.201076	-5.36389	8.14491e-08	1.14856e-05	Hoxd8
ENSMUSG00000049604	4944.25	-1.51748	0.283659	-5.34968	8.811e-08	1.23247e-05	Hoxb13
ENSMUSG00000032327	188.932	-1.41565	0.264909	-5.34392	9.09577e-08	1.26213e-05	Stra6
ENSMUSG00000056501	124.294	-1.84479	0.346193	-5.3288	9.88645e-08	1.36096e-05	Cebpb
ENSMUSG00000040389	237.93	-1.34724	0.253418	-5.31629	1.05903e-07	1.44637e-05	Wdr47
ENSMUSG00000014704	296.519	-1.2353	0.232776	-5.30683	1.11548e-07	1.51157e-05	Hoxa2
ENSMUSG00000050147	37.4379	-2.88031	0.543138	-5.30309	1.13859e-07	1.53092e-05	F2rl3
ENSMUSG00000015942	102.113	-1.65422	0.312219	-5.29828	1.16901e-07	1.54782e-05	Gtf2ird2
ENSMUSG00000019789	250.835	-1.75099	0.330443	-5.2989	1.165e-07	1.54782e-05	Hey2
ENSMUSG00000031700	3685.96	-1.25589	0.239179	-5.25081	1.51428e-07	1.98979e-05	Gpt2
ENSMUSG00000020601	565.533	-1.08798	0.209514	-5.19287	2.07072e-07	2.62166e-05	Trib2
ENSMUSG00000030022	585.288	-1.53919	0.296498	-5.19123	2.08907e-07	2.62572e-05	Adamts9
ENSMUSG00000040620	524.671	-1.06253	0.204746	-5.18951	2.10853e-07	2.63111e-05	Dhx33
ENSMUSG00000020717	298.619	-1.13541	0.21895	-5.18572	2.1518e-07	2.66593e-05	Pecam1
ENSMUSG00000026235	1465.8	-1.13696	0.219937	-5.16948	2.34748e-07	2.88773e-05	Epha4
ENSMUSG00000034738	95.3801	-1.55311	0.301745	-5.14708	2.64577e-07	3.18686e-05	Nostrin
ENSMUSG00000034667	1578.81	-1.10839	0.215316	-5.14771	2.63689e-07	3.18686e-05	Xpot
ENSMUSG00000044707	711.089	-1.05544	0.206394	-5.11369	3.15926e-07	3.75325e-05	Ccnjl
ENSMUSG00000112117	59.2882	-2.17165	0.42544	-5.10448	3.31703e-07	3.88742e-05	Rmst
ENSMUSG00000021193	5332.94	-0.93163	0.183688	-5.07181	3.94056e-07	4.55661e-05	Pitrm1
ENSMUSG00000024816	782.813	-1.05629	0.208679	-5.06177	4.15374e-07	4.73991e-05	Frmd8
ENSMUSG00000025991	26.721	-3.01761	0.597951	-5.04658	4.49794e-07	5.03334e-05	Cps1
ENSMUSG00000047821	171.277	-1.57689	0.312353	-5.04841	4.45493e-07	5.03334e-05	Trim16
ENSMUSG00000038172	232.823	-1.23611	0.246062	-5.02355	5.07262e-07	5.60411e-05	Ttc39b
ENSMUSG00000023034	87.932	-1.5471	0.308416	-5.01627	5.26841e-07	5.78358e-05	Nr4a1
ENSMUSG00000031871	170.682	-1.35752	0.271043	-5.00851	5.48541e-07	5.98393e-05	Cdh5
ENSMUSG00000044338	264.871	-1.08659	0.217225	-5.00215	5.66932e-07	6.1459e-05	Aplnr
ENSMUSG00000000753	1463.85	-0.953712	0.190894	-4.99602	5.85247e-07	6.30504e-05	Serpinf1
ENSMUSG00000037169	940.98	-1.16463	0.233228	-4.99352	5.92889e-07	6.34793e-05	Mycn
ENSMUSG00000047002	3348.41	-3.14207	0.632682	-4.96627	6.82532e-07	7.13164e-05	Msgn1
ENSMUSG00000062960	295.754	-1.10794	0.224851	-4.92743	8.33166e-07	8.55104e-05	Kdr
ENSMUSG00000026921	931.451	-1.00159	0.203698	-4.91705	8.78575e-07	8.91162e-05	Egfl7
ENSMUSG00000085355	80.501	-1.80292	0.366774	-4.91562	8.85003e-07	8.92464e-05	3010003L21Rik
ENSMUSG00000037608	6674.15	-0.824079	0.169381	-4.86523	1.14323e-06	0.000111401	Bclaf1
ENSMUSG00000023883	2289.66	-1.04516	0.214918	-4.86307	1.15576e-06	0.000111993	Phf10
ENSMUSG00000010755	3864.33	-1.02108	0.210171	-4.85833	1.18377e-06	0.00011407	Cars
ENSMUSG00000043962	2432.97	-0.87776	0.180851	-4.85349	1.21307e-06	0.000115609	Thrap3
ENSMUSG00000030047	65.6422	-1.69974	0.350316	-4.85202	1.2221e-06	0.000115832	Arhgap25
ENSMUSG00000068327	56.367	-1.89836	0.391592	-4.84781	1.24832e-06	0.000117675	Tlx2
ENSMUSG00000036403	463.073	-0.966832	0.199664	-4.8423	1.28347e-06	0.000120334	Cep135
ENSMUSG00000048138	75.4183	-1.95407	0.403998	-4.83682	1.3193e-06	0.00012237	Dmrt2
ENSMUSG00000028093	948.341	-1.01773	0.211105	-4.82094	1.42882e-06	0.00013173	Acp6
ENSMUSG00000045087	187.888	-1.25428	0.260222	-4.82003	1.4354e-06	0.00013173	S1pr5
ENSMUSG00000073775	1315.82	-1.1468	0.237994	-4.81862	1.44553e-06	0.000131962	Kti12
ENSMUSG00000060950	86.2752	-1.55241	0.322394	-4.81526	1.47007e-06	0.000132804	Trmt61a
ENSMUSG00000024642	1115.91	-0.954114	0.19813	-4.8156	1.4676e-06	0.000132804	Tle4
ENSMUSG00000035352	22.4714	-3.39524	0.707956	-4.79583	1.62006e-06	0.000144102	Ccl12
ENSMUSG00000038550	924.834	-1.37169	0.28659	-4.78625	1.6993e-06	0.000149616	Ciart
ENSMUSG00000101089	81.8305	-1.57738	0.330397	-4.7742	1.80419e-06	0.000158049	2610016A17Rik
ENSMUSG00000000142	198.066	-1.36012	0.28541	-4.7655	1.88387e-06	0.000163378	Axin2
ENSMUSG00000071847	232.974	-1.28694	0.270854	-4.75141	2.02007e-06	0.000174319	Apcdd1
ENSMUSG00000028318	1752.71	-1.04964	0.221701	-4.73446	2.19635e-06	0.000186743	Polr1e
ENSMUSG00000019301	149.088	-1.797	0.379441	-4.73592	2.18062e-06	0.000186743	Hsd17b1
ENSMUSG00000038023	268.297	-1.13784	0.240584	-4.7295	2.25069e-06	0.000189506	Atp6v0a2
ENSMUSG00000024232	2620.44	-0.780873	0.165082	-4.73021	2.24291e-06	0.000189506	Bambi
ENSMUSG00000052384	64.5923	-1.62354	0.343601	-4.72509	2.30011e-06	0.000192731	Nrros
ENSMUSG00000015396	859.753	-1.21264	0.25707	-4.71714	2.39178e-06	0.000198424	Cd83
ENSMUSG00000022895	4111.77	-0.824975	0.174922	-4.71625	2.40236e-06	0.000198424	Ets2
ENSMUSG00000008540	3670.32	-1.43854	0.307428	-4.67927	2.87896e-06	0.000234439	Mgst1
ENSMUSG00000026249	2525.36	-0.849631	0.182444	-4.65694	3.20952e-06	0.00025319	Serpine2
ENSMUSG00000040586	431.697	-1.09983	0.23617	-4.65694	3.20945e-06	0.00025319	Ofd1
ENSMUSG00000037759	83.8983	-1.51168	0.324681	-4.65588	3.226e-06	0.00025319	Ptger2
ENSMUSG00000040618	2579.69	-0.9097	0.195242	-4.65933	3.17233e-06	0.00025319	Pck2
ENSMUSG00000002325	272.531	-1.23177	0.264511	-4.65677	3.21215e-06	0.00025319	Irf9
ENSMUSG00000042379	48.3045	-2.06027	0.443321	-4.64736	3.36216e-06	0.000261582	Esm1
ENSMUSG00000101523	105.627	-2.10571	0.453208	-4.64624	3.38045e-06	0.000261759	Csnk2a3
ENSMUSG00000000823	143.787	-1.31375	0.283844	-4.62843	3.68445e-06	0.00028403	Zfp512b
ENSMUSG00000033355	44.1791	-2.26595	0.489922	-4.62513	3.7437e-06	0.000287321	Rtp4
ENSMUSG00000031461	82.2701	-1.64472	0.357182	-4.6047	4.13053e-06	0.000315613	Myom2
ENSMUSG00000028261	3451.95	-1.00656	0.218717	-4.6021	4.18253e-06	0.000318184	Ndufaf4
ENSMUSG00000022185	1819.23	-0.947041	0.20584	-4.60086	4.20758e-06	0.000318692	Acin1
ENSMUSG00000038679	1625.92	-0.832301	0.181467	-4.58652	4.50685e-06	0.000339875	Trps1
ENSMUSG00000022321	102.726	-1.49895	0.327605	-4.57548	4.75126e-06	0.000352182	Cdh10
ENSMUSG00000051379	732.085	-0.890295	0.194829	-4.56963	4.88584e-06	0.000360484	Flrt3
ENSMUSG00000038828	496.433	-0.901118	0.19741	-4.5647	5.00212e-06	0.000366084	Tmem214
ENSMUSG00000072501	931.037	-0.84207	0.184683	-4.55954	5.12664e-06	0.00037362	Phf20l1
ENSMUSG00000028820	4368.74	-0.823318	0.181016	-4.54832	5.40746e-06	0.000392437	Sfpq
ENSMUSG00000026527	62.272	-1.69669	0.37415	-4.53477	5.76661e-06	0.000411613	Rgs7
ENSMUSG00000036256	176.909	-1.41193	0.311247	-4.53635	5.72353e-06	0.000411613	Igfbp7
ENSMUSG00000038418	57.491	-1.70901	0.377409	-4.52827	5.9468e-06	0.000422735	Egr1
ENSMUSG00000032125	96.8537	-1.51692	0.335179	-4.5257	6.01954e-06	0.000424426	Robo4
ENSMUSG00000056492	103.996	-1.36357	0.301292	-4.52572	6.01891e-06	0.000424426	Adgrf5
ENSMUSG00000075302	426.866	-0.996166	0.220158	-4.52478	6.04577e-06	0.00042455	Erich2
ENSMUSG00000052906	381.203	-0.995971	0.220411	-4.5187	6.22193e-06	0.000431677	Ubxn8
ENSMUSG00000022788	342.274	-0.923479	0.204299	-4.52024	6.17701e-06	0.000431677	Fgd4
ENSMUSG00000106718	49.6226	-1.8659	0.413261	-4.51508	6.32936e-06	0.000437382	Gm20052
ENSMUSG00000031506	33.9305	-2.21638	0.491417	-4.51018	6.47736e-06	0.00044407	Ptpn7
ENSMUSG00000061762	68.1066	-1.88007	0.417658	-4.50147	6.74859e-06	0.000453391	Tac1
ENSMUSG00000046675	773.961	-1.02916	0.228606	-4.5019	6.73481e-06	0.000453391	Tmem251
ENSMUSG00000050796	267.148	-1.07199	0.238303	-4.49843	6.84565e-06	0.000456684	B3galt6
ENSMUSG00000059834	1108.2	-0.787842	0.175273	-4.49494	6.959e-06	0.000461219	Sclt1
ENSMUSG00000025485	1164.64	-1.09506	0.243676	-4.49389	6.99341e-06	0.000461219	Ric8a
ENSMUSG00000071256	139.983	-1.22767	0.273152	-4.49447	6.97428e-06	0.000461219	Zfp213
ENSMUSG00000017677	1305.23	-0.907462	0.202175	-4.4885	7.17253e-06	0.000469462	Wsb1
ENSMUSG00000042599	895.953	-0.917432	0.204601	-4.484	7.32565e-06	0.000477651	Kdm7a
ENSMUSG00000045591	50.9735	-2.08383	0.465158	-4.47984	7.4698e-06	0.000483446	Olig3
ENSMUSG00000048562	1262.06	-1.20039	0.268357	-4.47312	7.7088e-06	0.000495219	Sp8
ENSMUSG00000028780	103.699	-1.66524	0.373046	-4.46388	8.04871e-06	0.000515147	Sema3c
ENSMUSG00000059142	308.462	-1.07611	0.241334	-4.459	8.23444e-06	0.000525097	Zfp945
ENSMUSG00000034075	293.882	-1.06016	0.237839	-4.45745	8.29387e-06	0.000526949	Zdhhc5
ENSMUSG00000037010	80.5633	-1.57406	0.35334	-4.45481	8.39675e-06	0.000531539	Apln
ENSMUSG00000022367	543.613	-1.07235	0.240961	-4.45031	8.57474e-06	0.000538873	Has2
ENSMUSG00000067613	50.4882	-1.85567	0.417621	-4.44343	8.8537e-06	0.000554395	Krt83
ENSMUSG00000098923	244.67	-1.1215	0.252582	-4.44014	8.99015e-06	0.000558904	Tmem185b
ENSMUSG00000052137	141.599	-1.17485	0.264562	-4.44075	8.96464e-06	0.000558904	Rbm12b2
ENSMUSG00000020876	401.742	-1.27918	0.289304	-4.42157	9.7985e-06	0.000602677	Snx11
ENSMUSG00000062327	7298.64	-0.810096	0.183342	-4.4185	9.93883e-06	0.000607003	T
ENSMUSG00000037172	883.321	-0.928365	0.210246	-4.41562	1.00722e-05	0.000611566	Dennd11
ENSMUSG00000040675	1012.53	-0.907141	0.205761	-4.4087	1.03991e-05	0.000626292	Mthfd1l
ENSMUSG00000029757	597.817	-0.826023	0.187561	-4.40403	1.06259e-05	0.000637737	Dync1i1
ENSMUSG00000022122	91.9498	-1.44587	0.32844	-4.40223	1.07146e-05	0.000640842	Ednrb
ENSMUSG00000020875	987.462	-0.948513	0.21586	-4.39411	1.11227e-05	0.000660694	Hoxb9
ENSMUSG00000051413	1488.46	-0.81599	0.185936	-4.38856	1.14105e-05	0.00066869	Plagl2
ENSMUSG00000021994	3579.76	-0.959745	0.218693	-4.38854	1.14115e-05	0.00066869	Wnt5a
ENSMUSG00000068205	236.415	-1.04614	0.23849	-4.3865	1.15191e-05	0.000670464	Macrod2
ENSMUSG00000044548	226.812	-1.22109	0.278828	-4.37938	1.19015e-05	0.000690409	Dact1
ENSMUSG00000022099	380.555	-0.965378	0.221181	-4.36464	1.27329e-05	0.000730549	Dmtn
ENSMUSG00000005360	456.788	-0.941103	0.215644	-4.36415	1.2762e-05	0.000730549	Slc1a3
ENSMUSG00000040713	2627.92	-1.00078	0.229395	-4.36269	1.28476e-05	0.00073303	Creg1
ENSMUSG00000041445	162.904	-1.11293	0.255145	-4.36194	1.28915e-05	0.000733124	Mmrn2
ENSMUSG00000040717	1135.28	-1.09059	0.250399	-4.35539	1.3283e-05	0.000748032	Il17rd
ENSMUSG00000053477	3049.36	-0.762702	0.17524	-4.35233	1.34701e-05	0.000753671	Tcf4
ENSMUSG00000024565	1102.24	-0.801339	0.184093	-4.3529	1.3435e-05	0.000753671	Sall3
ENSMUSG00000060548	1551.68	-0.888711	0.205264	-4.32959	1.49386e-05	0.000817382	Tnfrsf19
ENSMUSG00000021701	868.363	-1.02655	0.237352	-4.325	1.52534e-05	0.000829375	Plk2
ENSMUSG00000058704	2152.66	-0.828418	0.191658	-4.32237	1.54363e-05	0.000834088	Memo1
ENSMUSG00000020198	901.15	-0.901085	0.20855	-4.32073	1.55517e-05	0.000837717	Ap3d1
ENSMUSG00000031480	82.7859	-1.38893	0.324114	-4.2853	1.82492e-05	0.000967987	Thsd1
ENSMUSG00000028293	3329.28	-0.931073	0.217349	-4.28377	1.8375e-05	0.000971689	Slc35a1
ENSMUSG00000045730	113.576	-1.39627	0.326181	-4.28067	1.86333e-05	0.000982355	Adrb2
ENSMUSG00000001029	63.3241	-1.73152	0.404744	-4.27807	1.88521e-05	0.00099088	Icam2
ENSMUSG00000041633	111.324	-1.58791	0.3721	-4.26744	1.97733e-05	0.00102993	Kctd12b
ENSMUSG00000053907	1158.04	-1.15316	0.271117	-4.25336	2.10583e-05	0.00109032	Mat2a
ENSMUSG00000031657	981.951	-0.966949	0.227426	-4.2517	2.12149e-05	0.00109516	Heatr3
ENSMUSG00000021468	824.648	-0.768136	0.181461	-4.23305	2.3054e-05	0.00118305	Sptlc1
ENSMUSG00000055531	2073.25	-0.798669	0.188737	-4.23165	2.31978e-05	0.00118692	Cpsf6
ENSMUSG00000036985	141.366	-1.09996	0.260095	-4.22908	2.34647e-05	0.00119449	Zdhhc9
ENSMUSG00000008730	1186.99	-0.806608	0.191011	-4.22283	2.4125e-05	0.00121996	Hipk1
ENSMUSG00000029446	7277.44	-0.889758	0.211513	-4.20664	2.59195e-05	0.0012845	Psph
ENSMUSG00000038766	863.003	-0.842007	0.200402	-4.20159	2.65042e-05	0.00130973	Gabpb2
ENSMUSG00000038615	648.475	-0.821398	0.19553	-4.20087	2.65893e-05	0.0013102	Nfe2l1
ENSMUSG00000001656	200.54	-1.06449	0.253652	-4.19667	2.70871e-05	0.00132719	Hoxc11
ENSMUSG00000041313	1016.97	-1.12455	0.269175	-4.17776	2.94393e-05	0.00143434	Slc7a1
ENSMUSG00000022711	669.072	-0.920871	0.221002	-4.16681	3.08892e-05	0.00148718	Pmm2
ENSMUSG00000040274	4406.93	-0.903947	0.217181	-4.16219	3.15211e-05	0.00150615	Cdk6
ENSMUSG00000020475	126.827	-1.39735	0.336391	-4.15393	3.26809e-05	0.00154877	Pgam2
ENSMUSG00000038279	794.083	-0.913389	0.220022	-4.15136	3.30511e-05	0.00156205	Nop2
ENSMUSG00000072704	934.144	-0.975948	0.235127	-4.15073	3.31411e-05	0.00156205	Smim10l1
ENSMUSG00000001655	2286.12	-0.841883	0.202989	-4.14743	3.36235e-05	0.00158049	Hoxc13
ENSMUSG00000035274	364.039	-1.09255	0.264082	-4.13718	3.51602e-05	0.00163939	Tpbg
ENSMUSG00000001566	53.796	-1.63223	0.395006	-4.13216	3.59365e-05	0.00166663	Mnx1
ENSMUSG00000090958	21.6986	-2.41913	0.586575	-4.12416	3.72091e-05	0.00170738	Lrrc32
ENSMUSG00000030347	886.134	-0.865581	0.21034	-4.11516	3.86918e-05	0.00176532	D6Wsu163e
ENSMUSG00000031661	660.887	-0.762618	0.185796	-4.10461	4.04998e-05	0.00183412	Nkd1
ENSMUSG00000024987	1893.12	-0.857332	0.20939	-4.09443	4.23208e-05	0.00190663	Cyp26a1
ENSMUSG00000032238	502.949	-0.889211	0.217487	-4.08858	4.34029e-05	0.00195032	Rora
ENSMUSG00000061950	1120.1	-0.801604	0.196132	-4.08707	4.36861e-05	0.00195797	Ppp4r1
ENSMUSG00000034486	215.543	-1.16701	0.285589	-4.08631	4.38297e-05	0.00195935	Gbx2
ENSMUSG00000052821	43.6888	-1.93834	0.474835	-4.08213	4.46256e-05	0.0019847	Cysltr1
ENSMUSG00000028327	565.153	-0.826249	0.203072	-4.06875	4.72659e-05	0.00209139	Stra6l
ENSMUSG00000051323	316.73	-1.13178	0.278616	-4.06216	4.86214e-05	0.00214045	Pcdh19
ENSMUSG00000029173	411.439	-0.829559	0.20427	-4.06108	4.88452e-05	0.00214486	Sepsecs
ENSMUSG00000051235	848.316	-1.05224	0.260642	-4.03713	5.41095e-05	0.00231736	Gen1
ENSMUSG00000049957	448.217	-0.866133	0.21476	-4.03303	5.5063e-05	0.00235238	Ccdc137
ENSMUSG00000061244	1003.64	-0.872345	0.216373	-4.03167	5.53826e-05	0.00236022	Exoc5
ENSMUSG00000022369	1227.12	-0.811438	0.201391	-4.02916	5.59762e-05	0.00237386	Mtbp
ENSMUSG00000028889	515.577	-0.776538	0.193124	-4.02092	5.79708e-05	0.00244648	Yrdc
ENSMUSG00000037085	513.509	-1.03398	0.257252	-4.01935	5.83597e-05	0.00245692	Trmt12
ENSMUSG00000020916	65.5967	-1.55368	0.386616	-4.01866	5.85302e-05	0.00245813	Krt36
ENSMUSG00000113186	46.6679	-2.06692	0.51449	-4.01741	5.88418e-05	0.0024593	A330076C08Rik
ENSMUSG00000020719	16531.6	-0.691021	0.172089	-4.01549	5.93228e-05	0.00247345	Ddx5
ENSMUSG00000039068	1146.91	-0.778693	0.194006	-4.01376	5.97584e-05	0.00248563	Zzz3
ENSMUSG00000015533	33.7618	-2.09968	0.524083	-4.00639	6.16528e-05	0.00254611	Itga2
ENSMUSG00000032667	661.952	-0.727761	0.181908	-4.00071	6.3154e-05	0.00259575	Pon2
ENSMUSG00000022887	66.3862	-1.42242	0.355625	-3.99979	6.33992e-05	0.00259967	Masp1
ENSMUSG00000033063	12.6864	-3.56158	0.892237	-3.99174	6.55908e-05	0.00268042	Cntnap3
ENSMUSG00000038305	553.781	-0.989883	0.248523	-3.98307	6.8031e-05	0.002757	Spats2l
ENSMUSG00000028751	15.4606	-2.93032	0.736217	-3.98024	6.88445e-05	0.00278347	Pla2g2e
ENSMUSG00000029338	392.217	-0.982291	0.247515	-3.96862	7.229e-05	0.00290248	Antxr2
ENSMUSG00000052305	870.611	-2.16037	0.544666	-3.96641	7.29618e-05	0.00291364	Hbb-b1
ENSMUSG00000037851	3981.01	-0.700032	0.176743	-3.96072	7.47231e-05	0.00295233	Iars
ENSMUSG00000063952	111.869	-1.3115	0.331096	-3.96109	7.46069e-05	0.00295233	Brpf3
ENSMUSG00000029830	126.363	-1.0975	0.27783	-3.95024	7.80727e-05	0.00307766	Svopl
ENSMUSG00000029752	13153.6	-0.895599	0.22744	-3.93774	8.22529e-05	0.00322171	Asns
ENSMUSG00000024006	1403.76	-0.699307	0.177595	-3.93765	8.2284e-05	0.00322171	Stk38
ENSMUSG00000038188	46.8232	-1.823	0.463867	-3.93	8.49449e-05	0.0033184	Scarf1
ENSMUSG00000034765	95.1016	-1.26804	0.323632	-3.91816	8.92262e-05	0.00345453	Dusp5
ENSMUSG00000074221	1230.8	-0.741762	0.189548	-3.91332	9.10359e-05	0.00350893	Zfp568
ENSMUSG00000057715	103.002	-1.41333	0.361576	-3.90881	9.27512e-05	0.00356711	A830018L16Rik
ENSMUSG00000024168	164.424	-1.18829	0.304471	-3.90282	9.508e-05	0.00363252	Tmem204
ENSMUSG00000053617	325.321	-0.915606	0.234898	-3.89789	9.70329e-05	0.00369087	Sh3pxd2a
ENSMUSG00000022197	298.746	-1.06866	0.274367	-3.89498	9.82059e-05	0.00372731	Pdzd2
ENSMUSG00000022772	756.626	-0.785447	0.201734	-3.89348	9.88144e-05	0.00374222	Senp5
ENSMUSG00000033964	277.082	-0.943947	0.242583	-3.89123	9.97392e-05	0.00376901	Zbtb41
ENSMUSG00000026843	1232.06	-0.660888	0.169962	-3.88845	0.000100888	0.00380414	Fubp3
ENSMUSG00000015653	342.269	-0.801122	0.206057	-3.88787	0.000101129	0.00380494	Steap2
ENSMUSG00000043259	1388.53	-0.966143	0.248703	-3.88473	0.000102445	0.00384611	Fam13c
ENSMUSG00000028970	178.411	-2.66279	0.687257	-3.87452	0.000106833	0.00397644	Abcb1b
ENSMUSG00000037475	2445.59	-0.667027	0.172216	-3.8732	0.000107415	0.00398955	Thoc2
ENSMUSG00000020923	966.095	-0.73178	0.189307	-3.86556	0.000110832	0.00409011	Ubtf
ENSMUSG00000027547	3554.53	-0.664263	0.172468	-3.85151	0.000117394	0.00429576	Sall4
ENSMUSG00000048814	58.2334	-1.74616	0.453874	-3.84725	0.000119453	0.00436192	Lonrf2
ENSMUSG00000030077	54.6063	-1.6616	0.432122	-3.8452	0.000120453	0.00437999	Chl1
ENSMUSG00000017679	589.41	-0.837866	0.218189	-3.84009	0.000122991	0.0044536	Ttpal
ENSMUSG00000028057	1159.36	-0.82574	0.215186	-3.83733	0.000124378	0.00449444	Rit1
ENSMUSG00000008398	465.677	-0.853287	0.222794	-3.82993	0.000128178	0.00458403	Elk3
ENSMUSG00000035504	45.6112	-1.74828	0.456714	-3.82795	0.000129213	0.00459261	Reep6
ENSMUSG00000037940	364.499	-0.78046	0.203884	-3.82796	0.000129208	0.00459261	Inpp4b
ENSMUSG00000066026	482.414	-0.800658	0.209315	-3.82513	0.000130704	0.00462664	Dhrs3
ENSMUSG00000042385	667.709	-1.01809	0.266519	-3.81995	0.000133477	0.0047056	Gzmk
ENSMUSG00000110126	422.456	-0.989544	0.259685	-3.81056	0.000138653	0.00485846	Gm9347
ENSMUSG00000029275	14.7541	-2.91575	0.765696	-3.80798	0.000140107	0.00488964	Gfi1
ENSMUSG00000036009	263.084	-1.0236	0.268886	-3.8068	0.000140778	0.00490319	Mettl25
ENSMUSG00000026784	805.598	-0.686975	0.180556	-3.80477	0.000141936	0.00492376	Pdss1
ENSMUSG00000025403	5221.01	-0.93374	0.245387	-3.80517	0.000141708	0.00492376	Shmt2
ENSMUSG00000024999	542.946	-0.822144	0.216326	-3.80049	0.000144408	0.0049995	Noc3l
ENSMUSG00000002103	503.935	-0.83482	0.220072	-3.79339	0.000148605	0.00511419	Acp2
ENSMUSG00000060579	355.21	-0.964391	0.254434	-3.79034	0.000150443	0.00515699	Fhit
ENSMUSG00000114828	13.7908	-3.28568	0.866853	-3.79036	0.000150431	0.00515699	AI463229
ENSMUSG00000032715	1985.5	-1.09981	0.290431	-3.78682	0.00015259	0.00519871	Trib3
ENSMUSG00000038612	788.073	-0.827616	0.218577	-3.78638	0.000152859	0.00519871	Mcl1
ENSMUSG00000031932	80.1097	-1.51985	0.401375	-3.78662	0.000152712	0.00519871	Gpr83
ENSMUSG00000037376	1528.57	-0.659018	0.17469	-3.77251	0.000161615	0.00543404	Trmt6
ENSMUSG00000038236	596.785	-0.755907	0.200993	-3.76085	0.000169335	0.00568107	Hoxa7
ENSMUSG00000008575	323.125	-0.817939	0.217712	-3.75699	0.000171972	0.00574732	Nfib
ENSMUSG00000028709	129.126	-1.32688	0.35335	-3.75515	0.000173238	0.00576093	Mob3c
ENSMUSG00000073599	531.333	-0.826287	0.220119	-3.75382	0.00017416	0.00577592	Ecscr
ENSMUSG00000000861	293.1	-0.986698	0.263101	-3.75027	0.000176647	0.00584721	Bcl11a
ENSMUSG00000033323	292.783	-0.86329	0.230396	-3.74699	0.000178968	0.00589033	Ctdp1
ENSMUSG00000041415	2415.88	-0.72417	0.193351	-3.74536	0.000180135	0.00591749	Dicer1
ENSMUSG00000024493	9130.24	-0.696408	0.186129	-3.74154	0.000182898	0.00598559	Lars
ENSMUSG00000046572	383.076	-0.786209	0.210437	-3.73609	0.000186906	0.00610526	Zfp518b
ENSMUSG00000024287	2992.23	-0.769836	0.206166	-3.73405	0.000188424	0.00613175	Thoc1
ENSMUSG00000002345	1978.76	-0.669155	0.179822	-3.72121	0.000198272	0.00642809	Borcs8
ENSMUSG00000055866	54.0391	-1.57117	0.422822	-3.71591	0.000202475	0.00655209	Per2
ENSMUSG00000034586	46.9554	-1.53398	0.413188	-3.71255	0.000205181	0.00661498	Hid1
ENSMUSG00000031665	2107.03	-0.744054	0.200547	-3.71012	0.000207157	0.00664167	Sall1
ENSMUSG00000014195	5173.69	-0.922996	0.248906	-3.70821	0.000208732	0.0066798	Dnajc7
ENSMUSG00000020137	478.548	-0.867741	0.234114	-3.7065	0.000210145	0.00671102	Thap2
ENSMUSG00000050830	14.8519	-2.67862	0.722761	-3.70609	0.000210481	0.00671102	Vwc2
ENSMUSG00000023886	489.79	-0.827799	0.223492	-3.70393	0.000212284	0.00675608	Smoc2
ENSMUSG00000037656	481.999	-0.859149	0.232409	-3.6967	0.000218417	0.00691323	Slc20a2
ENSMUSG00000036819	475.997	-0.95666	0.258956	-3.69429	0.000220502	0.00694122	Jmjd4
ENSMUSG00000069769	912.503	-0.721371	0.195336	-3.69297	0.000221648	0.00696465	Msi2
ENSMUSG00000039717	26.1946	-2.23802	0.606835	-3.68802	0.000226002	0.00708862	Ralyl
ENSMUSG00000028414	690.923	-0.721244	0.195644	-3.68651	0.000227353	0.00710528	Fktn
ENSMUSG00000045092	70.2983	-1.38696	0.376334	-3.68543	0.000228314	0.0071225	S1pr1
ENSMUSG00000017724	664.431	-0.740573	0.201071	-3.68315	0.000230373	0.00716716	Etv4
ENSMUSG00000048109	555.908	-0.852877	0.231978	-3.67654	0.000236418	0.00732264	Rbm15
ENSMUSG00000043157	18.878	-2.51835	0.685937	-3.67139	0.000241231	0.00740177	Arl11
ENSMUSG00000030725	1236.84	-0.63669	0.173503	-3.66961	0.00024292	0.00741804	Lipt2
ENSMUSG00000036368	180.715	-0.897051	0.24483	-3.66397	0.000248332	0.00756998	Rmdn2
ENSMUSG00000010097	3150.28	-0.76521	0.208895	-3.66314	0.000249144	0.00758141	Nxf1
ENSMUSG00000039178	905.831	-0.765374	0.209051	-3.66119	0.000251043	0.00761031	Tbc1d19
ENSMUSG00000022536	1473.36	-0.663007	0.181085	-3.66131	0.000250931	0.00761031	Glyr1
ENSMUSG00000027829	1794.34	-0.626196	0.17114	-3.65898	0.00025322	0.00763844	Ccnl1
ENSMUSG00000040584	18.3567	-2.5035	0.68466	-3.65656	0.000255626	0.00769763	Abcb1a
ENSMUSG00000042608	289.899	-0.825514	0.226556	-3.64376	0.000268687	0.00806294	Stk40
ENSMUSG00000070047	1393.88	-0.934228	0.257031	-3.63469	0.000278312	0.00830863	Fat1
ENSMUSG00000090098	10.4317	-3.53368	0.974694	-3.62542	0.000288491	0.00856828	Alms1-ps2
ENSMUSG00000034154	484.336	-0.720038	0.198785	-3.6222	0.000292111	0.00864517	Ino80
ENSMUSG00000078779	183.106	-0.905081	0.249899	-3.62179	0.000292575	0.00864517	Zfp59
ENSMUSG00000037419	330.258	-1.01533	0.280588	-3.61856	0.000296247	0.00870917	Endod1
ENSMUSG00000048013	21.3861	-2.46198	0.681355	-3.61336	0.000302254	0.00884081	Krt35
ENSMUSG00000050103	23.4644	-2.04528	0.567507	-3.60397	0.000313394	0.00912049	Agmo
ENSMUSG00000040687	188.146	-0.929173	0.258695	-3.59177	0.000328439	0.00951048	Madd
ENSMUSG00000085282	39.1256	-1.74284	0.485997	-3.58611	0.000335645	0.00968678	Gm15663
ENSMUSG00000028332	177.874	-1.12663	0.314462	-3.58272	0.000340041	0.00978111	Hemgn
ENSMUSG00000035666	1023.96	-0.627555	0.17523	-3.58133	0.000341848	0.00980059	Gtf3c4
ENSMUSG00000022241	8531.93	-0.740767	0.206819	-3.58173	0.000341331	0.00980059	Tars
ENSMUSG00000062713	13.7193	-2.68232	0.750453	-3.57427	0.000351209	0.00998644	Sim2

## Sheet: DEG_Tg_UP _p0.01
row	baseMean	log2FoldChange	lfcSE	stat	pvalue	padj	symbol
ENSMUSG00000082809	265.633	2.93486	0.308506	9.51314	1.84986e-21	2.91689e-18	Gm14150
ENSMUSG00000001663	273.82	1.92698	0.245344	7.8542	4.02343e-15	2.49237e-12	Gstt1
ENSMUSG00000074794	369.456	2.29162	0.295002	7.76814	7.96444e-15	4.76356e-12	Arrdc3
ENSMUSG00000073421	144.562	2.34264	0.306722	7.63767	2.21188e-14	1.27883e-11	H2-Ab1
ENSMUSG00000022884	13022.3	1.30441	0.184594	7.06636	1.59051e-12	7.68243e-10	Eif4a2
ENSMUSG00000070737	208.457	2.05364	0.303069	6.77613	1.23436e-11	4.46041e-09	Tmem35b
ENSMUSG00000109284	56.1912	3.06931	0.462504	6.63629	3.2168e-11	1.11591e-08	B230311B06Rik
ENSMUSG00000070576	327.112	1.47	0.232482	6.32304	2.56461e-10	7.94342e-08	Mn1
ENSMUSG00000078773	420.363	1.46248	0.231847	6.30793	2.82784e-10	8.4567e-08	Rad54b
ENSMUSG00000061654	71.8114	2.11983	0.355201	5.96796	2.40241e-09	5.63106e-07	Spry3
ENSMUSG00000055200	1279.68	1.15915	0.196262	5.90613	3.50232e-09	8.09898e-07	Sertad3
ENSMUSG00000052658	97.1434	2.06618	0.352332	5.8643	4.51024e-09	9.90255e-07	5830454E08Rik
ENSMUSG00000015312	145.387	1.54635	0.264886	5.83781	5.28919e-09	1.1338e-06	Gadd45b
ENSMUSG00000010830	371.102	1.26477	0.216659	5.83763	5.29478e-09	1.1338e-06	Kdelr3
ENSMUSG00000014361	79.8454	2.04886	0.356719	5.74363	9.26668e-09	1.89095e-06	Mertk
ENSMUSG00000073409	65.2844	2.73876	0.479627	5.71018	1.12855e-08	2.27062e-06	H2-Q6
ENSMUSG00000022132	177.467	1.7181	0.306704	5.60182	2.12119e-08	3.8325e-06	Cldn10
ENSMUSG00000091269	62.6756	2.47545	0.4418	5.60311	2.10542e-08	3.8325e-06	Gm6682
ENSMUSG00000049107	306.688	1.40962	0.253732	5.55553	2.76766e-08	4.75297e-06	Ntf3
ENSMUSG00000044349	226.39	1.42843	0.259713	5.50004	3.79705e-08	6.21319e-06	Snhg11
ENSMUSG00000031548	288.958	1.41223	0.258425	5.46478	4.63482e-08	7.37531e-06	Sfrp1
ENSMUSG00000090952	157.238	1.5558	0.286087	5.4382	5.38205e-08	8.41007e-06	Gm17251
ENSMUSG00000026773	223.141	1.32418	0.243585	5.43621	5.44273e-08	8.42894e-06	Pfkfb3
ENSMUSG00000053475	75.0852	1.98811	0.366254	5.42824	5.69136e-08	8.65935e-06	Tnfaip6
ENSMUSG00000074170	316.201	1.20699	0.222975	5.4131	6.19414e-08	9.34237e-06	Plekhf1
ENSMUSG00000047115	301.765	1.29161	0.23944	5.39429	6.8796e-08	1.01989e-05	Fam221a
ENSMUSG00000028247	732.962	1.06952	0.199324	5.36571	8.06321e-08	1.14856e-05	Coq3
ENSMUSG00000024268	268.843	1.22142	0.227692	5.36433	8.12481e-08	1.14856e-05	Celf4
ENSMUSG00000045294	192.35	1.74611	0.334456	5.22074	1.7821e-07	2.29937e-05	Insig1
ENSMUSG00000064254	842.275	1.09517	0.209804	5.21996	1.78965e-07	2.29937e-05	Ethe1
ENSMUSG00000055202	327.781	1.37979	0.265373	5.19943	1.99896e-07	2.54941e-05	Zfp811
ENSMUSG00000067219	82.6358	1.73605	0.337219	5.14814	2.63079e-07	3.18686e-05	Nipal1
ENSMUSG00000029864	1152.03	1.0893	0.211743	5.14443	2.68329e-07	3.20977e-05	Gstk1
ENSMUSG00000025420	471.591	1.08574	0.212408	5.1116	3.19443e-07	3.76921e-05	Katnal2
ENSMUSG00000011148	40.7564	2.21097	0.434271	5.09124	3.55733e-07	4.14106e-05	Adssl1
ENSMUSG00000037071	690.595	0.951671	0.188571	5.04675	4.494e-07	5.03334e-05	Scd1
ENSMUSG00000036111	372.557	1.09151	0.219081	4.98222	6.28586e-07	6.64807e-05	Lmo1
ENSMUSG00000038332	704.133	1.34333	0.270299	4.96978	6.703e-07	7.04628e-05	Sesn1
ENSMUSG00000018427	102.796	1.78293	0.359146	4.96437	6.89237e-07	7.15858e-05	Ypel2
ENSMUSG00000032641	417.586	1.13745	0.230603	4.93248	8.11918e-07	8.38257e-05	Gpr19
ENSMUSG00000056043	57.7917	1.92178	0.390663	4.91928	8.68643e-07	8.86271e-05	Rgs9bp
ENSMUSG00000079056	274.51	1.36852	0.279536	4.89568	9.79671e-07	9.76574e-05	Kcnip3
ENSMUSG00000052316	26.637	2.72319	0.557652	4.88332	1.04315e-06	0.000103391	Lrrc15
ENSMUSG00000017723	436.444	1.16414	0.238819	4.87457	1.09048e-06	0.000107468	Wfdc2
ENSMUSG00000042797	77.5724	1.77665	0.364564	4.87335	1.09721e-06	0.000107521	Aqp11
ENSMUSG00000085042	42.1982	2.18585	0.450297	4.85423	1.20858e-06	0.000115609	Abhd11os
ENSMUSG00000091697	533.019	1.62817	0.336436	4.83946	1.30195e-06	0.000121411	Eif3s6-ps2
ENSMUSG00000023953	143.176	1.24287	0.258506	4.80791	1.5252e-06	0.00013707	Polh
ENSMUSG00000002732	470.668	1.34587	0.280976	4.78999	1.66793e-06	0.000147603	Fkbp7
ENSMUSG00000032118	261.031	3.25105	0.682062	4.76651	1.87446e-06	0.000163378	Fez1
ENSMUSG00000021835	311.71	1.09112	0.230428	4.73519	2.18846e-06	0.000186743	Bmp4
ENSMUSG00000066441	826.946	1.0128	0.214512	4.7214	2.34229e-06	0.000195322	Rdh11
ENSMUSG00000020216	56.5926	1.74492	0.372599	4.6831	2.82564e-06	0.000232278	Jsrp1
ENSMUSG00000074412	435.14	1.06466	0.227445	4.68093	2.8557e-06	0.000233642	Gm10689
ENSMUSG00000062210	1212.07	0.866044	0.185713	4.66334	3.1112e-06	0.000252167	Tnfaip8
ENSMUSG00000038496	84.0978	1.53473	0.329591	4.65645	3.21701e-06	0.00025319	Slc19a3
ENSMUSG00000042293	1198.73	0.942832	0.202354	4.65933	3.1724e-06	0.00025319	Gm5617
ENSMUSG00000020892	73.6242	1.5253	0.328211	4.6473	3.36309e-06	0.000261582	Aloxe3
ENSMUSG00000047963	284.924	1.10724	0.241593	4.58307	4.58196e-06	0.000344043	Stbd1
ENSMUSG00000019894	106.744	1.31858	0.287817	4.5813	4.621e-06	0.000345479	Slc6a15
ENSMUSG00000028972	26.2366	2.50432	0.546949	4.57871	4.67859e-06	0.000348284	Car6
ENSMUSG00000068617	148.597	1.33229	0.291606	4.56882	4.90483e-06	0.000360484	Efcab1
ENSMUSG00000028445	178.148	1.13709	0.250734	4.53506	5.75878e-06	0.000411613	Enho
ENSMUSG00000061740	104.389	1.55879	0.34365	4.53598	5.73363e-06	0.000411613	Cyp2d22
ENSMUSG00000025092	166.553	1.15995	0.257122	4.51127	6.44396e-06	0.000443533	Hspa12a
ENSMUSG00000027938	186.906	1.08043	0.239722	4.50701	6.57471e-06	0.000447209	Creb3l4
ENSMUSG00000033318	301.308	1.07095	0.237593	4.50749	6.55999e-06	0.000447209	Gstt2
ENSMUSG00000063972	78.9403	1.44171	0.320263	4.50165	6.74294e-06	0.000453391	Nr6a1
ENSMUSG00000060550	158.317	1.62631	0.361339	4.50079	6.77015e-06	0.000453391	H2-Q7
ENSMUSG00000042808	757.844	1.11813	0.248883	4.49262	7.03534e-06	0.000462227	Gpx2
ENSMUSG00000001665	80.2761	1.57126	0.350476	4.48321	7.35272e-06	0.000477651	Gstt3
ENSMUSG00000004473	136.254	1.28367	0.286737	4.47682	7.57631e-06	0.000488517	Clec11a
ENSMUSG00000050957	181.587	1.34433	0.301959	4.45201	8.50685e-06	0.00053655	Insl6
ENSMUSG00000024654	1296.88	0.963274	0.217138	4.43624	9.15441e-06	0.000567083	Asrgl1
ENSMUSG00000028773	105.712	1.34068	0.30295	4.42541	9.62612e-06	0.000594182	Fabp3
ENSMUSG00000019775	216.508	1.06164	0.240184	4.42012	9.86474e-06	0.000604608	Rgs17
ENSMUSG00000026429	3238.33	0.860372	0.194859	4.41536	1.00841e-05	0.000611566	Ube2t
ENSMUSG00000019906	58.8558	1.67122	0.379894	4.39917	1.08668e-05	0.000647714	Lin7a
ENSMUSG00000020363	305.212	1.21857	0.277366	4.39336	1.11611e-05	0.000660713	Gfpt2
ENSMUSG00000031712	67.0078	1.59337	0.362823	4.3916	1.1252e-05	0.000663832	Il15
ENSMUSG00000024990	691.112	0.846592	0.192962	4.38735	1.14742e-05	0.0006701	Rbp4
ENSMUSG00000042851	102.191	1.41088	0.323051	4.36736	1.25757e-05	0.000724672	Zc3h6
ENSMUSG00000020589	847.197	0.974339	0.223497	4.35953	1.30344e-05	0.000738828	Cyria
ENSMUSG00000061232	567.681	0.954838	0.219182	4.35637	1.32235e-05	0.000747105	H2-K1
ENSMUSG00000027560	58.8953	1.52728	0.351799	4.34133	1.41622e-05	0.000784804	Dok5
ENSMUSG00000038403	93.7261	1.53783	0.354181	4.34192	1.41246e-05	0.000784804	Hjv
ENSMUSG00000032193	67.8449	1.50311	0.346333	4.34008	1.42431e-05	0.000785884	Ldlr
ENSMUSG00000089804	179.053	1.13533	0.26162	4.33963	1.42723e-05	0.000785884	Gm16136
ENSMUSG00000057054	78.4015	1.41265	0.325996	4.33333	1.4687e-05	0.000806158	Inca1
ENSMUSG00000023330	1635.86	0.727233	0.168014	4.3284	1.502e-05	0.000819249	Dtwd1
ENSMUSG00000060063	50.5928	1.77492	0.412456	4.30329	1.68281e-05	0.000903661	Alox5ap
ENSMUSG00000029185	196.432	1.124	0.261249	4.30241	1.6895e-05	0.000904455	Fam114a1
ENSMUSG00000026255	65.8043	1.54092	0.358248	4.30126	1.69833e-05	0.000906388	Efhd1
ENSMUSG00000030255	56.1165	1.76894	0.412744	4.28582	1.82067e-05	0.000967987	Sspn
ENSMUSG00000001506	106.265	1.22809	0.28746	4.2722	1.93552e-05	0.00101425	Col1a1
ENSMUSG00000019539	615.355	1.06311	0.248897	4.27129	1.94348e-05	0.00101535	Rcn3
ENSMUSG00000030772	91.5343	1.29199	0.304921	4.23713	2.26395e-05	0.00116523	Dkk3
ENSMUSG00000051319	1730.97	0.929678	0.219871	4.22829	2.3547e-05	0.00119449	Mtln
ENSMUSG00000085407	32.6192	2.22674	0.526636	4.22824	2.35524e-05	0.00119449	1700095J03Rik
ENSMUSG00000015568	434.755	0.954689	0.226187	4.2208	2.43433e-05	0.00122743	Lpl
ENSMUSG00000051098	105.17	1.2515	0.296789	4.21681	2.47782e-05	0.00124472	Mblac2
ENSMUSG00000043091	1644.5	0.989657	0.234719	4.21634	2.48299e-05	0.00124472	Tuba1c
ENSMUSG00000022483	248.304	1.11394	0.264256	4.21538	2.49363e-05	0.00124646	Col2a1
ENSMUSG00000114241	37.0216	1.90048	0.451191	4.21215	2.52949e-05	0.00126075	Gm30108
ENSMUSG00000031604	1635.77	0.908247	0.215669	4.21131	2.53892e-05	0.00126182	Msmo1
ENSMUSG00000043644	127.599	1.25952	0.300025	4.19806	2.6921e-05	0.00132279	0610009L18Rik
ENSMUSG00000046402	5758.77	0.693814	0.166374	4.1702	3.04335e-05	0.00147369	Rbp1
ENSMUSG00000020593	157.999	1.09465	0.262769	4.16582	3.1023e-05	0.00148718	Lpin1
ENSMUSG00000004791	184.62	1.13822	0.273236	4.16571	3.10382e-05	0.00148718	Pgf
ENSMUSG00000074281	35.6108	1.88184	0.454185	4.14334	3.42278e-05	0.00160454	Gm12522
ENSMUSG00000037321	49.2832	1.67382	0.404495	4.13805	3.50271e-05	0.00163759	Tap1
ENSMUSG00000022237	61.8905	1.62273	0.39268	4.13244	3.58931e-05	0.00166663	Ankrd33b
ENSMUSG00000042246	88.9173	1.31237	0.317804	4.1295	3.63548e-05	0.00168153	Tmc7
ENSMUSG00000040213	351.693	0.970746	0.235125	4.12864	3.64923e-05	0.0016834	Kyat3
ENSMUSG00000027254	64.9977	1.45004	0.351579	4.12436	3.71766e-05	0.00170738	Map1a
ENSMUSG00000006311	211.447	1.10839	0.269267	4.11632	3.84962e-05	0.00176178	Etv2
ENSMUSG00000051721	803.157	0.836317	0.203254	4.11465	3.87771e-05	0.00176532	Wdcp
ENSMUSG00000030401	167.45	1.10538	0.26926	4.10526	4.03861e-05	0.00183376	Rtn2
ENSMUSG00000001642	3128.57	0.961	0.234375	4.10026	4.1268e-05	0.00186405	Akr1b3
ENSMUSG00000064351	34130.4	0.759171	0.185818	4.08556	4.39707e-05	0.0019606	COX1
ENSMUSG00000078490	100.896	1.24257	0.304483	4.08093	4.48553e-05	0.00198981	Cfap74
ENSMUSG00000026034	3448.35	0.783818	0.192718	4.06717	4.75871e-05	0.00210025	Clk1
ENSMUSG00000060594	100.967	1.25145	0.30898	4.05026	5.11616e-05	0.0022409	Layn
ENSMUSG00000032291	10760.2	0.74469	0.183942	4.04851	5.15439e-05	0.00225196	Crabp1
ENSMUSG00000021876	677.685	1.1026	0.272486	4.04645	5.20001e-05	0.00225485	Rnase4
ENSMUSG00000042213	246.532	1.09467	0.270684	4.04409	5.25277e-05	0.00227205	Zfand4
ENSMUSG00000023206	70.1579	1.38816	0.343324	4.04328	5.27088e-05	0.0022738	Il15ra
ENSMUSG00000006360	285.004	1.39987	0.346269	4.04274	5.28302e-05	0.0022738	Crip1
ENSMUSG00000036854	338.936	1.05954	0.26219	4.04111	5.31983e-05	0.00228397	Hspb6
ENSMUSG00000036570	46.9124	1.69785	0.421309	4.02992	5.57949e-05	0.00237197	Fxyd1
ENSMUSG00000046714	154.043	1.08058	0.268435	4.02547	5.68627e-05	0.00240557	Foxc2
ENSMUSG00000109118	189.1	1.32857	0.331488	4.00789	6.12629e-05	0.00253605	Gm32031
ENSMUSG00000022964	905.409	0.762047	0.190293	4.00459	6.21239e-05	0.00255947	Tmem50b
ENSMUSG00000003824	1655.69	0.780118	0.195476	3.99087	6.58321e-05	0.00268042	Syce2
ENSMUSG00000034614	320.616	0.861532	0.215853	3.99129	6.57153e-05	0.00268042	Pik3ip1
ENSMUSG00000020937	57.4845	1.44243	0.361711	3.98779	6.66923e-05	0.00270908	Plcd3
ENSMUSG00000034424	5141.28	0.645588	0.162452	3.97402	7.06697e-05	0.00285062	Gcsh
ENSMUSG00000020297	154.791	1.31554	0.331099	3.97325	7.08984e-05	0.00285321	Nsg2
ENSMUSG00000085175	276.713	1.05691	0.266362	3.96793	7.2501e-05	0.00290423	Gm11423
ENSMUSG00000117545	17.7533	2.71186	0.683768	3.96606	7.30719e-05	0.00291364	Gm30794
ENSMUSG00000087259	91.6286	1.44244	0.363853	3.96434	7.35978e-05	0.00292788	2610035D17Rik
ENSMUSG00000046242	15.1328	3.01579	0.760868	3.96362	7.38207e-05	0.00293002	1600029I14Rik
ENSMUSG00000034795	29.4971	2.00816	0.509986	3.93769	8.22713e-05	0.00322171	Ccdc122
ENSMUSG00000074398	218.71	1.02217	0.260514	3.92367	8.72095e-05	0.00339921	Gm15441
ENSMUSG00000059659	38.5644	1.73036	0.441204	3.92191	8.78503e-05	0.00341651	Gm10069
ENSMUSG00000015474	175.492	0.99385	0.253635	3.91842	8.91323e-05	0.00345453	Ppt2
ENSMUSG00000052981	16.8798	2.63364	0.672472	3.91635	8.98982e-05	0.00347279	Ube2ql1
ENSMUSG00000063172	2615.53	0.695125	0.177862	3.90823	9.29739e-05	0.00356777	Hspb11
ENSMUSG00000018217	676.02	0.894898	0.229034	3.90727	9.33464e-05	0.00357416	Pmp22
ENSMUSG00000026360	225.82	1.03249	0.264839	3.89854	9.67739e-05	0.00368911	Rgs2
ENSMUSG00000019774	630.025	0.710812	0.183032	3.88353	0.000102952	0.00385681	Mtrf1l
ENSMUSG00000056383	186.4	0.944511	0.243504	3.87883	0.00010496	0.00392354	AI987944
ENSMUSG00000039384	58.6744	1.54706	0.399507	3.87242	0.00010776	0.0039938	Dusp10
ENSMUSG00000072244	143.974	1.10913	0.286977	3.86488	0.000111146	0.00409011	Trim6
ENSMUSG00000046204	50.7011	1.57329	0.407071	3.86489	0.000111139	0.00409011	Pnma2
ENSMUSG00000003411	164.369	0.959665	0.24876	3.8578	0.000114414	0.0041956	Rab3b
ENSMUSG00000021384	35.6296	1.78478	0.464155	3.84523	0.000120439	0.00437999	Susd3
ENSMUSG00000078247	483.653	0.874072	0.227584	3.84066	0.000122703	0.00445247	Airn
ENSMUSG00000043300	237.71	0.929278	0.242398	3.83369	0.000126236	0.00454265	B3galnt1
ENSMUSG00000097121	259.3	0.902501	0.235401	3.83388	0.000126135	0.00454265	D130020L05Rik
ENSMUSG00000021087	143.155	0.994041	0.259333	3.83307	0.000126556	0.00454474	Rtn1
ENSMUSG00000070719	19.5214	2.30401	0.601185	3.83245	0.000126871	0.00454665	Pla2g4d
ENSMUSG00000025091	17.7326	2.49163	0.650685	3.82925	0.000128536	0.00458736	Pnliprp2
ENSMUSG00000025025	787.43	0.729841	0.190748	3.8262	0.000130137	0.00461599	Mxi1
ENSMUSG00000054863	77.7403	1.41813	0.371224	3.82016	0.000133366	0.0047056	Tafa5
ENSMUSG00000000579	69.3345	3.6871	0.966273	3.8158	0.000135745	0.00477586	Dynlt1c
ENSMUSG00000063594	27.6475	2.52002	0.660607	3.8147	0.000136348	0.00478734	Gng8
ENSMUSG00000056895	468.825	3.66998	0.963249	3.81	0.000138968	0.00485968	H2bu2
ENSMUSG00000049881	4490.46	0.666472	0.17558	3.79583	0.000147149	0.00508426	2810025M15Rik
ENSMUSG00000021591	1006.4	0.696643	0.183919	3.78776	0.000152012	0.00519871	Glrx
ENSMUSG00000074207	49.5166	1.78036	0.470395	3.78481	0.000153823	0.00522126	Adh1
ENSMUSG00000046794	110.374	1.07305	0.283566	3.78414	0.00015424	0.00522518	Ppp1r3b
ENSMUSG00000027907	1248.84	0.962425	0.25512	3.77244	0.000161658	0.00543404	S100a11
ENSMUSG00000026975	1822.29	0.783267	0.20848	3.75705	0.00017193	0.00574732	Dph7
ENSMUSG00000039670	642.27	0.703966	0.187422	3.75605	0.000172618	0.00575779	Oxld1
ENSMUSG00000039759	622.04	0.732045	0.195355	3.74725	0.000178782	0.00589033	Thap3
ENSMUSG00000003380	1606.19	0.769771	0.205391	3.74783	0.000178372	0.00589033	Rabac1
ENSMUSG00000036918	87.4304	1.24107	0.332363	3.73408	0.0001884	0.00613175	Ttc7
ENSMUSG00000006717	1977.95	0.847024	0.227007	3.73127	0.00019052	0.00618832	Acot13
ENSMUSG00000022893	102.292	1.09834	0.295739	3.71388	0.000204103	0.00659248	Adamts1
ENSMUSG00000020895	1874.31	0.686967	0.1851	3.71132	0.000206182	0.00663494	Tmem107
ENSMUSG00000032425	557.781	0.79124	0.213231	3.71072	0.000206674	0.00663843	Zfp949
ENSMUSG00000027713	101.053	1.42307	0.384745	3.69874	0.000216673	0.00687996	1810062G17Rik
ENSMUSG00000020799	310.317	0.81462	0.220263	3.69839	0.00021697	0.00687996	Tekt1
ENSMUSG00000039963	273.815	1.02621	0.277689	3.69555	0.000219409	0.00691938	Ccdc40
ENSMUSG00000022686	520.88	0.73394	0.199064	3.68695	0.000226956	0.00710528	B3gnt5
ENSMUSG00000032346	51.1439	1.40135	0.38134	3.6748	0.000238034	0.00735953	Ooep
ENSMUSG00000070605	308.24	0.848766	0.231055	3.67344	0.000239307	0.00735954	Zfp992
ENSMUSG00000116097	31.3413	1.69395	0.461433	3.67107	0.000241534	0.00740177	Gm36738
ENSMUSG00000033998	250.079	0.988981	0.269448	3.67039	0.000242178	0.00740842	Kcnk1
ENSMUSG00000039110	40.2808	1.60192	0.437586	3.66082	0.00025141	0.00761031	Mycbpap
ENSMUSG00000014177	815.238	0.687449	0.187821	3.66014	0.000252081	0.00761732	Tvp23b
ENSMUSG00000020381	1014.94	0.713081	0.195154	3.65394	0.000258242	0.00776291	Mrnip
ENSMUSG00000024059	72.6968	1.33872	0.36794	3.63843	0.000274307	0.00821737	Clip4
ENSMUSG00000031767	737.898	0.720073	0.198014	3.63647	0.000276396	0.00826567	Nudt7
ENSMUSG00000096140	31.331	1.81593	0.500301	3.62968	0.000283772	0.00845709	Ankrd66
ENSMUSG00000074802	341.288	0.774681	0.2136	3.62678	0.000286976	0.00853789	Gas2l3
ENSMUSG00000047844	1750.85	0.751435	0.207365	3.62373	0.000290385	0.0086098	Bex4
ENSMUSG00000027217	273.745	0.843744	0.233169	3.61859	0.000296212	0.00870917	Tspan18
ENSMUSG00000029228	47.861	1.71916	0.475038	3.61899	0.000295754	0.00870917	Lnx1
ENSMUSG00000105461	95.6209	4.24005	1.17224	3.61704	0.000297994	0.0087457	Gm4742
ENSMUSG00000031636	219.626	0.867217	0.239934	3.61441	0.000301036	0.00882005	Pdlim3
ENSMUSG00000056824	100.239	1.19415	0.331099	3.60661	0.000310218	0.0090578	Zfp663
ENSMUSG00000019718	307.537	0.87885	0.243706	3.6062	0.000310717	0.0090578	L3hypdh
ENSMUSG00000012123	156.004	0.947311	0.262891	3.60344	0.000314039	0.00912396	Crybg2
ENSMUSG00000078653	30.3865	1.70942	0.474622	3.60164	0.00031621	0.00917169	Cntd1
ENSMUSG00000000031	10103.2	0.66951	0.186667	3.58665	0.000334955	0.00968298	H19
ENSMUSG00000104986	134.491	1.1845	0.33085	3.58018	0.000343361	0.00982772	1600023N17Rik
ENSMUSG00000050777	145.522	1.20938	0.337907	3.57904	0.000344864	0.00983825	Tmem37
ENSMUSG00000044345	88.7443	1.09004	0.304829	3.5759	0.000349026	0.00994066	Marveld1
