# Supplementary material for: Glycolytic flux-signaling controls mouse embryo mesoderm development
Source: eLife. 2022 Dec 5;11:e83299. doi: 10.7554/eLife.83299 (PMC9771359; doi:10.7554/eLife.83299)
Supplement: Supplementary file 2. [file elife-83299-supp2.xlsx]

## Sheet: GOTerm_Tg_Down
GO-terms that were enriched in down-regulated DEGs in cytoPFKFB3 explants
Term	Descriptioin	Count	FDR
GO:0006357	regulation of transcription from RNA polymerase II promoter	63	1.1e-06
GO:0009952	anterior/posterior pattern specification	17	1.1e-06
GO:0007275	multicellular organism development	51	1.1e-06
GO:0045944	positive regulation of transcription from RNA polymerase II promoter	53	3.32e-06
GO:0001525	angiogenesis	23	3.71e-06
GO:0000122	negative regulation of transcription from RNA polymerase II promoter	45	3.71e-06
GO:0006355	regulation of transcription, DNA-templated	47	1.84e-05
GO:0090090	negative regulation of canonical Wnt signaling pathway	13	0.00196367
GO:0010629	negative regulation of gene expression	19	0.0117734
