# Supplementary material for: Glycolytic flux-signaling controls mouse embryo mesoderm development
Source: eLife. 2022 Dec 5;11:e83299. doi: 10.7554/eLife.83299 (PMC9771359; doi:10.7554/eLife.83299)
Supplement: Supplementary file 3. [file elife-83299-supp3.xlsx]

## Sheet: DEGs_FBP_DOWN _p0.01
row	baseMean	log2FoldChange	lfcSE	stat	pvalue	padj	symbol
ENSMUSG00000086126	1308.78	-3.39869	0.244434	-13.9043	5.96432e-44	5.17763e-40	Evx1os
ENSMUSG00000030717	616.369	-3.23026	0.263798	-12.2452	1.7823e-34	1.03148e-30	Nupr1
ENSMUSG00000035165	1069.38	-3.26747	0.306174	-10.6719	1.37745e-26	5.97884e-23	Kcne3
ENSMUSG00000055150	188.54	-3.6156	0.382248	-9.45879	3.11541e-21	9.01497e-18	Zfp78
ENSMUSG00000025408	2990.22	-2.1471	0.228778	-9.38505	6.28838e-21	1.5597e-17	Ddit3
ENSMUSG00000098332	520.067	-2.16744	0.233749	-9.27249	1.81849e-20	3.15727e-17	Pigbos1
ENSMUSG00000062944	123.793	-3.25859	0.352365	-9.24777	2.29228e-20	3.61805e-17	9130023H24Rik
ENSMUSG00000051319	649.032	-2.59978	0.281745	-9.22745	2.77156e-20	4.00999e-17	Mtln
ENSMUSG00000000489	178.353	-3.70212	0.407457	-9.08594	1.02811e-19	1.275e-16	Pdgfb
ENSMUSG00000026497	193.274	-3.18183	0.354208	-8.98292	2.63663e-19	3.05181e-16	Mixl1
ENSMUSG00000009633	153.918	-3.5465	0.410197	-8.64584	5.34087e-18	4.88043e-15	G0s2
ENSMUSG00000049950	917.05	-1.88763	0.225071	-8.38685	4.9935e-17	4.33486e-14	Rpp38
ENSMUSG00000017652	1256.96	-2.01899	0.24194	-8.345	7.12151e-17	5.62017e-14	Cd40
ENSMUSG00000048065	139.224	-4.01681	0.481067	-8.3498	6.83792e-17	5.62017e-14	Cyb5r2
ENSMUSG00000007777	2825.51	-1.8957	0.227433	-8.3352	7.73645e-17	5.84001e-14	0610009B22Rik
ENSMUSG00000020423	1634.45	-1.8368	0.221654	-8.28676	1.16374e-16	8.41866e-14	Btg2
ENSMUSG00000005397	309.204	-2.13622	0.258696	-8.25764	1.48581e-16	1.03186e-13	Nid1
ENSMUSG00000038510	3034.72	-1.66541	0.204364	-8.1492	3.66341e-16	2.44631e-13	Rpf2
ENSMUSG00000046909	1097.78	-2.12618	0.262081	-8.11268	4.95163e-16	3.18408e-13	Tefm
ENSMUSG00000074415	215.542	-2.25916	0.27919	-8.09184	5.87706e-16	3.53015e-13	Mir100hg
ENSMUSG00000024987	1702.27	-1.87772	0.232063	-8.09144	5.89647e-16	3.53015e-13	Cyp26a1
ENSMUSG00000032673	774.251	-1.85266	0.229295	-8.07979	6.48774e-16	3.75467e-13	Prorsd1
ENSMUSG00000043190	582.115	-1.93851	0.24556	-7.89421	2.92159e-15	1.58514e-12	Rfesd
ENSMUSG00000089889	162.623	-2.4203	0.310069	-7.8057	5.91712e-15	3.02156e-12	0610040B10Rik
ENSMUSG00000063894	254.32	-2.20297	0.284017	-7.75645	8.73406e-15	4.21224e-12	Zkscan8
ENSMUSG00000097195	7596.44	-1.54919	0.202355	-7.65581	1.92099e-14	8.77688e-12	Snhg5
ENSMUSG00000041445	161.337	-2.32481	0.303831	-7.65165	1.98419e-14	8.83321e-12	Mmrn2
ENSMUSG00000025381	8682.43	-1.71664	0.225584	-7.60974	2.74649e-14	1.16304e-11	Cnpy2
ENSMUSG00000030827	188.74	-2.97348	0.395292	-7.52223	5.38482e-14	2.1248e-11	Fgf21
ENSMUSG00000009900	663.552	-2.24735	0.303233	-7.41131	1.25055e-13	4.72e-11	Wnt3a
ENSMUSG00000025898	1117.48	-1.74683	0.237452	-7.35655	1.88718e-13	6.97132e-11	Cwf19l2
ENSMUSG00000101089	109.102	-2.90739	0.397189	-7.3199	2.48152e-13	8.79269e-11	2610016A17Rik
ENSMUSG00000042379	84.4159	-3.14574	0.432048	-7.281	3.3136e-13	1.15062e-10	Esm1
ENSMUSG00000029648	232.349	-2.09663	0.288244	-7.27381	3.4949e-13	1.18977e-10	Flt1
ENSMUSG00000038393	585.43	-1.85229	0.257686	-7.1882	6.56534e-13	2.11088e-10	Txnip
ENSMUSG00000039670	232.08	-2.1015	0.293295	-7.16512	7.77158e-13	2.45328e-10	Oxld1
ENSMUSG00000048450	414.053	-2.36708	0.331131	-7.14846	8.77577e-13	2.7208e-10	Msx1
ENSMUSG00000062619	623.911	-1.6212	0.228617	-7.09133	1.32826e-12	3.97606e-10	2310039H08Rik
ENSMUSG00000027435	232	-2.43486	0.343597	-7.0864	1.37649e-12	4.0506e-10	Cd93
ENSMUSG00000037010	92.3069	-2.80689	0.398758	-7.03908	1.9351e-12	5.59953e-10	Apln
ENSMUSG00000031026	94.6461	-2.77515	0.395567	-7.01562	2.28931e-12	6.51589e-10	Trim66
ENSMUSG00000020303	370.272	-2.84087	0.407019	-6.97971	2.95786e-12	8.28297e-10	Stc2
ENSMUSG00000057691	220.073	-1.92264	0.276284	-6.95893	3.42869e-12	9.44904e-10	Zfp746
ENSMUSG00000056501	75.8442	-2.60776	0.376147	-6.93281	4.12569e-12	1.102e-09	Cebpb
ENSMUSG00000028838	62.8244	-3.05139	0.444608	-6.8631	6.73797e-12	1.72036e-09	Extl1
ENSMUSG00000019846	156.639	-2.17712	0.317753	-6.85161	7.30236e-12	1.83744e-09	Lama4
ENSMUSG00000062960	253.28	-2.05782	0.300664	-6.84426	7.6871e-12	1.90662e-09	Kdr
ENSMUSG00000049904	614.003	-1.61164	0.236578	-6.81229	9.606e-12	2.31638e-09	Tmem17
ENSMUSG00000044881	438.88	-1.90341	0.279707	-6.80502	1.01036e-11	2.40299e-09	Coa4
ENSMUSG00000029923	243.654	-2.27439	0.335071	-6.78779	1.13863e-11	2.60117e-09	Rab19
ENSMUSG00000019301	67.0151	-3.58115	0.528569	-6.77518	1.2425e-11	2.80161e-09	Hsd17b1
ENSMUSG00000029346	154.111	-1.90279	0.28172	-6.7542	1.43627e-11	3.19699e-09	Srrd
ENSMUSG00000000317	135.341	-2.62487	0.390759	-6.71737	1.8503e-11	4.06645e-09	Bcl6b
ENSMUSG00000034486	128.348	-2.20458	0.330078	-6.67897	2.40626e-11	5.09483e-09	Gbx2
ENSMUSG00000030022	620.778	-1.94691	0.292113	-6.66491	2.6482e-11	5.47358e-09	Adamts9
ENSMUSG00000048495	1118.94	-1.56361	0.235426	-6.64163	3.10242e-11	6.1913e-09	Tyw5
ENSMUSG00000031534	205.712	-1.824	0.274589	-6.64265	3.08103e-11	6.1913e-09	Smim19
ENSMUSG00000021680	205.699	-2.34542	0.354575	-6.61475	3.72188e-11	7.3431e-09	Crhbp
ENSMUSG00000032121	503.651	-1.61772	0.244986	-6.60331	4.02064e-11	7.84342e-09	Tmem218
ENSMUSG00000023883	1527.36	-1.47909	0.225647	-6.55489	5.5682e-11	1.03952e-08	Phf10
ENSMUSG00000061762	65.1313	-2.74993	0.420953	-6.53262	6.46273e-11	1.19368e-08	Tac1
ENSMUSG00000028295	984.378	-1.41851	0.217819	-6.51233	7.39963e-11	1.35234e-08	Smim8
ENSMUSG00000031641	829.292	-1.60737	0.248009	-6.48109	9.10623e-11	1.62992e-08	Cbr4
ENSMUSG00000085696	2429.6	-1.68757	0.260464	-6.47912	9.22617e-11	1.63454e-08	Hoxaas3
ENSMUSG00000031993	205.074	-1.81915	0.281469	-6.46306	1.02606e-10	1.74651e-08	Snx19
ENSMUSG00000045316	408.452	-1.94254	0.301411	-6.44481	1.15747e-10	1.91391e-08	Fahd1
ENSMUSG00000037085	334.137	-2.16221	0.337821	-6.40045	1.54915e-10	2.53739e-08	Trmt12
ENSMUSG00000024868	1049.18	-1.68556	0.264144	-6.38122	1.75688e-10	2.85074e-08	Dkk1
ENSMUSG00000036850	3136.88	-1.53833	0.241756	-6.36316	1.97642e-10	3.14813e-08	Mrpl41
ENSMUSG00000066637	480.34	-1.43142	0.22712	-6.3025	2.9289e-10	4.50887e-08	Ttc32
ENSMUSG00000046380	70.0397	-2.84248	0.452813	-6.27738	3.44332e-10	5.1537e-08	Jrk
ENSMUSG00000085980	81.0653	-2.22102	0.355011	-6.2562	3.94476e-10	5.85375e-08	Gm12408
ENSMUSG00000034473	1451.21	-1.46454	0.23543	-6.2207	4.94951e-10	7.04372e-08	Sec22a
ENSMUSG00000041695	99.7247	-2.79276	0.449965	-6.20661	5.41393e-10	7.64201e-08	Kcnj2
ENSMUSG00000037419	380.172	-1.76552	0.28478	-6.1996	5.66057e-10	7.92571e-08	Endod1
ENSMUSG00000022321	89.7218	-2.17358	0.351121	-6.19039	6.00146e-10	8.33579e-08	Cdh10
ENSMUSG00000117924	2533.52	-1.2437	0.203144	-6.12224	9.22689e-10	1.2614e-07	Tmem223
ENSMUSG00000027800	92.6562	-3.07915	0.503766	-6.11225	9.82356e-10	1.30196e-07	Tm4sf1
ENSMUSG00000046111	848.025	-1.49138	0.243966	-6.11308	9.7729e-10	1.30196e-07	Cep295
ENSMUSG00000030282	988.34	-1.35082	0.221566	-6.09669	1.0829e-09	1.41363e-07	Cmas
ENSMUSG00000045854	868.026	-1.43807	0.237435	-6.0567	1.38939e-09	1.80019e-07	Lyrm2
ENSMUSG00000009145	299.148	-2.13307	0.35319	-6.03943	1.54658e-09	1.98902e-07	Dqx1
ENSMUSG00000002617	63.7446	-2.40334	0.400292	-6.00398	1.92544e-09	2.44011e-07	Zfp40
ENSMUSG00000032135	124.725	-2.27181	0.378494	-6.00224	1.94613e-09	2.44846e-07	Mcam
ENSMUSG00000065952	302.638	-1.64645	0.275526	-5.97566	2.2916e-09	2.82176e-07	Rps23rg1
ENSMUSG00000042659	845.813	-1.45418	0.244035	-5.95888	2.53965e-09	3.08346e-07	Arrdc4
ENSMUSG00000051444	233.031	-1.80951	0.304134	-5.94971	2.68612e-09	3.23864e-07	Bbs12
ENSMUSG00000030669	66.8289	-2.37612	0.40037	-5.9348	2.942e-09	3.52269e-07	Calca
ENSMUSG00000026989	431.558	-1.9028	0.322215	-5.90537	3.51854e-09	4.18417e-07	Dapl1
ENSMUSG00000079659	130.578	-1.76995	0.300224	-5.89544	3.73691e-09	4.41362e-07	Tmem243
ENSMUSG00000011256	547.052	-1.61021	0.273587	-5.88555	3.96725e-09	4.65402e-07	Adam19
ENSMUSG00000027102	1038.89	-1.36139	0.231457	-5.88185	4.05716e-09	4.69603e-07	Hoxd8
ENSMUSG00000050188	774.269	-1.71727	0.291918	-5.88269	4.03641e-09	4.69603e-07	Lsm10
ENSMUSG00000118346	1683.81	-1.4908	0.253525	-5.8803	4.09523e-09	4.7087e-07	Tmem179b
ENSMUSG00000043421	738.464	-1.40309	0.238966	-5.87149	4.31898e-09	4.9333e-07	Hilpda
ENSMUSG00000031871	179.61	-2.46465	0.420013	-5.86804	4.40986e-09	5.00419e-07	Cdh5
ENSMUSG00000001158	3761.68	-1.40921	0.24047	-5.86023	4.62232e-09	5.20902e-07	Snrnp27
ENSMUSG00000085175	120.383	-1.84998	0.315738	-5.85922	4.65037e-09	5.20902e-07	Gm11423
ENSMUSG00000024295	92.2733	-2.26057	0.386382	-5.85061	4.89774e-09	5.41621e-07	Cyp4f41-ps
ENSMUSG00000086158	612.676	-1.46366	0.250353	-5.84638	5.02382e-09	5.48964e-07	Ccpg1os
ENSMUSG00000034379	117.563	-2.38749	0.408378	-5.84626	5.02738e-09	5.48964e-07	Wdr5b
ENSMUSG00000086657	114.058	-1.83639	0.314629	-5.83668	5.32497e-09	5.70692e-07	Stamos
ENSMUSG00000078435	138.284	-1.89415	0.325466	-5.81982	5.89115e-09	6.27498e-07	AU041133
ENSMUSG00000041633	75.7302	-2.44712	0.421269	-5.80892	6.2877e-09	6.65653e-07	Kctd12b
ENSMUSG00000055900	208.551	-1.56357	0.269505	-5.80162	6.56778e-09	6.9109e-07	Tmem69
ENSMUSG00000037972	269.435	-1.58778	0.275111	-5.77143	7.86011e-09	8.12305e-07	Snn
ENSMUSG00000027575	276.45	-1.63241	0.283193	-5.7643	8.19982e-09	8.32546e-07	Arfgap1
ENSMUSG00000021716	1405.79	-1.39714	0.24335	-5.74125	9.39805e-09	9.37753e-07	Srek1ip1
ENSMUSG00000024273	1260.57	-1.3063	0.227623	-5.73886	9.53135e-09	9.40246e-07	2700062C07Rik
ENSMUSG00000028322	1833.77	-1.39088	0.243683	-5.70775	1.14476e-08	1.09809e-06	Exosc3
ENSMUSG00000026088	969.862	-1.25564	0.220042	-5.70639	1.15401e-08	1.10087e-06	Mitd1
ENSMUSG00000033728	199.896	-1.51619	0.265814	-5.70392	1.17081e-08	1.11079e-06	Lrrc14
ENSMUSG00000031503	969.084	-1.52424	0.268018	-5.68706	1.29243e-08	1.21952e-06	Col4a2
ENSMUSG00000000753	1143.03	-1.51769	0.268565	-5.6511	1.59427e-08	1.46893e-06	Serpinf1
ENSMUSG00000039307	69.0092	-2.1811	0.386058	-5.64967	1.60751e-08	1.46893e-06	Hexdc
ENSMUSG00000073940	351.536	-1.67663	0.296947	-5.64622	1.6401e-08	1.49086e-06	Hbb-bt
ENSMUSG00000022833	331.208	-1.44784	0.257182	-5.62962	1.80606e-08	1.6247e-06	Ccdc14
ENSMUSG00000032125	104.783	-2.11341	0.376775	-5.60921	2.03254e-08	1.77332e-06	Robo4
ENSMUSG00000010607	642.666	-1.41944	0.254027	-5.58775	2.30036e-08	1.987e-06	Pigyl
ENSMUSG00000030879	4312.16	-1.14523	0.205163	-5.58205	2.37704e-08	2.03301e-06	Mrpl17
ENSMUSG00000048351	883.594	-1.32353	0.237515	-5.57241	2.51236e-08	2.12778e-06	Coa7
ENSMUSG00000048755	256.453	-1.38525	0.248931	-5.56477	2.62493e-08	2.20164e-06	Mcat
ENSMUSG00000021094	138.153	-1.79659	0.323097	-5.56055	2.68928e-08	2.24477e-06	Dhrs7
ENSMUSG00000030615	2839.1	-1.24027	0.223121	-5.55876	2.717e-08	2.25706e-06	Tmem126a
ENSMUSG00000051074	55.8807	-2.54925	0.459436	-5.54866	2.87876e-08	2.38005e-06	4930579K19Rik
ENSMUSG00000040795	225.55	-1.61859	0.292598	-5.53178	3.17005e-08	2.59615e-06	Iqcc
ENSMUSG00000036120	286.532	-1.6714	0.302554	-5.52428	3.30841e-08	2.69674e-06	Rfxank
ENSMUSG00000068250	1075.24	-1.21107	0.219955	-5.50597	3.67142e-08	2.97865e-06	Amn1
ENSMUSG00000062753	125.876	-1.64357	0.299243	-5.49241	3.96485e-08	3.17225e-06	AI413582
ENSMUSG00000008540	5497.93	-1.53718	0.280154	-5.48692	4.08993e-08	3.25731e-06	Mgst1
ENSMUSG00000034973	168.671	-1.65016	0.300872	-5.4846	4.14411e-08	3.28539e-06	Dop1a
ENSMUSG00000021706	319.718	-1.32854	0.2424	-5.48076	4.23499e-08	3.32705e-06	Zfyve16
ENSMUSG00000092607	1114.57	-1.17014	0.214606	-5.45249	4.96689e-08	3.83267e-06	Scnm1
ENSMUSG00000069305	113.075	-2.3418	0.429786	-5.44876	5.0723e-08	3.89669e-06	H4c18
ENSMUSG00000051705	205.673	-1.69364	0.311313	-5.44031	5.31881e-08	4.015e-06	Senp8
ENSMUSG00000022701	677.168	-1.33496	0.245374	-5.44052	5.31249e-08	4.015e-06	Ccdc191
ENSMUSG00000035759	149.923	-1.88838	0.34883	-5.41346	6.18188e-08	4.60643e-06	Bbs10
ENSMUSG00000032305	185.194	-1.72154	0.3187	-5.40175	6.59944e-08	4.89656e-06	Fam219b
ENSMUSG00000073427	197.035	-1.54938	0.286981	-5.39888	6.70576e-08	4.95428e-06	Gm4924
ENSMUSG00000072582	3143.49	-1.09826	0.204199	-5.37837	7.51633e-08	5.50626e-06	Ptrh2
ENSMUSG00000030103	46.4655	-2.4339	0.454099	-5.35983	8.3298e-08	6.01136e-06	Bhlhe40
ENSMUSG00000035403	434.594	-1.31923	0.246954	-5.34202	9.19163e-08	6.56729e-06	Crb2
ENSMUSG00000085016	37.0385	-3.25766	0.611034	-5.33139	9.74652e-08	6.9352e-06	Gm11335
ENSMUSG00000020027	1159.7	-1.33654	0.250765	-5.32986	9.82858e-08	6.96506e-06	Socs2
ENSMUSG00000030159	153.885	-1.9096	0.358362	-5.32869	9.8922e-08	6.98164e-06	Clec1b
ENSMUSG00000040429	75.5706	-2.44944	0.460108	-5.32363	1.01718e-07	7.1211e-06	Mterf1a
ENSMUSG00000020705	1353.05	-1.11496	0.209471	-5.32275	1.0221e-07	7.12677e-06	Ddx42
ENSMUSG00000005503	607.799	-1.4779	0.278268	-5.31108	1.0898e-07	7.50839e-06	Evx1
ENSMUSG00000027314	88.5473	-2.03152	0.383892	-5.2919	1.21052e-07	8.17784e-06	Dll4
ENSMUSG00000021271	48.3051	-2.24921	0.426081	-5.27884	1.30002e-07	8.74844e-06	Zfp839
ENSMUSG00000029389	392.706	-1.33342	0.252965	-5.27116	1.35563e-07	9.05216e-06	Ddx55
ENSMUSG00000045435	2153.86	-1.33843	0.254072	-5.26791	1.37983e-07	9.10898e-06	Tmem60
ENSMUSG00000000120	426.782	-1.78946	0.339979	-5.26344	1.41384e-07	9.29815e-06	Ngfr
ENSMUSG00000043496	226.054	-1.63205	0.310243	-5.26057	1.43607e-07	9.4087e-06	Tril
ENSMUSG00000029823	743.367	-1.23332	0.234485	-5.25972	1.44276e-07	9.417e-06	Luc7l2
ENSMUSG00000005078	1034.42	-1.28583	0.245179	-5.24444	1.56755e-07	1.01174e-05	Jkamp
ENSMUSG00000030218	127.459	-1.62808	0.31056	-5.24239	1.58506e-07	1.01549e-05	Mgp
ENSMUSG00000001918	559.951	-1.63186	0.311792	-5.23383	1.66034e-07	1.05958e-05	Slc1a5
ENSMUSG00000022940	1376	-1.26188	0.241554	-5.224	1.75101e-07	1.10953e-05	Pigp
ENSMUSG00000015468	210.777	-1.68178	0.322153	-5.22042	1.78518e-07	1.12449e-05	Notch4
ENSMUSG00000078201	167.674	-1.51728	0.290857	-5.21656	1.82277e-07	1.14249e-05	Tmem203
ENSMUSG00000060950	70.1389	-1.9705	0.377911	-5.2142	1.84617e-07	1.15299e-05	Trmt61a
ENSMUSG00000036256	247.865	-1.61251	0.309391	-5.21187	1.86944e-07	1.15924e-05	Igfbp7
ENSMUSG00000099481	101.941	-1.99906	0.383559	-5.21186	1.86952e-07	1.15924e-05	Xndc1
ENSMUSG00000036214	139.79	-2.21237	0.425311	-5.20177	1.974e-07	1.20255e-05	Znrd1as
ENSMUSG00000033909	326.537	-1.45826	0.280795	-5.19333	2.06561e-07	1.24094e-05	Usp36
ENSMUSG00000073599	533.584	-1.51443	0.291685	-5.192	2.08048e-07	1.24556e-05	Ecscr
ENSMUSG00000015943	931.951	-1.13687	0.219191	-5.18668	2.14079e-07	1.27289e-05	Bola1
ENSMUSG00000022353	588.107	-1.27397	0.24588	-5.18128	2.20374e-07	1.30585e-05	Mtss1
ENSMUSG00000000579	51.2067	-2.41572	0.466437	-5.1791	2.22958e-07	1.31303e-05	Dynlt1c
ENSMUSG00000020099	448.703	-1.65734	0.32074	-5.16722	2.37602e-07	1.38431e-05	Unc5b
ENSMUSG00000071659	807.4	-1.15709	0.224807	-5.14704	2.64636e-07	1.51138e-05	Hnrnpul2
ENSMUSG00000027166	1251.64	-1.10804	0.215804	-5.13448	2.82923e-07	1.60526e-05	Dnajc24
ENSMUSG00000030123	161.06	-1.87642	0.366012	-5.12666	2.94923e-07	1.65889e-05	Plxnd1
ENSMUSG00000034940	119.141	-1.68355	0.328444	-5.12585	2.96197e-07	1.65889e-05	Synrg
ENSMUSG00000042821	145.603	-1.8663	0.364431	-5.12114	3.03689e-07	1.68455e-05	Snai1
ENSMUSG00000024140	84.6609	-1.86856	0.366349	-5.10049	3.38777e-07	1.86725e-05	Epas1
ENSMUSG00000025821	200.866	-1.40161	0.275275	-5.09168	3.54907e-07	1.94997e-05	Zfp282
ENSMUSG00000029446	5024.81	-1.40631	0.276823	-5.08017	3.77088e-07	2.03886e-05	Psph
ENSMUSG00000031997	145.847	-1.54078	0.303845	-5.07095	3.95841e-07	2.11714e-05	Trpc6
ENSMUSG00000055745	62.0098	-2.00679	0.396112	-5.06622	4.05801e-07	2.15459e-05	Rtl6
ENSMUSG00000036327	292.949	-1.49708	0.296232	-5.05373	4.33254e-07	2.27944e-05	Qsox2
ENSMUSG00000037007	315.472	-1.37207	0.271605	-5.05172	4.37852e-07	2.29667e-05	Zfp113
ENSMUSG00000038203	582.575	-1.25965	0.249623	-5.04619	4.5071e-07	2.34992e-05	Hoxa13
ENSMUSG00000028291	693.875	-1.41748	0.282105	-5.02465	5.04354e-07	2.58307e-05	Akirin2
ENSMUSG00000068302	435.601	-1.89818	0.378072	-5.02068	5.14878e-07	2.6215e-05	Noto
ENSMUSG00000046020	224.833	-1.42361	0.283769	-5.01678	5.25459e-07	2.66755e-05	Pofut1
ENSMUSG00000037531	3189.75	-1.1194	0.223923	-4.99905	5.76143e-07	2.87442e-05	Mrpl47
ENSMUSG00000029993	1515.55	-1.39334	0.27881	-4.99745	5.80929e-07	2.89e-05	Nfu1
ENSMUSG00000044562	108.685	-2.1997	0.440339	-4.99547	5.86917e-07	2.91144e-05	Rasip1
ENSMUSG00000037525	369.962	-1.43445	0.287862	-4.98311	6.25712e-07	3.08626e-05	Bcdin3d
ENSMUSG00000049106	233.772	-1.41484	0.284457	-4.97382	6.56463e-07	3.21056e-05	Dcaf5
ENSMUSG00000039167	92.615	-1.81643	0.366294	-4.95894	7.08778e-07	3.45669e-05	Adgrl4
ENSMUSG00000032714	239.764	-1.42853	0.288317	-4.95472	7.24342e-07	3.51286e-05	Syde1
ENSMUSG00000025810	219.749	-1.48801	0.300519	-4.95147	7.36546e-07	3.56209e-05	Nrp1
ENSMUSG00000102644	117.575	-1.73522	0.351746	-4.93315	8.09125e-07	3.86998e-05	Thap6
ENSMUSG00000044681	78.6445	-1.95755	0.39716	-4.92887	8.27048e-07	3.94484e-05	Cnpy1
ENSMUSG00000035235	242.754	-1.3767	0.279363	-4.928	8.30768e-07	3.95172e-05	Trim13
ENSMUSG00000051339	48.1116	-2.27389	0.461621	-4.92588	8.39822e-07	3.98388e-05	2900026A02Rik
ENSMUSG00000034744	181.702	-1.55433	0.315816	-4.92163	8.58243e-07	4.04913e-05	Nagk
ENSMUSG00000020599	172.811	-1.351	0.274806	-4.91621	8.82358e-07	4.11897e-05	Rgs9
ENSMUSG00000054435	119.139	-1.89108	0.384994	-4.91198	9.01608e-07	4.18549e-05	Gimap4
ENSMUSG00000027357	293.49	-1.36271	0.27815	-4.89919	9.62322e-07	4.45542e-05	Crls1
ENSMUSG00000040883	537.4	-1.2076	0.246878	-4.8915	1.0007e-06	4.60851e-05	Tmem205
ENSMUSG00000039850	160.94	-1.48363	0.303299	-4.89163	1.00002e-06	4.60851e-05	Endov
ENSMUSG00000038422	107.279	-2.313	0.472956	-4.89053	1.00566e-06	4.61912e-05	Hdhd3
ENSMUSG00000114828	16.9441	-4.61053	0.943508	-4.88658	1.02603e-06	4.70023e-05	AI463229
ENSMUSG00000015653	338.265	-1.26291	0.258527	-4.885	1.03431e-06	4.72569e-05	Steap2
ENSMUSG00000036523	3368.87	-1.11252	0.228053	-4.87833	1.06989e-06	4.87544e-05	Greb1
ENSMUSG00000062691	710.394	-1.20964	0.248044	-4.87672	1.07862e-06	4.90238e-05	Cebpzos
ENSMUSG00000040729	107.38	-1.57814	0.324946	-4.85662	1.19409e-06	5.35707e-05	Cep126
ENSMUSG00000036860	1866.28	-1.08861	0.224135	-4.85695	1.19209e-06	5.35707e-05	Mrpl55
ENSMUSG00000021958	911.386	-1.06652	0.219699	-4.85445	1.20721e-06	5.38805e-05	Pinx1
ENSMUSG00000074754	762.266	-1.21295	0.250504	-4.84203	1.28519e-06	5.69221e-05	Smim26
ENSMUSG00000021738	399.11	-1.37509	0.284038	-4.84122	1.29044e-06	5.70093e-05	Atxn7
ENSMUSG00000022175	144.373	-1.78907	0.370017	-4.83511	1.3307e-06	5.86386e-05	Lrp10
ENSMUSG00000060244	44.9224	-2.18327	0.452435	-4.82559	1.39591e-06	6.13563e-05	Alyref2
ENSMUSG00000045377	363.058	-1.24778	0.258665	-4.82392	1.40761e-06	6.17145e-05	Tmem88
ENSMUSG00000030317	183.668	-1.44564	0.299901	-4.82038	1.43287e-06	6.26636e-05	Timp4
ENSMUSG00000112117	55.2531	-2.17032	0.450988	-4.81237	1.4915e-06	6.47388e-05	Rmst
ENSMUSG00000027281	213.108	-1.36096	0.283305	-4.80388	1.55622e-06	6.70448e-05	Slx4ip
ENSMUSG00000117322	65.8598	-1.82304	0.379873	-4.79908	1.59399e-06	6.8333e-05	6330415G19Rik
ENSMUSG00000056468	415.664	-1.45778	0.303859	-4.79755	1.60619e-06	6.86865e-05	5730596B20Rik
ENSMUSG00000028830	109.817	-1.6072	0.335691	-4.78774	1.68668e-06	7.17749e-05	AU040320
ENSMUSG00000050628	103.216	-1.81906	0.38039	-4.78209	1.73485e-06	7.3108e-05	Ubald2
ENSMUSG00000040370	583.244	-1.29609	0.271231	-4.77855	1.76562e-06	7.37245e-05	Etfrf1
ENSMUSG00000041130	424.31	-1.46982	0.308211	-4.76888	1.85256e-06	7.67643e-05	Zfp598
ENSMUSG00000049164	205.934	-1.37845	0.289169	-4.76693	1.87054e-06	7.73245e-05	Zfp518a
ENSMUSG00000038539	133.114	-1.59805	0.336317	-4.7516	2.01812e-06	8.20576e-05	Atf5
ENSMUSG00000055943	3307.23	-1.20656	0.253977	-4.75069	2.02728e-06	8.21173e-05	Emc7
ENSMUSG00000039512	870.279	-1.36004	0.286294	-4.75051	2.02905e-06	8.21173e-05	Uhrf1bp1
ENSMUSG00000030077	77.7681	-1.79241	0.377977	-4.74213	2.11487e-06	8.47998e-05	Chl1
ENSMUSG00000000958	702.356	-1.08526	0.228904	-4.74114	2.1252e-06	8.48798e-05	Slc7a7
ENSMUSG00000021760	5413.57	-1.18912	0.250815	-4.741	2.12664e-06	8.48798e-05	Gpx8
ENSMUSG00000033082	22.4559	-2.95972	0.625021	-4.7354	2.18626e-06	8.68599e-05	Clec1a
ENSMUSG00000055866	46.3175	-2.08877	0.442204	-4.72355	2.31768e-06	9.16253e-05	Per2
ENSMUSG00000089824	213.808	-1.33495	0.282638	-4.72316	2.32203e-06	9.16253e-05	Rbm12
ENSMUSG00000039686	172.027	-1.41763	0.300265	-4.72125	2.34397e-06	9.22813e-05	Zer1
ENSMUSG00000070883	205.032	-1.26221	0.267534	-4.71793	2.38258e-06	9.33779e-05	Ccdc173
ENSMUSG00000030291	3254.11	-1.03419	0.219202	-4.71796	2.38221e-06	9.33779e-05	Med21
ENSMUSG00000010095	7545.71	-1.04838	0.223123	-4.69864	2.61901e-06	0.000101272	Slc3a2
ENSMUSG00000057894	602.42	-1.21761	0.259237	-4.69688	2.64169e-06	0.000101922	Zfp329
ENSMUSG00000048330	176.114	-1.36427	0.291275	-4.68377	2.81653e-06	0.000107948	Ric3
ENSMUSG00000054302	1578.44	-1.00344	0.214376	-4.68077	2.85797e-06	0.000109295	Eapp
ENSMUSG00000065572	9.00234	-6.58849	1.4082	-4.67867	2.88746e-06	0.00011018	Mir130b
ENSMUSG00000074398	62.915	-1.86763	0.399242	-4.67793	2.8979e-06	0.000110336	Gm15441
ENSMUSG00000039485	49.7223	-2.05295	0.439196	-4.67434	2.94903e-06	0.000112005	Tspyl4
ENSMUSG00000043831	71.9023	-1.7816	0.381829	-4.66596	3.07173e-06	0.000115938	Lysmd4
ENSMUSG00000029595	38.8448	-2.4038	0.515428	-4.66369	3.10585e-06	0.000116718	Lhx5
ENSMUSG00000072501	880.652	-1.20894	0.259512	-4.65852	3.1849e-06	0.000119173	Phf20l1
ENSMUSG00000042404	69.2582	-1.67867	0.360648	-4.6546	3.24616e-06	0.000120427	Dennd4b
ENSMUSG00000061461	1703.2	-1.07168	0.230404	-4.6513	3.29851e-06	0.000121848	Smim20
ENSMUSG00000015597	490.812	-1.18396	0.254625	-4.64981	3.32239e-06	0.00012247	Zfp318
ENSMUSG00000031502	660.75	-1.3661	0.29398	-4.64694	3.36903e-06	0.000123551	Col4a1
ENSMUSG00000059246	340.767	-1.29885	0.279521	-4.64669	3.37306e-06	0.000123551	Foxb1
ENSMUSG00000031631	336.846	-1.21873	0.263153	-4.63125	3.63462e-06	0.000131742	Cfap97
ENSMUSG00000056498	27.6785	-2.7952	0.60392	-4.62842	3.68466e-06	0.000133277	Tmem154
ENSMUSG00000049686	110.852	-1.52947	0.330571	-4.62675	3.71457e-06	0.000133802	Orai1
ENSMUSG00000085156	1537.39	-1.21337	0.262448	-4.62328	3.77722e-06	0.000135217	Snhg15
ENSMUSG00000062376	1052.35	-0.999635	0.216347	-4.62051	3.82789e-06	0.000136468	Borcs7
ENSMUSG00000036632	1747.96	-1.13454	0.245625	-4.61899	3.8562e-06	0.000137195	Alg5
ENSMUSG00000046753	688.354	-1.19705	0.259684	-4.60966	4.03332e-06	0.000142911	Ccdc66
ENSMUSG00000017299	331.668	-1.11824	0.242697	-4.60757	4.07401e-06	0.000143766	Dnttip1
ENSMUSG00000027985	1767.16	-1.2003	0.260486	-4.60794	4.06677e-06	0.000143766	Lef1
ENSMUSG00000020621	329.183	-1.20249	0.261198	-4.60373	4.14989e-06	0.000145851	Rdh14
ENSMUSG00000035601	1101.75	-1.17884	0.25619	-4.60144	4.19574e-06	0.000147164	Trmt10b
ENSMUSG00000021079	1737.44	-0.982716	0.213602	-4.60069	4.21103e-06	0.000147403	Timm9
ENSMUSG00000051235	734.344	-1.06304	0.231102	-4.59989	4.22704e-06	0.000147573	Gen1
ENSMUSG00000026723	182.389	-1.51337	0.329195	-4.59718	4.28254e-06	0.000148572	Trdmt1
ENSMUSG00000025082	280.878	-1.22854	0.267251	-4.59695	4.28721e-06	0.000148572	Vwa2
ENSMUSG00000048528	118.792	-1.50653	0.327905	-4.5944	4.3399e-06	0.0001498	Nkx1-2
ENSMUSG00000024592	273.493	-1.26643	0.275641	-4.5945	4.3379e-06	0.0001498	C330018D20Rik
ENSMUSG00000030960	1906.29	-0.995284	0.21683	-4.59016	4.42898e-06	0.000151968	Eef1akmt2
ENSMUSG00000040452	43.8589	-2.6566	0.58092	-4.57308	4.806e-06	0.000161665	Cdh12
ENSMUSG00000031982	223.396	-1.41828	0.310321	-4.57037	4.8687e-06	0.000163186	Arv1
ENSMUSG00000044258	453.807	-1.65712	0.363106	-4.56373	5.02531e-06	0.000167465	Ctla2a
ENSMUSG00000023809	286.09	-1.25126	0.274297	-4.56169	5.07425e-06	0.000168772	Rps6ka2
ENSMUSG00000002633	21.7553	-3.02001	0.662196	-4.5606	5.1008e-06	0.000169008	Shh
ENSMUSG00000039531	467.527	-1.28654	0.282082	-4.56086	5.09456e-06	0.000169008	Zup1
ENSMUSG00000024451	99.2081	-1.83245	0.401985	-4.55849	5.15217e-06	0.000170373	Arap3
ENSMUSG00000030170	640.013	-1.10326	0.242454	-4.55038	5.35492e-06	0.000175089	Wnt5b
ENSMUSG00000037971	1071.91	-1.04788	0.230724	-4.54169	5.58055e-06	0.000181441	1110032A03Rik
ENSMUSG00000031767	329.49	-1.34978	0.297376	-4.53897	5.65296e-06	0.000183109	Nudt7
ENSMUSG00000042857	29.8803	-2.87378	0.635545	-4.52175	6.13295e-06	0.000196747	Gm9776
ENSMUSG00000030604	66.1427	-1.86087	0.411899	-4.5178	6.24865e-06	0.000199428	Zfp626
ENSMUSG00000042599	757.774	-1.06686	0.236288	-4.51509	6.32907e-06	0.0002014	Kdm7a
ENSMUSG00000064325	40.4902	-2.33485	0.517184	-4.51455	6.34523e-06	0.0002014	Hhip
ENSMUSG00000023411	153.788	-1.47141	0.325902	-4.51489	6.33484e-06	0.0002014	Nfatc4
ENSMUSG00000038910	76.3839	-1.66739	0.369379	-4.51403	6.36075e-06	0.000201524	Plcl2
ENSMUSG00000001518	143.816	-1.50383	0.333364	-4.51106	6.45054e-06	0.000203626	Itfg2
ENSMUSG00000029924	1670.85	-1.07961	0.239767	-4.50272	6.70888e-06	0.000210632	Slc37a3
ENSMUSG00000070283	606.031	-1.11384	0.247467	-4.50095	6.76514e-06	0.000212015	Ndufaf3
ENSMUSG00000019890	286.484	-1.94338	0.432045	-4.4981	6.85642e-06	0.000214374	Nts
ENSMUSG00000035274	321.677	-1.23781	0.275202	-4.49783	6.86511e-06	0.000214374	Tpbg
ENSMUSG00000070526	160.129	-1.53342	0.341109	-4.4954	6.94401e-06	0.000216061	Peg12
ENSMUSG00000072915	134.253	-1.36886	0.304531	-4.49499	6.95741e-06	0.00021609	Gm12258
ENSMUSG00000033256	172.582	-1.39024	0.309629	-4.49003	7.12127e-06	0.000219999	Shf
ENSMUSG00000033126	113.63	-1.52552	0.340017	-4.4866	7.23686e-06	0.000223085	Ybey
ENSMUSG00000052565	139.799	-1.7984	0.401897	-4.47478	7.64913e-06	0.000234636	H1f3
ENSMUSG00000002803	140.313	-1.38057	0.308722	-4.4719	7.75265e-06	0.000236974	Btbd6
ENSMUSG00000089998	27.3708	-2.66253	0.596495	-4.46363	8.05827e-06	0.000245452	Phtf1os
ENSMUSG00000038855	89.6605	-1.50626	0.337581	-4.46191	8.12341e-06	0.000245837	Itpkb
ENSMUSG00000040345	118.94	-1.34214	0.300803	-4.46187	8.12474e-06	0.000245837	Arhgap9
ENSMUSG00000094910	198.717	-1.37387	0.30791	-4.46192	8.12297e-06	0.000245837	D430019H16Rik
ENSMUSG00000039210	384.679	-1.10605	0.247942	-4.46091	8.16125e-06	0.000245999	Gpatch2
ENSMUSG00000079669	47.4463	-1.9926	0.446663	-4.46108	8.1548e-06	0.000245999	Gm17396
ENSMUSG00000078784	2139.41	-1.13272	0.25414	-4.45709	8.30805e-06	0.000249127	Rbis
ENSMUSG00000028133	210.336	-1.46792	0.329411	-4.4562	8.34248e-06	0.000249728	Rwdd3
ENSMUSG00000002732	232.732	-1.69719	0.380994	-4.45464	8.40339e-06	0.000250687	Fkbp7
ENSMUSG00000036299	2551.24	-1.11693	0.251005	-4.44983	8.59376e-06	0.000255488	BC031181
ENSMUSG00000038387	191.305	-1.20269	0.270339	-4.44883	8.63389e-06	0.000256242	Rras
ENSMUSG00000042613	112.333	-1.62654	0.365755	-4.44708	8.7045e-06	0.000257897	Pbxip1
ENSMUSG00000035234	469.198	-1.47063	0.330853	-4.44497	8.79037e-06	0.000259115	Abraxas1
ENSMUSG00000028470	1670.67	-1.09412	0.246258	-4.44301	8.871e-06	0.00026104	Hint2
ENSMUSG00000018559	259.091	-1.34105	0.302015	-4.44034	8.98187e-06	0.000262973	Ctdnep1
ENSMUSG00000028403	164.216	-1.24957	0.282265	-4.42694	9.55785e-06	0.000277497	Zdhhc21
ENSMUSG00000029402	99.4817	-1.53356	0.347071	-4.41859	9.93473e-06	0.000286523	Snrnp35
ENSMUSG00000042594	241.457	-1.31471	0.297646	-4.41702	1.00072e-05	0.000288135	Sh2b3
ENSMUSG00000027080	580.064	-1.02531	0.232193	-4.41578	1.00647e-05	0.000289311	Med19
ENSMUSG00000020381	376.351	-1.47169	0.333345	-4.41493	1.01045e-05	0.000289973	Mrnip
ENSMUSG00000022061	24.4607	-2.5412	0.575719	-4.41395	1.015e-05	0.000290798	Nkx3-1
ENSMUSG00000005534	736.949	-1.05814	0.239869	-4.41134	1.02732e-05	0.000293844	Insr
ENSMUSG00000024493	7901.42	-0.993925	0.22536	-4.41038	1.03188e-05	0.000294662	Lars
ENSMUSG00000028461	733.185	-0.98732	0.224183	-4.40407	1.06237e-05	0.000300894	Ccdc107
ENSMUSG00000054400	548.11	-1.28835	0.292612	-4.40294	1.06794e-05	0.000301553	Cklf
ENSMUSG00000087519	30.1836	-2.69373	0.612544	-4.39762	1.09444e-05	0.000307472	AV039307
ENSMUSG00000069237	344.035	-1.443	0.328186	-4.39688	1.09816e-05	0.000308018	Fam8a1
ENSMUSG00000042293	487.488	-1.03682	0.236571	-4.38268	1.17229e-05	0.00032233	Gm5617
ENSMUSG00000021000	1768.39	-1.28126	0.292285	-4.38361	1.1673e-05	0.00032233	Mia2
ENSMUSG00000024668	1722.96	-1.06183	0.242289	-4.3825	1.17327e-05	0.00032233	Sdhaf2
ENSMUSG00000018820	103.272	-1.52077	0.347011	-4.38249	1.17332e-05	0.00032233	Zfyve27
ENSMUSG00000085912	30.9705	-2.35341	0.537071	-4.38193	1.17633e-05	0.000322646	Trp53cor1
ENSMUSG00000028795	424.695	-1.0694	0.244223	-4.3788	1.19334e-05	0.00032628	Ccdc28b
ENSMUSG00000022099	271.827	-1.27481	0.291181	-4.37807	1.19734e-05	0.000326859	Dmtn
ENSMUSG00000022412	397.616	-1.21498	0.277683	-4.37542	1.21199e-05	0.000330339	Mief1
ENSMUSG00000027957	166.052	-1.20722	0.276029	-4.37354	1.22247e-05	0.000332673	Slc35a3
ENSMUSG00000026502	258.734	-1.40024	0.320752	-4.36551	1.26826e-05	0.000342451	Desi2
ENSMUSG00000020648	82.168	-1.45735	0.335511	-4.34368	1.40117e-05	0.00036946	Dus4l
ENSMUSG00000036398	1694.54	-0.95837	0.220645	-4.34349	1.40234e-05	0.00036946	Ppp1r11
ENSMUSG00000091811	179.194	-1.36905	0.315456	-4.3399	1.42545e-05	0.000374519	Inafm1
ENSMUSG00000057103	80.6271	-1.82263	0.420471	-4.33474	1.45929e-05	0.000382146	Nat8f1
ENSMUSG00000034083	2323.65	-1.04552	0.241215	-4.3344	1.46159e-05	0.000382171	Ccdc174
ENSMUSG00000089682	115.848	-1.41103	0.326163	-4.32616	1.5173e-05	0.000393772	Bcl2l2
ENSMUSG00000030852	460.937	-1.22238	0.282596	-4.32555	1.52149e-05	0.00039427	Tacc2
ENSMUSG00000111375	49.336	-1.76972	0.40973	-4.31922	1.56578e-05	0.000402743	Btbd8
ENSMUSG00000029313	101.083	-1.43521	0.332395	-4.31779	1.57599e-05	0.00040417	Aff1
ENSMUSG00000056608	738.467	-1.00673	0.233298	-4.3152	1.59461e-05	0.000407141	Chd9
ENSMUSG00000057329	140.115	-1.23581	0.28659	-4.31213	1.61692e-05	0.000412232	Bcl2
ENSMUSG00000021714	1001.34	-1.00307	0.232674	-4.31107	1.62466e-05	0.000413597	Cenpk
ENSMUSG00000042104	336.305	-1.04387	0.242161	-4.31067	1.62764e-05	0.00041375	Uggt2
ENSMUSG00000020660	103.713	-1.37898	0.32047	-4.30298	1.68515e-05	0.000426496	Pomc
ENSMUSG00000074733	284.315	-1.1593	0.269441	-4.30259	1.68813e-05	0.000426627	Zfp950
ENSMUSG00000052419	1361.7	-0.920891	0.214097	-4.30128	1.69818e-05	0.000428542	2610001J05Rik
ENSMUSG00000110652	22.0185	-2.73408	0.636262	-4.2971	1.7305e-05	0.000434804	Gm33023
ENSMUSG00000073062	25.3836	-2.41268	0.561922	-4.29362	1.75786e-05	0.000441039	Zxdb
ENSMUSG00000033554	889.611	-1.0342	0.24091	-4.29291	1.76348e-05	0.000441812	Dph5
ENSMUSG00000080727	48.4529	-1.87564	0.436998	-4.29211	1.76986e-05	0.000442771	C920021L13Rik
ENSMUSG00000028407	181.203	-1.56453	0.364662	-4.29035	1.78395e-05	0.000444503	Smim27
ENSMUSG00000023156	1060.42	-1.2432	0.289772	-4.29028	1.78446e-05	0.000444503	Rpp14
ENSMUSG00000046675	799.08	-1.25092	0.291537	-4.29077	1.78058e-05	0.000444503	Tmem251
ENSMUSG00000038028	147.681	-1.48081	0.345794	-4.28236	1.84918e-05	0.000459964	Tigar
ENSMUSG00000026632	288.259	-1.16846	0.273387	-4.27399	1.92005e-05	0.0004741	Tatdn3
ENSMUSG00000026349	1304.38	-1.0927	0.255806	-4.2716	1.94075e-05	0.000477946	Ccnt2
ENSMUSG00000044548	220.74	-1.24591	0.292055	-4.26602	1.98992e-05	0.000487981	Dact1
ENSMUSG00000015652	499.525	-1.30294	0.305667	-4.26261	2.02055e-05	0.000494096	Steap1
ENSMUSG00000047789	340.317	-1.05157	0.247041	-4.25667	2.07495e-05	0.000505973	Slc38a9
ENSMUSG00000019808	631.499	-1.52595	0.358781	-4.25315	2.1078e-05	0.000513263	Adat2
ENSMUSG00000043683	171.541	-1.36421	0.320992	-4.24997	2.13796e-05	0.00051915	Fem1a
ENSMUSG00000066829	275.252	-1.31446	0.310322	-4.23579	2.27752e-05	0.000547677	Zfp810
ENSMUSG00000034211	4371.91	-0.88611	0.209246	-4.23478	2.28779e-05	0.000548749	Mrps17
ENSMUSG00000001240	390.704	-1.16625	0.275603	-4.23162	2.32013e-05	0.000555614	Ramp2
ENSMUSG00000026810	2470.08	-0.878082	0.207612	-4.22944	2.34271e-05	0.00055871	Dpm2
ENSMUSG00000027387	366.621	-1.05534	0.249509	-4.22968	2.34021e-05	0.00055871	Zc3h8
ENSMUSG00000075304	672.967	-1.06224	0.251319	-4.22667	2.3718e-05	0.000563327	Sp5
ENSMUSG00000036975	122.131	-1.59981	0.378658	-4.22495	2.38994e-05	0.000566861	Tmem177
ENSMUSG00000021186	233.978	-1.43738	0.34051	-4.22126	2.42935e-05	0.000573856	Fbln5
ENSMUSG00000001018	840.165	-1.50898	0.357509	-4.22083	2.4341e-05	0.000574195	Snapin
ENSMUSG00000074182	966.827	-1.02066	0.241874	-4.21982	2.44494e-05	0.000575972	Znhit6
ENSMUSG00000019837	3878.91	-0.864907	0.205199	-4.21496	2.49819e-05	0.000586922	Gtf3c6
ENSMUSG00000060969	61.7887	-1.88492	0.447843	-4.20888	2.56643e-05	0.000600516	Irx1
ENSMUSG00000101609	782.17	-1.10248	0.262249	-4.20395	2.62302e-05	0.000611287	Kcnq1ot1
ENSMUSG00000071654	2084.3	-0.877002	0.208836	-4.19949	2.67519e-05	0.000619571	Uqcc3
ENSMUSG00000068742	142.804	-1.20027	0.286675	-4.18686	2.82845e-05	0.000647856	Cry2
ENSMUSG00000071847	280.064	-1.39018	0.332428	-4.18191	2.89069e-05	0.000659502	Apcdd1
ENSMUSG00000075394	95.0471	-1.45851	0.348821	-4.18126	2.89895e-05	0.000660518	Hoxc4
ENSMUSG00000046085	28.6962	-2.46929	0.590808	-4.17951	2.92144e-05	0.000664254	4931422A03Rik
ENSMUSG00000034059	47.7566	-1.82776	0.438774	-4.16561	3.10522e-05	0.000699259	Ypel4
ENSMUSG00000038587	305.168	-1.32221	0.317533	-4.16399	3.12736e-05	0.000702656	Akap12
ENSMUSG00000041147	585.099	-1.0756	0.258402	-4.1625	3.14782e-05	0.000705192	Brca2
ENSMUSG00000079084	146.271	-1.21084	0.290979	-4.16128	3.16473e-05	0.000707155	Ccdc82
ENSMUSG00000025733	172.021	-1.35101	0.324686	-4.16098	3.16884e-05	0.000707164	Rhot2
ENSMUSG00000001657	315.917	-1.40319	0.337416	-4.15863	3.20161e-05	0.000712646	Hoxc8
ENSMUSG00000072889	399.113	-1.05737	0.254333	-4.15742	3.21867e-05	0.000713698	Nfxl1
ENSMUSG00000000194	414.267	-0.961841	0.231384	-4.1569	3.22598e-05	0.000714407	Gpr107
ENSMUSG00000052305	969.793	-1.22332	0.294801	-4.14963	3.33011e-05	0.000734655	Hbb-b1
ENSMUSG00000083816	74.5736	-1.56105	0.376642	-4.14465	3.40334e-05	0.000747959	Gm13033
ENSMUSG00000022941	251.034	-1.09241	0.263638	-4.14362	3.41867e-05	0.000750378	Ripply3
ENSMUSG00000026921	794.708	-0.949944	0.229335	-4.14217	3.44039e-05	0.000753241	Egfl7
ENSMUSG00000022485	153.579	-1.25453	0.303186	-4.1378	3.50651e-05	0.000765785	Hoxc5
ENSMUSG00000116138	24.4206	-2.41761	0.58509	-4.13204	3.59558e-05	0.000784252	C030006K11Rik
ENSMUSG00000026167	218.002	-1.68809	0.408776	-4.12962	3.6337e-05	0.000791571	Wnt10a
ENSMUSG00000085412	237.533	-1.25957	0.305195	-4.12711	3.67356e-05	0.000798253	Halr1
ENSMUSG00000024440	48.365	-2.03854	0.494537	-4.12211	3.7542e-05	0.000814756	Pcdh12
ENSMUSG00000038172	162.322	-1.35633	0.329084	-4.12152	3.76381e-05	0.000814804	Ttc39b
ENSMUSG00000019731	297.716	-1.05708	0.256553	-4.12031	3.78367e-05	0.000818083	Slc35e1
ENSMUSG00000088252	63.4219	-2.35572	0.572286	-4.11633	3.84948e-05	0.000828186	Snord13
ENSMUSG00000040841	90.1022	-1.34836	0.327704	-4.11456	3.87926e-05	0.000831502	Six5
ENSMUSG00000097503	80.8936	-1.44829	0.352316	-4.11078	3.94324e-05	0.000843134	3110045C21Rik
ENSMUSG00000027944	9124.36	-1.0548	0.256699	-4.10909	3.97222e-05	0.000848287	Hax1
ENSMUSG00000035941	1018.53	-0.943979	0.229878	-4.10644	4.01801e-05	0.00085596	Ibtk
ENSMUSG00000051169	157.317	-1.3821	0.336987	-4.10136	4.10733e-05	0.00087098	Rpusd3
ENSMUSG00000046516	228.414	-1.34276	0.3274	-4.10129	4.10858e-05	0.00087098	Cox17
ENSMUSG00000031021	770.693	-1.08398	0.264402	-4.09974	4.13611e-05	0.000875746	Tmem9b
ENSMUSG00000021967	1893.4	-0.911464	0.222413	-4.09807	4.16606e-05	0.000879942	Mrpl57
ENSMUSG00000097080	169.213	-1.33386	0.326498	-4.08535	4.40111e-05	0.000923966	1700086O06Rik
ENSMUSG00000112639	104.348	-1.39206	0.340916	-4.08329	4.44023e-05	0.00092877	A730063M14Rik
ENSMUSG00000087687	932.84	-1.39423	0.341615	-4.08129	4.47865e-05	0.000932354	Pet100
ENSMUSG00000032440	66.029	-1.73475	0.425266	-4.07921	4.51898e-05	0.000939624	Tgfbr2
ENSMUSG00000042286	108.207	-1.62184	0.397641	-4.07866	4.52953e-05	0.000939942	Stab1
ENSMUSG00000053646	321.833	-1.10709	0.271447	-4.07847	4.53336e-05	0.000939942	Plxnb1
ENSMUSG00000071064	156.491	-1.2097	0.296665	-4.07765	4.5493e-05	0.000941418	Zfp827
ENSMUSG00000085282	22.5851	-2.70404	0.663637	-4.07458	4.60984e-05	0.000950546	Gm15663
ENSMUSG00000022505	269.007	-1.14457	0.281029	-4.07279	4.64535e-05	0.000955598	Emp2
ENSMUSG00000030785	16.4638	-2.99356	0.7353	-4.07121	4.67699e-05	0.00096097	Cox6a2
ENSMUSG00000034610	1146.72	-0.917478	0.22554	-4.06792	4.74337e-05	0.00097116	Tut4
ENSMUSG00000028229	302.196	-1.01804	0.250486	-4.06425	4.81873e-05	0.000980806	Rmdn1
ENSMUSG00000021241	2116.95	-0.830073	0.204264	-4.06372	4.82968e-05	0.000981883	Isca2
ENSMUSG00000001655	2192.53	-0.983788	0.24232	-4.05987	4.91003e-05	0.000992408	Hoxc13
ENSMUSG00000009687	168.208	-1.30518	0.321507	-4.05958	4.91618e-05	0.000992497	Fxyd5
ENSMUSG00000033191	41.4309	-2.05082	0.505223	-4.05924	4.92325e-05	0.000992769	Tie1
ENSMUSG00000038268	155.42	-1.46294	0.360452	-4.05863	4.93621e-05	0.000993076	Ovca2
ENSMUSG00000026707	330.441	-1.03582	0.255258	-4.05792	4.95107e-05	0.000993763	Nsun6
ENSMUSG00000028549	763.17	-0.904643	0.222929	-4.05799	4.94979e-05	0.000993763	Itgb3bp
ENSMUSG00000055760	1675.62	-0.94467	0.233248	-4.05006	5.1204e-05	0.00102458	Gemin6
ENSMUSG00000039461	212.493	-1.18502	0.293087	-4.04324	5.27181e-05	0.00104965	Tcta
ENSMUSG00000091183	76.348	-1.58622	0.392292	-4.04347	5.26669e-05	0.00104965	Gm5141
ENSMUSG00000025645	191.141	-1.34044	0.331622	-4.04206	5.29835e-05	0.00105372	Ccdc51
ENSMUSG00000024901	1156.76	-1.04964	0.259848	-4.03945	5.35758e-05	0.00106307	Peli3
ENSMUSG00000029291	278.016	-1.13048	0.27998	-4.03772	5.39724e-05	0.00106971	Rufy3
ENSMUSG00000038188	40.375	-2.257	0.5591	-4.03684	5.41765e-05	0.00107131	Scarf1
ENSMUSG00000044145	118.862	-1.45938	0.361555	-4.03639	5.42802e-05	0.00107214	1810024B03Rik
ENSMUSG00000029708	93.7903	-1.28286	0.317854	-4.03599	5.43731e-05	0.00107276	Gcc1
ENSMUSG00000086629	131.695	-1.25208	0.310282	-4.03532	5.45286e-05	0.0010746	2810403D21Rik
ENSMUSG00000028560	1486.43	-1.02738	0.254768	-4.03261	5.5161e-05	0.00108583	Usp1
ENSMUSG00000020154	98.3978	-1.58775	0.393915	-4.03068	5.56156e-05	0.00109354	Ptprb
ENSMUSG00000058145	92.7128	-1.57807	0.391685	-4.02893	5.6032e-05	0.00109924	Adamts17
ENSMUSG00000034968	170.058	-1.25168	0.310713	-4.02842	5.61518e-05	0.00110035	Lbx2
ENSMUSG00000070436	981.17	-1.14037	0.283229	-4.02632	5.6656e-05	0.00110898	Serpinh1
ENSMUSG00000093606	125.945	-1.34903	0.335087	-4.02593	5.67513e-05	0.00110959	B130034C11Rik
ENSMUSG00000000901	128.738	-1.19667	0.29744	-4.02322	5.74074e-05	0.00111864	Mmp11
ENSMUSG00000027953	278.087	-1.12981	0.281175	-4.01819	5.86477e-05	0.00114025	Slc50a1
ENSMUSG00000044224	439.696	-1.06163	0.264266	-4.01729	5.88704e-05	0.0011433	Dnajc21
ENSMUSG00000020868	121.821	-1.25325	0.312154	-4.01484	5.94855e-05	0.00115266	Xylt2
ENSMUSG00000030509	286.396	-1.07424	0.267674	-4.01325	5.98882e-05	0.00115917	Asb7
ENSMUSG00000024212	201.952	-1.13553	0.282973	-4.01287	5.99845e-05	0.00115974	Mllt1
ENSMUSG00000016028	585.232	-1.15271	0.287505	-4.00935	6.08861e-05	0.00117196	Celsr1
ENSMUSG00000034463	287.654	-1.62271	0.405125	-4.00546	6.18961e-05	0.00118876	Scara3
ENSMUSG00000017188	2939.15	-0.982652	0.245523	-4.00227	6.27374e-05	0.00120359	Coa3
ENSMUSG00000061607	410.955	-0.930055	0.232427	-4.0015	6.29433e-05	0.0012062	Mdc1
ENSMUSG00000006235	209.704	-1.22394	0.306161	-3.99771	6.39574e-05	0.00122159	Epor
ENSMUSG00000013622	1986.3	-0.96978	0.242862	-3.99314	6.52043e-05	0.00124131	Atraid
ENSMUSG00000028717	33.5142	-2.48016	0.621442	-3.99097	6.5803e-05	0.00125113	Tal1
ENSMUSG00000006301	299.07	-1.06115	0.266454	-3.98248	6.81991e-05	0.00128424	Tmbim1
ENSMUSG00000036002	47.862	-1.83373	0.460443	-3.98253	6.81847e-05	0.00128424	Fam214b
ENSMUSG00000048550	101.333	-1.41906	0.356829	-3.97686	6.9832e-05	0.00131357	Thnsl1
ENSMUSG00000028102	536.365	-1.23301	0.310071	-3.97654	6.99242e-05	0.00131388	Pex11b
ENSMUSG00000100164	107.703	-1.34096	0.337323	-3.97531	7.0287e-05	0.00131927	2610306M01Rik
ENSMUSG00000036840	409.829	-0.971108	0.244732	-3.96805	7.24641e-05	0.00135573	Siah1a
ENSMUSG00000026154	1448.73	-0.956194	0.241489	-3.95958	7.50825e-05	0.00139869	Sdhaf4
ENSMUSG00000039087	149.449	-1.11225	0.281082	-3.95702	7.58892e-05	0.00141069	Rreb1
ENSMUSG00000044337	83.6291	-1.55013	0.391926	-3.95516	7.64839e-05	0.00141871	Ackr3
ENSMUSG00000041482	100.227	-1.29853	0.328845	-3.94878	7.85519e-05	0.00144345	Piezo2
ENSMUSG00000025219	438.417	-0.898582	0.227562	-3.94873	7.85656e-05	0.00144345	Fgf8
ENSMUSG00000097616	106.896	-1.25457	0.317904	-3.94638	7.93416e-05	0.00145309	1110019D14Rik
ENSMUSG00000019437	216.806	-1.19092	0.301764	-3.94653	7.92934e-05	0.00145309	Tlcd1
ENSMUSG00000060487	45.4412	-1.61706	0.411013	-3.93433	8.34286e-05	0.00151899	Samd5
ENSMUSG00000055633	96.3928	-1.38211	0.351438	-3.93272	8.39917e-05	0.00152538	Zfp580
ENSMUSG00000000167	271.931	-1.01311	0.257608	-3.93275	8.39796e-05	0.00152538	Pih1d2
ENSMUSG00000090523	157.466	-1.29804	0.330312	-3.92975	8.50333e-05	0.00154107	Gypc
ENSMUSG00000029629	1586.36	-0.831946	0.212069	-3.923	8.74547e-05	0.00157673	Phf14
ENSMUSG00000032733	46.0091	-1.81802	0.463529	-3.92212	8.77717e-05	0.00157916	Snx33
ENSMUSG00000043866	371.674	-1.08095	0.275861	-3.91844	8.91245e-05	0.00159633	Taf10
ENSMUSG00000024352	145.818	-1.24692	0.318259	-3.91792	8.93146e-05	0.00159633	Spata24
ENSMUSG00000091337	700.439	-1.0255	0.261923	-3.91527	9.03043e-05	0.00160579	Eid1
ENSMUSG00000028145	212.707	-1.19803	0.306015	-3.91495	9.04215e-05	0.00160579	Them4
ENSMUSG00000047843	133.031	-1.43083	0.365482	-3.91491	9.04364e-05	0.00160579	Bri3
ENSMUSG00000037933	188.809	-1.14616	0.292702	-3.91579	9.01101e-05	0.00160579	Bicd2
ENSMUSG00000041075	235.217	-1.18689	0.303332	-3.91284	9.12174e-05	0.00161769	Fzd7
ENSMUSG00000063145	442.802	-1.26137	0.322396	-3.9125	9.13474e-05	0.00161834	Bbs5
ENSMUSG00000036672	296.034	-0.991253	0.253488	-3.91046	9.21218e-05	0.0016304	Cenpt
ENSMUSG00000079045	40.4436	-1.77895	0.455227	-3.90782	9.31313e-05	0.00164324	Prox1os
ENSMUSG00000003135	319.475	-0.981324	0.251269	-3.90547	9.40415e-05	0.00165593	Cnot11
ENSMUSG00000085837	21.3679	-2.34641	0.601066	-3.90375	9.47139e-05	0.0016644	Kcnmb4os2
ENSMUSG00000095362	189.229	-1.12563	0.288474	-3.90202	9.53933e-05	0.00167295	Gm14325
ENSMUSG00000021097	193.641	-1.0667	0.273461	-3.90073	9.59038e-05	0.0016802	Clmn
ENSMUSG00000090191	55.5785	-1.74481	0.447388	-3.9	9.61946e-05	0.0016819	9230105E05Rik
ENSMUSG00000031681	379.266	-1.02856	0.264001	-3.89604	9.77796e-05	0.00170276	Smad1
ENSMUSG00000051671	850.005	-0.836759	0.215097	-3.89014	0.000100185	0.00173768	Coa6
ENSMUSG00000042328	205.857	-1.18271	0.304064	-3.88966	0.000100383	0.00173937	Hps4
ENSMUSG00000058407	6093.53	-0.846189	0.217658	-3.88769	0.000101202	0.00175181	Txndc9
ENSMUSG00000037754	117.181	-1.49169	0.383952	-3.8851	0.000102287	0.00176181	Ppp1r16b
ENSMUSG00000070284	71.428	-1.64627	0.423693	-3.88552	0.000102109	0.00176181	Gmppb
ENSMUSG00000009216	66.3052	-1.69035	0.435149	-3.88454	0.000102524	0.0017624	Fam163b
ENSMUSG00000047735	19.7139	-2.49568	0.642434	-3.88472	0.000102447	0.0017624	Samd9l
ENSMUSG00000022197	332.865	-1.06887	0.275308	-3.88245	0.000103411	0.00177413	Pdzd2
ENSMUSG00000056445	426.812	-0.978962	0.252282	-3.88042	0.000104276	0.00178368	Hoxaas2
ENSMUSG00000031523	824.215	-1.17128	0.302003	-3.87838	0.000105154	0.00179517	Dlc1
ENSMUSG00000051154	2573.82	-0.808719	0.208608	-3.87675	0.000105862	0.00180548	Commd3
ENSMUSG00000027942	663.709	-0.858988	0.221749	-3.8737	0.000107194	0.00181991	4933434E20Rik
ENSMUSG00000042505	735.142	-0.921274	0.237833	-3.87362	0.000107232	0.00181991	Sdhaf3
ENSMUSG00000051257	35.8471	-2.25494	0.582184	-3.87324	0.000107398	0.00182094	Trap1a
ENSMUSG00000091896	506.835	-0.956157	0.247103	-3.86947	0.000109072	0.00184392	Ube2d2a
ENSMUSG00000017781	873.324	-0.94163	0.243438	-3.86805	0.00010971	0.0018511	Pitpna
ENSMUSG00000091405	109.989	-1.72297	0.445527	-3.86726	0.000110064	0.00185347	H4c14
ENSMUSG00000045671	342.11	-1.04817	0.271148	-3.86567	0.000110786	0.00186383	Spred2
ENSMUSG00000034532	301.386	-1.14025	0.295101	-3.86393	0.000111575	0.00187254	Fbxo16
ENSMUSG00000090223	277.944	-1.31455	0.340275	-3.86322	0.000111904	0.00187537	Pcp4
ENSMUSG00000039163	1046.68	-0.807904	0.209205	-3.86179	0.00011256	0.00188273	Cmc1
ENSMUSG00000035829	94.3694	-1.23806	0.320932	-3.8577	0.000114458	0.00190896	Ppp1r26
ENSMUSG00000026235	1466.83	-0.855377	0.221758	-3.85726	0.000114665	0.00191056	Epha4
ENSMUSG00000049940	299.613	-1.13642	0.294862	-3.85408	0.000116166	0.00193002	Pgrmc2
ENSMUSG00000026915	2588.6	-0.844927	0.21934	-3.85213	0.000117095	0.00194174	Strbp
ENSMUSG00000097290	210.842	-0.987206	0.256331	-3.85129	0.000117497	0.00194655	1300002E11Rik
ENSMUSG00000031901	217.013	-1.29708	0.336868	-3.8504	0.000117923	0.00195174	Dus2
ENSMUSG00000024446	1671.93	-0.903215	0.234669	-3.84889	0.000118656	0.00196201	Rpp21
ENSMUSG00000113902	2860.65	-1.21074	0.314731	-3.84691	0.000119619	0.00197138	Ndufb1
ENSMUSG00000080717	292.653	-0.94642	0.246072	-3.84611	0.000120006	0.00197138	B230307C23Rik
ENSMUSG00000054387	1053.68	-0.839418	0.218396	-3.84355	0.000121265	0.00198283	Mdm4
ENSMUSG00000037628	588.155	-0.911285	0.237107	-3.84335	0.000121368	0.00198283	Cdkn3
ENSMUSG00000058385	87.4265	-1.94431	0.505869	-3.84352	0.000121284	0.00198283	H2bc8
ENSMUSG00000032740	1189.64	-0.88026	0.229182	-3.84089	0.000122591	0.00199291	Ccdc88a
ENSMUSG00000048280	133.945	-1.13333	0.295129	-3.84011	0.000122978	0.00199732	Zfp738
ENSMUSG00000021244	711.483	-0.951919	0.247962	-3.83897	0.000123553	0.0020048	Ylpm1
ENSMUSG00000039960	231.815	-1.17145	0.305432	-3.83538	0.000125372	0.00202672	Rhou
ENSMUSG00000035314	33.3004	-2.20578	0.575566	-3.83236	0.000126918	0.00204222	Gdpd5
ENSMUSG00000062054	2049.14	-0.869517	0.226927	-3.8317	0.000127261	0.00204584	Iah1
ENSMUSG00000057337	66.9199	-1.59425	0.416171	-3.83075	0.000127754	0.00204869	Chst3
ENSMUSG00000032501	156.725	-1.20688	0.315057	-3.83067	0.000127792	0.00204869	Trib1
ENSMUSG00000019802	746.194	-0.926954	0.242045	-3.82967	0.000128315	0.00205205	Sec63
ENSMUSG00000000782	429.079	-1.10689	0.289037	-3.82959	0.000128357	0.00205205	Tcf7
ENSMUSG00000038543	270.241	-1.11362	0.29089	-3.82831	0.000129026	0.00206086	BC028528
ENSMUSG00000020483	855.075	-1.05428	0.275551	-3.82607	0.000130205	0.00207397	Dynll2
ENSMUSG00000016495	1162.25	-0.934017	0.244151	-3.82557	0.000130471	0.00207629	Plgrkt
ENSMUSG00000037747	95.7603	-1.57279	0.411465	-3.82242	0.000132147	0.0020971	Phyhipl
ENSMUSG00000025134	1845.84	-0.953004	0.249485	-3.81989	0.000133513	0.00211309	Alyref
ENSMUSG00000031627	436.718	-1.0667	0.279417	-3.81759	0.000134759	0.00212893	Irf2
ENSMUSG00000034501	353.388	-0.927136	0.243297	-3.81072	0.000138564	0.00217715	Pcnx4
ENSMUSG00000028893	313.602	-1.1746	0.308529	-3.80711	0.000140599	0.00220513	Sesn2
ENSMUSG00000035284	218.892	-1.1134	0.292506	-3.80643	0.000140988	0.00220923	Vps13c
ENSMUSG00000001029	85.4428	-1.27966	0.33637	-3.80432	0.000142192	0.00222208	Icam2
ENSMUSG00000016494	591.666	-0.903683	0.237805	-3.8001	0.000144637	0.00225277	Cd34
ENSMUSG00000038151	69.1938	-1.75607	0.462118	-3.80004	0.000144674	0.00225277	Prdm1
ENSMUSG00000097519	62.8713	-1.75849	0.462871	-3.79909	0.000145226	0.00225562	4930558J18Rik
ENSMUSG00000090698	153.554	-1.26275	0.332405	-3.79884	0.000145377	0.00225562	Apold1
ENSMUSG00000038415	16.8289	-2.87056	0.757131	-3.79137	0.000149818	0.00231418	Foxq1
ENSMUSG00000020630	323.177	-1.1543	0.304538	-3.79034	0.00015044	0.00231761	Rnaseh1
ENSMUSG00000026181	272.41	-1.08986	0.287558	-3.79003	0.000150629	0.00231846	Ppm1f
ENSMUSG00000016833	1482.94	-0.80681	0.213165	-3.78491	0.000153764	0.00235708	Mrps18c
ENSMUSG00000021994	3456.47	-0.805798	0.21288	-3.78523	0.000153566	0.00235708	Wnt5a
ENSMUSG00000023034	57.6378	-1.85366	0.490107	-3.78216	0.000155473	0.00237826	Nr4a1
ENSMUSG00000036819	331.962	-1.13585	0.300488	-3.78002	0.000156813	0.00239454	Jmjd4
ENSMUSG00000085555	94.2401	-1.60282	0.424316	-3.77742	0.000158459	0.00241118	2610035F20Rik
ENSMUSG00000096210	2694.03	-0.838452	0.222072	-3.77558	0.000159633	0.00242692	H1f0
ENSMUSG00000014550	695.254	-0.885069	0.234512	-3.77408	0.0001606	0.00243949	Rbsn
ENSMUSG00000014554	1350.13	-0.928139	0.245978	-3.77327	0.000161124	0.00244532	Dguok
ENSMUSG00000067722	1625.52	-0.820777	0.217684	-3.77049	0.000162928	0.00246838	BC003965
ENSMUSG00000039474	60.8714	-1.4374	0.381394	-3.7688	0.000164031	0.00248076	Wfs1
ENSMUSG00000029097	94.1331	-1.19143	0.31655	-3.76379	0.000167358	0.00252228	Trmt44
ENSMUSG00000061313	632.27	-0.887092	0.235806	-3.76196	0.000168584	0.00253635	Ddhd2
ENSMUSG00000019303	1252.28	-0.907161	0.241573	-3.75523	0.000173184	0.00259656	Psmc3ip
ENSMUSG00000051502	112.884	-1.2392	0.330273	-3.75204	0.0001754	0.00262752	Ufsp1
ENSMUSG00000049536	422.939	-0.889338	0.23728	-3.74805	0.000178218	0.00266403	Tceal1
ENSMUSG00000041530	917.018	-0.85446	0.227982	-3.74793	0.000178297	0.00266403	Ago1
ENSMUSG00000032698	4518.47	-0.955412	0.255048	-3.74601	0.000179668	0.0026753	Lmo2
ENSMUSG00000036430	635.857	-1.12793	0.301309	-3.74344	0.000181517	0.00268896	Tbcc
ENSMUSG00000062931	348.824	-0.962775	0.25732	-3.74155	0.000182889	0.00270471	Zfp938
ENSMUSG00000058773	2849.15	-0.98603	0.263585	-3.74084	0.000183404	0.00271001	H1f5
ENSMUSG00000047446	1354	-0.936239	0.250404	-3.73891	0.000184821	0.00272237	Arl4a
ENSMUSG00000053508	235.694	-1.16554	0.311738	-3.73885	0.000184867	0.00272237	Gtsf2
ENSMUSG00000095115	59.2545	-1.56664	0.419059	-3.73847	0.000185142	0.0027241	Itpripl2
ENSMUSG00000039065	601.202	-0.914104	0.244987	-3.73124	0.000190543	0.00278703	Atpsckmt
ENSMUSG00000046027	378.766	-1.18399	0.317403	-3.73025	0.000191286	0.00279555	Stard5
ENSMUSG00000086427	832.077	-0.932799	0.250488	-3.72392	0.00019615	0.00285461	Hoxa11os
ENSMUSG00000032062	473.738	-0.997315	0.26785	-3.72341	0.00019655	0.00285755	2310030G06Rik
ENSMUSG00000044442	689.58	-0.867408	0.232972	-3.72322	0.000196695	0.00285755	N6amt1
ENSMUSG00000036181	283.926	-1.05612	0.28401	-3.71859	0.000200341	0.00289466	H1f2
ENSMUSG00000054944	30.0418	-2.05098	0.551561	-3.71851	0.000200402	0.00289466	5330416C01Rik
ENSMUSG00000050989	356.924	-1.00239	0.269636	-3.71755	0.000201166	0.00290166	Selenon
ENSMUSG00000012422	4697.26	-0.832101	0.223835	-3.71748	0.000201221	0.00290166	Tmem167
ENSMUSG00000066026	338.806	-1.07084	0.288195	-3.71566	0.000202677	0.00291234	Dhrs3
ENSMUSG00000029815	1568.38	-0.857008	0.230756	-3.71391	0.000204078	0.00292584	Malsu1
ENSMUSG00000099632	136.931	-1.21837	0.328146	-3.71289	0.000204904	0.00293527	2900093K20Rik
ENSMUSG00000029007	319.243	-0.919216	0.247712	-3.71082	0.000206587	0.0029545	Agtrap
ENSMUSG00000022623	25.6505	-2.34283	0.631475	-3.71008	0.000207193	0.00296072	Shank3
ENSMUSG00000038628	3133.06	-0.791633	0.2134	-3.70961	0.000207577	0.00296377	Polr3k
ENSMUSG00000042814	1038.52	-0.900776	0.242895	-3.70849	0.000208495	0.00296731	Mcts2
ENSMUSG00000050891	1196.9	-0.76937	0.207474	-3.70827	0.000208679	0.00296731	Tatdn1
ENSMUSG00000030188	1109.01	-0.788695	0.213	-3.7028	0.000213232	0.00302216	Magohb
ENSMUSG00000099250	33.8003	-2.74419	0.741615	-3.70029	0.000215357	0.00304481	Rn7s2
ENSMUSG00000006050	3165.56	-0.803099	0.217111	-3.69903	0.000216422	0.00305489	Sra1
ENSMUSG00000022194	354.954	-1.37488	0.371788	-3.69804	0.000217274	0.00306017	Bcl2l2
ENSMUSG00000029911	7915.92	-0.762148	0.206171	-3.69669	0.000218432	0.00306651	Ssbp1
ENSMUSG00000049960	2548.8	-0.789239	0.213478	-3.69705	0.000218118	0.00306651	Mrps16
ENSMUSG00000074886	320.614	-0.894475	0.242082	-3.69493	0.000219946	0.00308208	Grk6
ENSMUSG00000044452	293.172	-1.03921	0.28136	-3.69354	0.000221158	0.00309657	Zfp507
ENSMUSG00000004221	300.671	-0.935354	0.253436	-3.69069	0.000223648	0.0031264	Ikbkg
ENSMUSG00000025198	277.799	-0.931417	0.252458	-3.6894	0.000224786	0.00313977	Erlin1
ENSMUSG00000042988	34.4657	-1.82717	0.496157	-3.68265	0.000230819	0.00321628	Notum
ENSMUSG00000068267	136.252	-1.09711	0.297968	-3.68196	0.000231447	0.00321985	Cenpb
ENSMUSG00000059142	433.855	-1.48244	0.402887	-3.67956	0.000233641	0.00324259	Zfp945
ENSMUSG00000060548	1567.93	-0.88871	0.241744	-3.67624	0.000236697	0.00327715	Tnfrsf19
ENSMUSG00000040272	189.735	-1.14154	0.310668	-3.67447	0.000238345	0.00329732	Accs
ENSMUSG00000037169	725.19	-0.931794	0.253772	-3.67178	0.000240869	0.00332749	Mycn
ENSMUSG00000022270	79.7955	-1.28272	0.349349	-3.67174	0.000240909	0.00332749	Retreg1
ENSMUSG00000101856	42.7717	-1.70013	0.463289	-3.6697	0.000242832	0.0033514	1700096K18Rik
ENSMUSG00000024276	517.239	-1.01654	0.277139	-3.66799	0.000244468	0.00336861	Zfp397
ENSMUSG00000021917	6352.31	-0.888782	0.242443	-3.66594	0.000246428	0.0033903	Spcs1
ENSMUSG00000043311	27.6941	-1.9531	0.533518	-3.6608	0.000251433	0.00344817	D17H6S53E
ENSMUSG00000016940	186.052	-1.10718	0.302517	-3.6599	0.00025231	0.00345474	Kctd2
ENSMUSG00000025409	157.309	-1.26205	0.344914	-3.65901	0.000253189	0.00346404	Mbd6
ENSMUSG00000032667	686.646	-0.984545	0.269333	-3.65549	0.000256692	0.00350921	Pon2
ENSMUSG00000040613	47.6985	-1.65399	0.45257	-3.65465	0.00025753	0.00351789	Apobec1
ENSMUSG00000021504	117.707	-1.15727	0.317524	-3.64467	0.000267739	0.00364016	B4galt7
ENSMUSG00000078452	122.311	-1.48135	0.406557	-3.64365	0.000268797	0.00365169	Raet1a
ENSMUSG00000024168	138.993	-1.16653	0.320213	-3.64297	0.000269507	0.00365561	Tmem204
ENSMUSG00000074916	179.979	-1.13079	0.310508	-3.64174	0.000270807	0.00367037	Chst14
ENSMUSG00000058240	1498.11	-0.85583	0.235026	-3.64143	0.000271132	0.00367191	Cryzl1
ENSMUSG00000024907	42.0979	-1.75801	0.482937	-3.64025	0.000272375	0.003683	Gal
ENSMUSG00000039182	672.331	-1.28708	0.353917	-3.63667	0.000276189	0.00372876	AW209491
ENSMUSG00000048581	61.9611	-1.51495	0.416719	-3.63543	0.000277518	0.00373799	E130311K13Rik
ENSMUSG00000100017	34.1831	-1.88062	0.517303	-3.63544	0.000277508	0.00373799	2410022M11Rik
ENSMUSG00000028057	769.737	-0.972601	0.267921	-3.63017	0.000283231	0.00380609	Rit1
ENSMUSG00000034647	376.369	-0.844409	0.232832	-3.62669	0.000287078	0.00384665	Ankrd12
ENSMUSG00000056531	445.477	-0.884032	0.243927	-3.62417	0.000289888	0.00387454	Ccdc18
ENSMUSG00000027864	587.434	-0.971109	0.268873	-3.61178	0.000304106	0.00403637	Ptgfrn
ENSMUSG00000027770	927.065	-0.847034	0.234667	-3.60952	0.000306764	0.00406103	Dhx36
ENSMUSG00000032370	497.877	-0.925027	0.256276	-3.6095	0.000306786	0.00406103	Lactb
ENSMUSG00000069835	340.129	-0.922299	0.255526	-3.60942	0.000306881	0.00406103	Sat2
ENSMUSG00000040717	1227.87	-0.949392	0.263057	-3.60908	0.000307285	0.00406327	Il17rd
ENSMUSG00000058900	39.184	-1.7404	0.482849	-3.60443	0.00031284	0.0041273	Rsl1
ENSMUSG00000046658	53.76	-1.48752	0.412728	-3.60413	0.000313201	0.00412872	Zfp316
ENSMUSG00000028578	413.479	-1.20615	0.334816	-3.60242	0.000315266	0.0041467	Caap1
ENSMUSG00000034738	84.7928	-1.4341	0.398187	-3.60158	0.000316287	0.00415698	Nostrin
ENSMUSG00000022217	54.6305	-1.48489	0.412428	-3.60037	0.000317762	0.00417205	Emc9
ENSMUSG00000028261	3761	-0.800301	0.222444	-3.59776	0.000320974	0.00420267	Ndufaf4
ENSMUSG00000029551	1281.62	-0.953052	0.26497	-3.59683	0.000322124	0.00421455	Psmg3
ENSMUSG00000043510	1056.34	-0.755036	0.210002	-3.59539	0.000323911	0.00422838	Hscb
ENSMUSG00000018347	490.99	-0.925975	0.257701	-3.59321	0.000326629	0.00425107	Zkscan6
ENSMUSG00000040723	190.384	-1.0518	0.292923	-3.59071	0.000329781	0.00428247	Rcsd1
ENSMUSG00000042499	1115.92	-0.983155	0.274076	-3.58716	0.000334296	0.00433138	Hoxd11
ENSMUSG00000032398	1124.75	-0.873892	0.244012	-3.58136	0.000341816	0.00441564	Snapc5
ENSMUSG00000002781	56.5662	-1.48878	0.41617	-3.57735	0.000347101	0.00445737	Tmem143
ENSMUSG00000006464	143.53	-1.21054	0.338387	-3.57739	0.000347043	0.00445737	Bbs1
ENSMUSG00000027217	150.337	-1.20756	0.337626	-3.57662	0.000348062	0.00446312	Tspan18
ENSMUSG00000051367	53.8183	-1.5652	0.438138	-3.5724	0.000353726	0.00452237	Six1
ENSMUSG00000026035	1820.19	-0.759352	0.212606	-3.57165	0.000354744	0.00452908	Ppil3
ENSMUSG00000062169	3304.05	-1.05978	0.296722	-3.57163	0.000354772	0.00452908	Cnih4
ENSMUSG00000106951	43.4061	-1.74572	0.489006	-3.56994	0.000357064	0.00455165	5930430L01Rik
ENSMUSG00000033278	593.41	-1.10715	0.310253	-3.56853	0.000358994	0.00456836	Ptprm
ENSMUSG00000007836	2677.94	-0.939628	0.263568	-3.56503	0.00036381	0.0046072	Hnrnpa0
ENSMUSG00000029229	1376.65	-0.888155	0.249191	-3.56416	0.000365026	0.00461923	Chic2
ENSMUSG00000072694	2034.36	-0.77861	0.21883	-3.55806	0.000373611	0.00469705	1500011B03Rik
ENSMUSG00000053181	32.7941	-1.8568	0.522102	-3.55639	0.00037599	0.00471672	A830005F24Rik
ENSMUSG00000045591	50.1182	-1.932	0.54351	-3.55468	0.000378446	0.00473385	Olig3
ENSMUSG00000019971	1179.44	-0.857997	0.241675	-3.55022	0.000384916	0.00480784	Cep290
ENSMUSG00000090626	1030.98	-0.776453	0.218812	-3.54849	0.000387445	0.00483142	Tex9
ENSMUSG00000034177	125.182	-1.07589	0.303533	-3.54455	0.000393279	0.00488933	Rnf43
ENSMUSG00000042524	70.1644	-1.55627	0.439277	-3.54281	0.000395885	0.00491305	Sun2
ENSMUSG00000004562	381.514	-0.850949	0.240627	-3.53639	0.000405639	0.00501974	Arhgef40
ENSMUSG00000032666	348.22	-0.8439	0.238833	-3.53344	0.000410195	0.0050689	1700025G04Rik
ENSMUSG00000028557	254.43	-0.938983	0.265782	-3.53291	0.000411012	0.00507539	Rnf11
ENSMUSG00000056648	33.8724	-1.96481	0.556562	-3.53026	0.000415159	0.00511376	Hoxb8
ENSMUSG00000053030	363.244	-1.24416	0.352489	-3.52963	0.000416135	0.00512044	Spink2
ENSMUSG00000041375	223.804	-0.991862	0.281066	-3.52893	0.000417246	0.00512322	Ccdc9
ENSMUSG00000038271	74.0746	-1.25389	0.355746	-3.52469	0.000423985	0.00517303	Iffo1
ENSMUSG00000033361	98.9381	-1.21067	0.343533	-3.52417	0.000424808	0.00517944	Prrg3
ENSMUSG00000042448	190.221	-0.958566	0.272021	-3.52387	0.000425288	0.00518165	Hoxd1
ENSMUSG00000074922	151.722	-1.04187	0.295734	-3.523	0.000426691	0.00519509	Fam122a
ENSMUSG00000086290	3055.15	-0.926184	0.263391	-3.51639	0.000437463	0.00531135	Snhg12
ENSMUSG00000020380	1487.09	-0.739787	0.210471	-3.51491	0.0004399	0.00533349	Rad50
ENSMUSG00000003346	388.957	-0.940188	0.267578	-3.51369	0.000441922	0.00534307	Abhd17a
ENSMUSG00000032513	100.412	-1.25243	0.356424	-3.51389	0.000441597	0.00534307	Gorasp1
ENSMUSG00000038546	494.444	-0.815084	0.231995	-3.51336	0.000442473	0.00534601	Ranbp9
ENSMUSG00000101655	100.405	-1.25796	0.358126	-3.51263	0.0004437	0.00535711	2310040G24Rik
ENSMUSG00000054641	76.6667	-1.47013	0.418642	-3.51167	0.000445293	0.00537261	Mmrn1
ENSMUSG00000030074	112.754	-1.10992	0.316109	-3.5112	0.000446084	0.00537841	Gxylt2
ENSMUSG00000101174	165.439	-1.19386	0.340138	-3.50991	0.00044826	0.00539872	Hoxd4
ENSMUSG00000062327	6230.34	-0.827444	0.235907	-3.5075	0.000452338	0.00542368	T
ENSMUSG00000047613	2499.79	-0.827052	0.235827	-3.50703	0.000453133	0.00542572	A430005L14Rik
ENSMUSG00000006463	76.1531	-1.23274	0.351493	-3.50714	0.000452949	0.00542572	Zdhhc24
ENSMUSG00000066196	17.5094	-2.2535	0.642602	-3.50684	0.000453465	0.00542595	Spag8
ENSMUSG00000042523	102.175	-1.13126	0.323054	-3.50178	0.000462162	0.00550382	Dnal1
ENSMUSG00000039158	92.8591	-1.28859	0.368173	-3.49997	0.000465316	0.00553343	Akna
ENSMUSG00000023947	26.7885	-1.85663	0.530731	-3.49825	0.000468316	0.0055653	Nfkbie
ENSMUSG00000073002	21.3932	-2.13876	0.611501	-3.49755	0.00046955	0.00557615	Vamp5
ENSMUSG00000097574	11.9134	-3.16373	0.904737	-3.49685	0.000470788	0.00558321	C920006O11Rik
ENSMUSG00000036333	295.217	-0.907595	0.259572	-3.49651	0.000471386	0.00558648	Kidins220
ENSMUSG00000025008	62.0187	-1.52556	0.436461	-3.49529	0.000473549	0.00560829	Tctn3
ENSMUSG00000039046	294.549	-0.954856	0.273222	-3.4948	0.000474415	0.00561417	Usp6nl
ENSMUSG00000040771	818.837	-0.858967	0.24581	-3.49444	0.00047506	0.00561417	Oard1
ENSMUSG00000001751	23.249	-1.97464	0.565174	-3.49386	0.000476097	0.0056193	Naglu
ENSMUSG00000042097	204.083	-0.971324	0.278114	-3.49254	0.000478456	0.00563947	Zfp239
ENSMUSG00000038225	135.741	-1.12047	0.320838	-3.49233	0.00047883	0.00563963	Primpol
ENSMUSG00000029650	17.5804	-2.37043	0.678851	-3.49182	0.000479745	0.00564318	Slc46a3
ENSMUSG00000020717	351.247	-0.968808	0.277639	-3.48946	0.000484006	0.0056856	Pecam1
ENSMUSG00000024604	928.563	-0.87105	0.249648	-3.48912	0.000484614	0.00568888	Rbm22
ENSMUSG00000074211	232.226	-1.06981	0.306636	-3.48885	0.000485103	0.00569079	Sdhaf1
ENSMUSG00000029060	130.77	-1.21635	0.348748	-3.48777	0.00048706	0.00569835	Mib2
ENSMUSG00000049038	487.495	-1.14091	0.327084	-3.48811	0.00048645	0.00569835	Mterf2
ENSMUSG00000051978	389.97	-1.00566	0.28837	-3.48738	0.000487782	0.00570295	Erich1
ENSMUSG00000030725	977.502	-0.864064	0.248195	-3.4814	0.000498803	0.00581223	Lipt2
ENSMUSG00000027652	329.221	-0.940466	0.270207	-3.48053	0.000500415	0.00582433	Ralgapb
ENSMUSG00000054136	108.748	-1.52381	0.437838	-3.4803	0.000500848	0.00582433	Adm2
ENSMUSG00000062234	422.48	-0.980766	0.282025	-3.47759	0.000505941	0.00586391	Gak
ENSMUSG00000046916	98.9696	-1.43896	0.413757	-3.47778	0.000505579	0.00586391	Myct1
ENSMUSG00000031453	276.366	-1.15508	0.332216	-3.4769	0.000507238	0.00587111	Rasa3
ENSMUSG00000026803	256.978	-0.849506	0.244411	-3.47573	0.000509465	0.00588904	Ttf1
ENSMUSG00000039713	44.1228	-1.60057	0.460479	-3.47588	0.000509186	0.00588904	Plekhg5
ENSMUSG00000002103	491.995	-0.786585	0.226326	-3.47546	0.000509985	0.00589112	Acp2
ENSMUSG00000002345	1512.85	-0.782431	0.225212	-3.4742	0.000512378	0.00591483	Borcs8
ENSMUSG00000062312	176.159	-1.14484	0.329687	-3.4725	0.000515645	0.00594464	Erbb2
ENSMUSG00000018501	3922.82	-0.751899	0.216611	-3.47119	0.000518149	0.00596954	Ncor1
ENSMUSG00000021466	834.066	-0.850527	0.245119	-3.46985	0.000520746	0.00599152	Ptch1
ENSMUSG00000043140	215.091	-1.24622	0.359182	-3.46961	0.000521212	0.00599291	Tmem186
ENSMUSG00000008398	400.378	-0.980228	0.282708	-3.46728	0.000525755	0.00603316	Elk3
ENSMUSG00000074212	172.339	-0.963924	0.278156	-3.46541	0.000529417	0.00605916	Dnajb14
ENSMUSG00000027312	281.941	-0.939243	0.271053	-3.46516	0.000529916	0.00606087	Atrn
ENSMUSG00000016409	2068.52	-0.735757	0.212644	-3.46005	0.00054008	0.00614876	Nkap
ENSMUSG00000040105	22.4064	-1.99142	0.575533	-3.46014	0.000539894	0.00614876	Plpp6
ENSMUSG00000056492	127.478	-1.61348	0.46672	-3.45707	0.000546081	0.00621302	Adgrf5
ENSMUSG00000001138	213.308	-1.00232	0.290045	-3.45575	0.000548768	0.00623542	Cnnm3
ENSMUSG00000042298	290.536	-1.01004	0.292404	-3.45424	0.000551836	0.00624982	Ttc19
ENSMUSG00000030699	225.119	-1.2267	0.355514	-3.4505	0.000559547	0.00632598	Tbx6
ENSMUSG00000019791	321.951	-0.933859	0.270793	-3.44861	0.000563488	0.00636103	Hint3
ENSMUSG00000038146	121.162	-1.22268	0.355063	-3.44356	0.000574106	0.0064599	Notch3
ENSMUSG00000025354	265.569	-0.844607	0.245327	-3.44278	0.000575765	0.00647019	Dnajc14
ENSMUSG00000034557	357.235	-0.884224	0.25705	-3.43989	0.000581955	0.00653552	Zfyve9
ENSMUSG00000027487	247.113	-1.10921	0.322583	-3.43854	0.000584867	0.00655126	Cdk5rap1
ENSMUSG00000046707	855.861	-0.794258	0.230964	-3.43888	0.000584119	0.00655126	Csnk2a2
ENSMUSG00000112880	67.0365	-1.37231	0.399078	-3.43871	0.000584497	0.00655126	Gm20337
ENSMUSG00000025466	332.461	-0.828674	0.241115	-3.43684	0.000588543	0.00657547	Fuom
ENSMUSG00000038437	481.732	-0.853723	0.24847	-3.43592	0.000590556	0.00659372	Mllt6
ENSMUSG00000017550	719.352	-0.975838	0.28419	-3.43375	0.000595302	0.00663391	Atad5
ENSMUSG00000027303	532.016	-0.821008	0.239132	-3.43328	0.000596328	0.0066343	Ptpra
ENSMUSG00000067365	4036.97	-0.780105	0.227258	-3.43269	0.000597624	0.00664274	Tmem128
ENSMUSG00000037795	879.465	-0.830546	0.242191	-3.42931	0.000605129	0.00671755	N4bp2
ENSMUSG00000049562	10.1707	-3.18049	0.927512	-3.42906	0.000605685	0.00671943	Ap5b1
ENSMUSG00000023089	6869.83	-0.853646	0.249042	-3.42771	0.000608687	0.00674411	Ndufa5
ENSMUSG00000026357	29.974	-1.80102	0.525753	-3.4256	0.000613449	0.00678821	Rgs18
ENSMUSG00000062762	413.304	-0.839892	0.245212	-3.42517	0.000614419	0.00679348	Ei24
ENSMUSG00000085984	25.6209	-1.91998	0.560722	-3.42413	0.000616781	0.00681206	1700001G11Rik
ENSMUSG00000049285	34.0441	-1.63871	0.478679	-3.4234	0.000618433	0.00682162	Mblac1
ENSMUSG00000059316	106.786	-1.20182	0.351336	-3.42071	0.000624573	0.00687624	Slc27a4
ENSMUSG00000056014	87.084	-1.15174	0.336915	-3.41849	0.000629697	0.00691949	A430033K04Rik
ENSMUSG00000021451	179.914	-1.13207	0.331427	-3.41573	0.000636105	0.00696346	Sema4d
ENSMUSG00000030036	363.069	-0.973371	0.285625	-3.40786	0.000654741	0.0071315	Mogs
ENSMUSG00000021764	6353.66	-0.829109	0.243291	-3.40789	0.000654671	0.0071315	Ndufs4
ENSMUSG00000022122	83.5913	-1.24954	0.366869	-3.40596	0.000659321	0.00717239	Ednrb
ENSMUSG00000029598	248.821	-1.00834	0.296221	-3.40401	0.000664039	0.00721467	Plbd2
ENSMUSG00000078716	38.1109	-1.55488	0.457103	-3.4016	0.000669921	0.00726494	Tmem8b
ENSMUSG00000041000	70.7546	-1.22751	0.361246	-3.39799	0.000678824	0.00733857	Trim62
ENSMUSG00000036432	282.277	-0.959554	0.282514	-3.39648	0.000682594	0.00737474	Siah2
ENSMUSG00000014301	1504.79	-0.758652	0.223388	-3.39612	0.000683481	0.00737818	Pam16
ENSMUSG00000019944	39.2569	-1.66643	0.491109	-3.39319	0.000690825	0.00743129	Rhobtb1
ENSMUSG00000017713	20.1465	-2.29185	0.675687	-3.39188	0.000694137	0.00744846	Tha1
ENSMUSG00000060301	477.359	-0.893977	0.263628	-3.39106	0.000696241	0.00746181	2610008E11Rik
ENSMUSG00000063200	3149.54	-0.71303	0.210362	-3.38954	0.000700101	0.00749856	Nol7
ENSMUSG00000035566	59.767	-1.55127	0.458028	-3.38684	0.000707035	0.00756815	Pcdh17
ENSMUSG00000023791	3209.36	-0.850795	0.251274	-3.38592	0.000709398	0.00758877	Pigx
ENSMUSG00000045039	138.369	-1.12189	0.331386	-3.38544	0.000710648	0.00759746	Megf8
ENSMUSG00000062580	8532.7	-0.680615	0.201211	-3.38259	0.00071807	0.00766265	Timm17a
ENSMUSG00000078517	598.524	-0.798706	0.2363	-3.38005	0.000724727	0.00771489	Emc1
ENSMUSG00000002897	145.418	-1.12839	0.334185	-3.37655	0.000734005	0.00778994	Il17ra
ENSMUSG00000052105	175.817	-0.978988	0.289997	-3.37585	0.000735879	0.00780472	Mtcl1
ENSMUSG00000051037	16.4548	-2.55881	0.758105	-3.37528	0.000737418	0.00781503	Zfp455
ENSMUSG00000045996	1327.78	-0.870406	0.257886	-3.37515	0.000737751	0.00781503	Polr2k
ENSMUSG00000056536	327.718	-0.884674	0.262292	-3.37286	0.000743917	0.0078587	Pign
ENSMUSG00000030403	469.301	-0.849237	0.251772	-3.37304	0.000743429	0.0078587	Vasp
ENSMUSG00000025893	184.518	-1.05507	0.312803	-3.37297	0.000743623	0.0078587	Kbtbd3
ENSMUSG00000069273	209.855	-1.03378	0.306921	-3.36823	0.000756517	0.00797489	H3c6
ENSMUSG00000052726	23.1299	-1.98577	0.589778	-3.36698	0.000759949	0.00800135	Kcnt2
ENSMUSG00000029304	24.8248	-2.07657	0.616932	-3.36596	0.00076278	0.00802629	Spp1
ENSMUSG00000073468	457.722	-0.947332	0.281579	-3.36435	0.000767228	0.00805845	Sft2d1
ENSMUSG00000085227	55.9319	-1.27681	0.379599	-3.36359	0.00076937	0.00807606	6330418K02Rik
ENSMUSG00000024993	398.398	-1.03013	0.306648	-3.35931	0.000781377	0.00817738	Dennd10
ENSMUSG00000037363	101.229	-1.02455	0.305041	-3.35874	0.000782997	0.0081894	Letm2
ENSMUSG00000071661	25.0714	-1.85861	0.553601	-3.35731	0.000787045	0.00821845	Zbtb3
ENSMUSG00000037736	2206.71	-0.768723	0.229052	-3.3561	0.000790501	0.00823316	Limch1
ENSMUSG00000081683	86.4971	-1.30775	0.389989	-3.3533	0.00079854	0.00829698	Fzd10
ENSMUSG00000054237	878.825	-0.783086	0.23351	-3.35355	0.000797821	0.00829698	Fra10ac1
ENSMUSG00000045273	2390.1	-0.72169	0.215232	-3.35308	0.000799189	0.00829875	Cenph
ENSMUSG00000006010	731.598	-0.80028	0.238721	-3.35236	0.000801249	0.00831518	Odr4
ENSMUSG00000020812	1008.47	-0.795665	0.237404	-3.35153	0.000803667	0.0083303	Snhg16
ENSMUSG00000022151	1008.1	-0.948141	0.282898	-3.35153	0.000803656	0.0083303	Ttc33
ENSMUSG00000062470	44.5384	-1.43583	0.428445	-3.35126	0.000804451	0.00833346	Fbxl12os
ENSMUSG00000071855	121.124	-1.0553	0.31512	-3.34889	0.000811363	0.00837508	Ccdc112
ENSMUSG00000075700	790.164	-0.828916	0.248003	-3.34236	0.000830695	0.0085523	Selenot
ENSMUSG00000029469	1545.88	-0.77873	0.232999	-3.3422	0.000831159	0.0085523	Ift81
ENSMUSG00000006526	260.683	-0.886617	0.265249	-3.34258	0.000830033	0.0085523	Stimate
ENSMUSG00000047098	73.9106	-1.17011	0.350308	-3.34022	0.000837117	0.00860002	Rnf31
ENSMUSG00000020956	658.486	-1.23847	0.370872	-3.33934	0.000839766	0.00860898	Dtd2
ENSMUSG00000002602	92.6215	-1.09531	0.328102	-3.33833	0.000842828	0.00862297	Axl
ENSMUSG00000048138	85.4433	-1.48845	0.445998	-3.33735	0.000845818	0.00864337	Dmrt2
ENSMUSG00000033149	476.26	-0.779909	0.233834	-3.3353	0.000852063	0.00869184	Phldb2
ENSMUSG00000030330	128.294	-1.16864	0.3506	-3.33327	0.000858327	0.00873521	Ing4
ENSMUSG00000021843	3358.13	-0.841064	0.252404	-3.33221	0.000861589	0.00876328	Ktn1
ENSMUSG00000054770	93.684	-1.13308	0.340077	-3.33182	0.000862806	0.00876538	Kctd18
ENSMUSG00000037761	94.3738	-1.07327	0.322119	-3.33191	0.000862515	0.00876538	Actr5
ENSMUSG00000048486	93.6464	-1.11649	0.335173	-3.33109	0.000865055	0.00878309	Fitm2
ENSMUSG00000014856	2888.75	-0.909864	0.273173	-3.33072	0.000866211	0.00878969	Tmem208
ENSMUSG00000041840	1797.02	-0.716354	0.215189	-3.32895	0.000871726	0.00884048	Haus1
ENSMUSG00000057110	1301.97	-0.738704	0.222077	-3.32635	0.000879923	0.00889762	Cntrl
ENSMUSG00000032826	365.451	-0.824851	0.248027	-3.32565	0.000882119	0.00891463	Ank2
ENSMUSG00000023951	140.799	-1.13589	0.34159	-3.32529	0.000883253	0.00892091	Vegfa
ENSMUSG00000044080	584.337	-0.923462	0.277902	-3.32298	0.000890609	0.00898311	S100a1
ENSMUSG00000048439	265.588	-1.22165	0.367651	-3.32287	0.000890964	0.00898311	Nupl2
ENSMUSG00000044496	265.965	-0.91147	0.274329	-3.32254	0.000892006	0.0089884	2510039O18Rik
ENSMUSG00000074513	150.065	-0.970393	0.292127	-3.32182	0.000894326	0.00900247	Arfip1
ENSMUSG00000027900	1100.99	-0.81017	0.243938	-3.32121	0.000896281	0.00901578	Dram2
ENSMUSG00000021951	2789.88	-0.711899	0.214394	-3.32052	0.000898507	0.00902771	Eef1akmt1
ENSMUSG00000020930	33.8846	-1.57382	0.474191	-3.31896	0.000903522	0.00905713	Ccdc103
ENSMUSG00000036948	43.0079	-1.65033	0.497387	-3.31801	0.000906613	0.00908287	Map11
ENSMUSG00000008822	795.77	-0.80781	0.243595	-3.3162	0.000912498	0.00913656	Acyp1
ENSMUSG00000032394	136.159	-1.13814	0.343245	-3.31583	0.000913713	0.00914345	Igdcc3
ENSMUSG00000002486	383.226	-0.764178	0.230525	-3.31494	0.000916621	0.00915773	Tchp
ENSMUSG00000099881	331.397	-0.949632	0.286473	-3.31491	0.000916722	0.00915773	2810013P06Rik
ENSMUSG00000097412	153.31	-1.01261	0.305526	-3.31431	0.000918688	0.00917209	1810014B01Rik
ENSMUSG00000020441	403.736	-1.02061	0.308062	-3.31301	0.00092297	0.00920425	2310033P09Rik
ENSMUSG00000056427	280.134	-1.00142	0.302315	-3.31251	0.000924644	0.00921566	Slit3
ENSMUSG00000034290	849.046	-0.766783	0.231517	-3.31199	0.000926352	0.00922738	Nek9
ENSMUSG00000022195	432.881	-0.766102	0.231541	-3.30871	0.000937269	0.00932542	6030458C11Rik
ENSMUSG00000027001	373.919	-0.883185	0.267	-3.3078	0.000940304	0.00934491	Dusp19
ENSMUSG00000098318	319.221	-0.90815	0.274569	-3.30755	0.000941155	0.00934802	Lockd
ENSMUSG00000042202	231.936	-0.843856	0.255183	-3.30687	0.000943438	0.00936163	Slc35e2
ENSMUSG00000098090	751.471	-0.753296	0.227812	-3.30666	0.000944143	0.00936163	2700099C18Rik
ENSMUSG00000014633	2551.57	-0.712327	0.215834	-3.30035	0.000965653	0.00953136	Cmc2
ENSMUSG00000007888	45.4762	-1.38961	0.421113	-3.29986	0.000967336	0.00954255	Crlf1
ENSMUSG00000091994	46.3502	-1.48275	0.449559	-3.29824	0.000972932	0.00958686	E130317F20Rik
ENSMUSG00000046169	144.236	-1.02387	0.310592	-3.29652	0.000978923	0.00963496	Adamts6
ENSMUSG00000033209	390.195	-0.951634	0.288715	-3.29611	0.000980353	0.00964357	Ttc28
ENSMUSG00000049532	299.968	-0.822423	0.249876	-3.29133	0.000997163	0.00979228	Sall2
ENSMUSG00000034614	155.134	-0.940155	0.285936	-3.28799	0.00100904	0.00988662	Pik3ip1
ENSMUSG00000109118	77.1044	-1.23941	0.377039	-3.28722	0.00101183	0.00990683	Gm32031

## Sheet: DEGs_FBP_UP _p0.01
row	baseMean	log2FoldChange	lfcSE	stat	pvalue	padj	symbol
ENSMUSG00000111548	102.928	6.00983	0.578518	10.3883	2.80233e-25	9.7308e-22	Gm8162
ENSMUSG00000008384	671.774	2.29791	0.247783	9.27388	1.79503e-20	3.15727e-17	Sertad1
ENSMUSG00000003541	213.154	2.7849	0.300222	9.27614	1.75726e-20	3.15727e-17	Ier3
ENSMUSG00000105461	66.7982	4.43784	0.496683	8.93497	4.07302e-19	4.41974e-16	Gm4742
ENSMUSG00000031508	4246.53	2.14904	0.245702	8.74654	2.19999e-18	2.24684e-15	Ankrd10
ENSMUSG00000031329	96.2664	3.20636	0.370412	8.65619	4.87776e-18	4.70487e-15	Tsx
ENSMUSG00000093930	3886.05	2.88082	0.360185	7.99816	1.26288e-15	7.07294e-13	Hmgcs1
ENSMUSG00000030494	625.284	2.01552	0.257032	7.84151	4.4515e-15	2.34203e-12	Rhpn2
ENSMUSG00000004665	3635.58	1.82876	0.23487	7.78626	6.90213e-15	3.42385e-12	Cnn2
ENSMUSG00000022048	5854.79	1.80291	0.233342	7.72649	1.10551e-14	5.18751e-12	Dpysl2
ENSMUSG00000033949	453.515	2.68811	0.352672	7.62213	2.49524e-14	1.08306e-11	Trim36
ENSMUSG00000015656	41346.3	2.29886	0.304126	7.55892	4.0643e-14	1.6801e-11	Hspa8
ENSMUSG00000005103	3849.6	2.00218	0.265775	7.53337	4.94455e-14	1.99645e-11	Wdr1
ENSMUSG00000005483	1589.83	1.6958	0.228485	7.42193	1.15428e-13	4.45349e-11	Dnajb1
ENSMUSG00000100801	13624.9	2.70096	0.367749	7.34456	2.06443e-13	7.46721e-11	Gm15459
ENSMUSG00000023092	1695.63	1.89961	0.261793	7.25616	3.98245e-13	1.32968e-10	Fhl1
ENSMUSG00000026475	64.0656	3.15446	0.435439	7.24431	4.34648e-13	1.42384e-10	Rgs16
ENSMUSG00000087370	341.442	1.81495	0.261406	6.94305	3.83721e-12	1.04096e-09	Tmem170b
ENSMUSG00000021754	905.021	1.93467	0.279569	6.92018	4.51056e-12	1.18655e-09	Map3k1
ENSMUSG00000021250	69.6644	2.90628	0.420838	6.90593	4.98761e-12	1.29246e-09	Fos
ENSMUSG00000021025	2946.5	1.76005	0.257637	6.83152	8.40171e-12	2.05451e-09	Nfkbia
ENSMUSG00000027368	261.847	1.95618	0.287608	6.80154	1.03508e-11	2.42852e-09	Dusp2
ENSMUSG00000063550	1751.31	1.54293	0.227067	6.79507	1.08263e-11	2.50621e-09	Nup98
ENSMUSG00000022860	214.188	2.14096	0.319616	6.69855	2.10501e-11	4.5684e-09	Chodl
ENSMUSG00000019487	533.163	1.75366	0.261882	6.69638	2.13648e-11	4.57945e-09	Trip10
ENSMUSG00000058672	451.004	2.15799	0.324532	6.64953	2.94029e-11	6.00581e-09	Tubb2a
ENSMUSG00000045294	391.949	2.4887	0.377042	6.6006	4.095e-11	7.89972e-09	Insig1
ENSMUSG00000020363	265.637	1.91205	0.289934	6.59477	4.25924e-11	8.12626e-09	Gfpt2
ENSMUSG00000038112	1214.45	1.79608	0.272579	6.58919	4.42219e-11	8.34544e-09	AW551984
ENSMUSG00000037266	5123.66	1.65568	0.255612	6.47731	9.33711e-11	1.63748e-08	Rsrp1
ENSMUSG00000038235	901.212	1.62273	0.251775	6.44514	1.1549e-10	1.91391e-08	F11r
ENSMUSG00000015837	2883.55	1.75932	0.272939	6.44582	1.14978e-10	1.91391e-08	Sqstm1
ENSMUSG00000006498	2185.96	1.96563	0.308345	6.37478	1.83228e-10	2.94557e-08	Ptbp1
ENSMUSG00000029580	39064.8	1.43911	0.228351	6.3022	2.93458e-10	4.50887e-08	Actb
ENSMUSG00000040128	667.86	1.52279	0.242132	6.28906	3.19386e-10	4.8642e-08	Pnrc1
ENSMUSG00000032294	18662.8	1.69459	0.269949	6.27745	3.4417e-10	5.1537e-08	Pkm
ENSMUSG00000001270	1063.97	2.14293	0.343117	6.24547	4.22529e-10	6.21691e-08	Ckb
ENSMUSG00000017677	3264.62	1.90898	0.305743	6.24373	4.27263e-10	6.23374e-08	Wsb1
ENSMUSG00000040250	2159.39	1.51143	0.242221	6.23988	4.37913e-10	6.33587e-08	Ints13
ENSMUSG00000031278	589.709	1.55415	0.249415	6.2312	4.62889e-10	6.64189e-08	Acsl4
ENSMUSG00000030752	258.859	1.73036	0.281534	6.14617	7.93783e-10	1.09378e-07	Kdm8
ENSMUSG00000028967	546.604	1.36196	0.222806	6.11277	9.79152e-10	1.30196e-07	Errfi1
ENSMUSG00000030555	1958.2	1.54109	0.251995	6.11553	9.62361e-10	1.30196e-07	Ttc23
ENSMUSG00000042650	1914.19	1.52529	0.249672	6.1092	1.00135e-09	1.31707e-07	Alkbh5
ENSMUSG00000050503	116.827	2.7544	0.458108	6.01256	1.82612e-09	2.33126e-07	Fbxl22
ENSMUSG00000007564	4081.39	1.7536	0.292903	5.98694	2.13822e-09	2.67078e-07	Ppp2r1a
ENSMUSG00000093798	30.6195	3.59158	0.600193	5.98404	2.17669e-09	2.69941e-07	Gm8355
ENSMUSG00000044533	37128.9	1.39069	0.233141	5.96504	2.44573e-09	2.99034e-07	Rps2
ENSMUSG00000022812	4364.16	1.48316	0.2535	5.85071	4.89482e-09	5.41621e-07	Gsk3b
ENSMUSG00000025993	238.181	2.11346	0.361714	5.8429	5.13011e-09	5.54032e-07	Slc40a1
ENSMUSG00000022464	758.253	1.68352	0.290793	5.78939	7.06409e-09	7.38835e-07	Slc38a4
ENSMUSG00000022139	710.159	1.30365	0.225662	5.77701	7.60394e-09	7.90537e-07	Mbnl2
ENSMUSG00000034457	91.729	2.29554	0.397936	5.7686	7.99308e-09	8.17981e-07	Eda2r
ENSMUSG00000030161	954.583	1.70259	0.295165	5.76826	8.00926e-09	8.17981e-07	Gabarapl1
ENSMUSG00000043807	54.7364	2.64419	0.459154	5.75882	8.47032e-09	8.55009e-07	Ly6g5b
ENSMUSG00000070385	32.7863	3.75768	0.654281	5.74321	9.28964e-09	9.32293e-07	Ampd1
ENSMUSG00000029552	1112.71	1.41683	0.246834	5.73998	9.46875e-09	9.39408e-07	Tes
ENSMUSG00000034825	60.2298	3.26507	0.570123	5.72695	1.02251e-08	9.97346e-07	Nrip3
ENSMUSG00000035150	762.517	1.31738	0.230655	5.71147	1.12006e-08	1.08639e-06	Eif2s3x
ENSMUSG00000043192	151.988	2.10486	0.368616	5.71019	1.12853e-08	1.08853e-06	Gpi-ps
ENSMUSG00000023043	3217.09	1.68617	0.296812	5.68095	1.33947e-08	1.25708e-06	Krt18
ENSMUSG00000049907	1002.04	1.43792	0.254169	5.65737	1.53714e-08	1.42716e-06	Rasl11b
ENSMUSG00000001525	87806.4	1.70102	0.301045	5.65038	1.6009e-08	1.46893e-06	Tubb5
ENSMUSG00000021957	3191.86	1.39507	0.247338	5.64036	1.69692e-08	1.53447e-06	Tkt
ENSMUSG00000026950	180	2.0046	0.356284	5.62641	1.84003e-08	1.64673e-06	Neb
ENSMUSG00000022351	966.405	1.79937	0.320589	5.6127	1.9919e-08	1.76446e-06	Sqle
ENSMUSG00000027104	2725.48	1.44654	0.258627	5.59315	2.22981e-08	1.9357e-06	Atf2
ENSMUSG00000020649	14895.5	1.84635	0.330619	5.58453	2.34329e-08	2.01407e-06	Rrm2
ENSMUSG00000025316	952.322	1.29373	0.233809	5.53329	3.14274e-08	2.58598e-06	Banp
ENSMUSG00000025151	9461.37	1.26178	0.229543	5.49691	3.86493e-08	3.12107e-06	Maged1
ENSMUSG00000056962	1599.98	1.38665	0.252988	5.48109	4.22703e-08	3.32705e-06	Jmjd6
ENSMUSG00000006398	6513.77	1.59789	0.292201	5.46845	4.53988e-08	3.55051e-06	Cdc20
ENSMUSG00000038069	885.866	1.67528	0.306442	5.46687	4.58053e-08	3.56624e-06	Cdkn2aip
ENSMUSG00000021048	1415.42	1.29052	0.236498	5.4568	4.848e-08	3.75764e-06	Mthfd1
ENSMUSG00000025372	156.098	1.57309	0.288784	5.4473	5.11405e-08	3.91146e-06	Baiap2
ENSMUSG00000044244	82.9672	2.19783	0.403541	5.44637	5.14087e-08	3.91473e-06	Il20rb
ENSMUSG00000045136	276.973	1.88673	0.347975	5.42201	5.89314e-08	4.41021e-06	Tubb2b
ENSMUSG00000028128	368.979	1.70715	0.316449	5.39471	6.86343e-08	5.04928e-06	F3
ENSMUSG00000032405	1767.56	1.45672	0.271196	5.37146	7.81006e-08	5.69741e-06	Pias1
ENSMUSG00000010097	4967.92	1.30834	0.243646	5.36986	7.87998e-08	5.72436e-06	Nxf1
ENSMUSG00000067276	142.387	1.71652	0.320274	5.35952	8.34431e-08	6.01136e-06	Capn6
ENSMUSG00000067818	1899.95	1.57417	0.294226	5.3502	8.78553e-08	6.30307e-06	Myl9
ENSMUSG00000036442	1584.67	1.19542	0.224466	5.32559	1.00627e-07	7.07319e-06	Thap11
ENSMUSG00000062825	21857.6	1.85368	0.348597	5.31755	1.05174e-07	7.30411e-06	Actg1
ENSMUSG00000032262	354.063	1.41512	0.26633	5.3134	1.07596e-07	7.44256e-06	Elovl4
ENSMUSG00000015839	1522.92	1.40037	0.264341	5.2976	1.17336e-07	8.01416e-06	Nfe2l2
ENSMUSG00000018167	746.115	1.19673	0.225925	5.29702	1.17706e-07	8.01416e-06	Stard3
ENSMUSG00000036093	1298.13	1.60977	0.304152	5.29265	1.20556e-07	8.17612e-06	Arl5a
ENSMUSG00000059552	2937.32	1.41409	0.267978	5.27687	1.3141e-07	8.80902e-06	Trp53
ENSMUSG00000006517	686.21	1.65563	0.315233	5.25208	1.50393e-07	9.77947e-06	Mvd
ENSMUSG00000036427	5457.61	1.67588	0.319263	5.24923	1.52734e-07	9.89466e-06	Gpi1
ENSMUSG00000056749	540.592	1.35192	0.257879	5.24247	1.58444e-07	1.01549e-05	Nfil3
ENSMUSG00000028060	1648.21	1.1091	0.212465	5.22017	1.78758e-07	1.12449e-05	Khdc4
ENSMUSG00000025432	32.6678	3.35543	0.644374	5.20727	1.91635e-07	1.18405e-05	Avil
ENSMUSG00000023015	3253.91	1.38397	0.265944	5.20398	1.95061e-07	1.20094e-05	Racgap1
ENSMUSG00000027510	126.809	1.66739	0.320541	5.2018	1.97372e-07	1.20255e-05	Rbm38
ENSMUSG00000026687	525.14	1.57027	0.301912	5.20108	1.98135e-07	1.20281e-05	Aldh9a1
ENSMUSG00000100033	33.0471	2.80725	0.540316	5.19558	2.04087e-07	1.2306e-05	Gm8337
ENSMUSG00000025130	10643.8	1.09246	0.210269	5.19554	2.04131e-07	1.2306e-05	P4hb
ENSMUSG00000021701	1210.35	1.2125	0.233612	5.19021	2.10055e-07	1.25325e-05	Plk2
ENSMUSG00000003269	1987.66	1.51147	0.291846	5.17898	2.23098e-07	1.31303e-05	Cyth2
ENSMUSG00000000441	1418.58	1.88401	0.364	5.17587	2.26856e-07	1.33063e-05	Raf1
ENSMUSG00000028214	80.4101	2.23697	0.432789	5.16873	2.35687e-07	1.37778e-05	Gem
ENSMUSG00000042515	1232.07	1.28239	0.248398	5.16263	2.43504e-07	1.41395e-05	Pwwp3b
ENSMUSG00000020184	1549.44	1.34871	0.261348	5.16058	2.46184e-07	1.42475e-05	Mdm2
ENSMUSG00000001349	33.9039	3.14946	0.610376	5.15987	2.47119e-07	1.42541e-05	Cnn1
ENSMUSG00000039041	1634.02	1.24895	0.242544	5.14939	2.61328e-07	1.50238e-05	Adrm1
ENSMUSG00000005968	201.917	1.53085	0.297418	5.14715	2.64478e-07	1.51138e-05	Tuft1
ENSMUSG00000063229	91117.4	1.80223	0.350196	5.14636	2.65596e-07	1.5119e-05	Ldha
ENSMUSG00000016526	195.144	1.57739	0.30745	5.13055	2.88901e-07	1.63384e-05	Dyrk3
ENSMUSG00000006299	3504.78	1.34836	0.263026	5.12635	2.9542e-07	1.65889e-05	Aamp
ENSMUSG00000043284	3300	1.37467	0.268382	5.12206	3.02217e-07	1.68455e-05	Tmem11
ENSMUSG00000032127	800.784	1.30737	0.255993	5.10706	3.27207e-07	1.80923e-05	Vps11
ENSMUSG00000024742	118.215	1.83576	0.360866	5.08709	3.63603e-07	1.99145e-05	Fen1
ENSMUSG00000027597	2132.58	1.85652	0.365412	5.08062	3.76214e-07	2.03886e-05	Ahcy
ENSMUSG00000079304	29.0792	3.24872	0.639454	5.08046	3.7653e-07	2.03886e-05	Tex52
ENSMUSG00000000056	506.809	2.05671	0.404891	5.07965	3.78133e-07	2.03886e-05	Narf
ENSMUSG00000024563	2001.7	1.55829	0.306718	5.08054	3.7637e-07	2.03886e-05	Smad2
ENSMUSG00000059796	8965.95	1.49175	0.293905	5.07562	3.86239e-07	2.07613e-05	Eif4a1
ENSMUSG00000021273	1469.98	1.57905	0.311669	5.06644	4.05319e-07	2.15459e-05	Fdft1
ENSMUSG00000052423	205.144	1.62442	0.321311	5.05559	4.29071e-07	2.26429e-05	B4galt3
ENSMUSG00000056234	436.242	1.5441	0.30581	5.0492	4.43662e-07	2.32014e-05	Ncoa4
ENSMUSG00000047648	947.095	1.45902	0.289469	5.04034	4.64704e-07	2.40841e-05	Fbxo30
ENSMUSG00000030082	1270.01	1.05071	0.208649	5.03578	4.75906e-07	2.45913e-05	Sec61a1
ENSMUSG00000024966	4901.35	1.49767	0.297616	5.03223	4.84797e-07	2.49764e-05	Stip1
ENSMUSG00000051379	1511.06	1.3152	0.261544	5.0286	4.94077e-07	2.53792e-05	Flrt3
ENSMUSG00000036699	114.494	1.99479	0.397177	5.02243	5.10212e-07	2.60538e-05	Zcchc12
ENSMUSG00000107951	67.3282	2.18384	0.43608	5.00788	5.50337e-07	2.7857e-05	Gm6210
ENSMUSG00000028703	364.435	1.47456	0.294533	5.00644	5.54449e-07	2.79836e-05	Lrrc41
ENSMUSG00000069135	2537.99	1.33338	0.266564	5.00211	5.67071e-07	2.85176e-05	Cep43
ENSMUSG00000047501	140.41	1.91023	0.382705	4.99141	5.99404e-07	2.96491e-05	Cldn4
ENSMUSG00000037536	369.266	1.222	0.245496	4.97768	6.43525e-07	3.16512e-05	Fbxo34
ENSMUSG00000005683	7026.5	1.24388	0.251362	4.94856	7.47638e-07	3.60569e-05	Cs
ENSMUSG00000020572	1588.08	1.29152	0.261423	4.94034	7.79846e-07	3.7506e-05	Nampt
ENSMUSG00000050310	1353.16	1.33024	0.269423	4.93737	7.9184e-07	3.79777e-05	Rictor
ENSMUSG00000041957	218.396	1.41308	0.286958	4.92434	8.46444e-07	4.00435e-05	Pkp2
ENSMUSG00000053461	26.6543	3.29684	0.670583	4.91637	8.81617e-07	4.11897e-05	Hhipl2
ENSMUSG00000068614	288.191	1.79293	0.3647	4.91617	8.82535e-07	4.11897e-05	Actc1
ENSMUSG00000027263	402.265	1.53843	0.31318	4.91226	9.00303e-07	4.18549e-05	Tubgcp4
ENSMUSG00000114733	434.076	1.69754	0.348285	4.874	1.0936e-06	4.95745e-05	Gm4815
ENSMUSG00000025950	4317.01	1.62649	0.334042	4.8691	1.12107e-06	5.06876e-05	Idh1
ENSMUSG00000016382	2782.43	1.74657	0.362573	4.81717	1.45609e-06	6.35191e-05	Pls3
ENSMUSG00000025437	602.97	1.19921	0.249311	4.8101	1.50858e-06	6.53164e-05	Usp33
ENSMUSG00000028896	824.026	1.27691	0.265743	4.80506	1.54707e-06	6.68166e-05	Rcc1
ENSMUSG00000037204	2430.62	1.31333	0.273651	4.79928	1.59233e-06	6.8333e-05	Atg101
ENSMUSG00000115662	21.4031	3.02913	0.632608	4.78833	1.68178e-06	7.17421e-05	Gm7232
ENSMUSG00000002996	3133.57	1.51836	0.317189	4.78694	1.69343e-06	7.1886e-05	Hbp1
ENSMUSG00000039748	2084.09	1.19865	0.250486	4.78529	1.70743e-06	7.23033e-05	Exo1
ENSMUSG00000028745	6016.65	1.32915	0.277864	4.78347	1.72293e-06	7.27824e-05	Capzb
ENSMUSG00000059486	1024.5	1.17945	0.246768	4.77958	1.75662e-06	7.36676e-05	Kbtbd2
ENSMUSG00000039680	1992.23	1.20082	0.251238	4.7796	1.75644e-06	7.36676e-05	Mrps6
ENSMUSG00000032656	175.769	1.94479	0.406991	4.77846	1.76647e-06	7.37245e-05	Marchf3
ENSMUSG00000035473	249.732	1.44835	0.303534	4.77161	1.8276e-06	7.60929e-05	Galm
ENSMUSG00000025487	1657.59	1.25614	0.263283	4.77107	1.83253e-06	7.61157e-05	Psmd13
ENSMUSG00000030695	20581.1	1.39652	0.293022	4.76594	1.87977e-06	7.73378e-05	Aldoa
ENSMUSG00000021948	509.323	1.35616	0.284544	4.7661	1.8783e-06	7.73378e-05	Prkcd
ENSMUSG00000071379	643.267	1.53246	0.321629	4.76468	1.89158e-06	7.76398e-05	Hpcal1
ENSMUSG00000039611	472.203	1.35857	0.285432	4.75971	1.93876e-06	7.93886e-05	Pgap4
ENSMUSG00000049001	73.1528	2.23026	0.468677	4.75862	1.94919e-06	7.96277e-05	Ndnf
ENSMUSG00000036478	2389.81	1.18543	0.249652	4.74835	2.05085e-06	8.28065e-05	Btg1
ENSMUSG00000022003	242.752	1.2235	0.257771	4.74648	2.06989e-06	8.33813e-05	Slc25a30
ENSMUSG00000050052	170.139	1.45806	0.307253	4.74548	2.08014e-06	8.36003e-05	Tdrp
ENSMUSG00000047832	5018.41	1.38914	0.293248	4.73708	2.1682e-06	8.634e-05	Cdca4
ENSMUSG00000000078	1702.12	1.34969	0.285417	4.72885	2.25799e-06	8.95052e-05	Klf6
ENSMUSG00000012443	867.603	1.2247	0.259869	4.71275	2.44398e-06	9.55686e-05	Kif11
ENSMUSG00000037957	589.225	1.55651	0.330346	4.71174	2.45614e-06	9.5828e-05	Wdr20
ENSMUSG00000051855	9903.65	1.36626	0.290217	4.70773	2.50488e-06	9.75106e-05	Mest
ENSMUSG00000033777	21.4773	3.33741	0.709435	4.70432	2.54717e-06	9.89351e-05	Tlr13
ENSMUSG00000028032	2218.85	1.44834	0.308145	4.70019	2.5992e-06	0.000100731	Papss1
ENSMUSG00000022285	9876.86	1.23175	0.262614	4.69035	2.72737e-06	0.000104995	Ywhaz
ENSMUSG00000023004	14117	1.17954	0.251724	4.68583	2.78825e-06	0.000107101	Tuba1b
ENSMUSG00000032336	2256.38	1.42437	0.304747	4.67395	2.95464e-06	0.000112005	Nptn
ENSMUSG00000058258	317.136	1.82513	0.390563	4.67308	2.96716e-06	0.000112235	Idi1
ENSMUSG00000003033	1680.4	1.3383	0.287119	4.66115	3.14443e-06	0.000117913	Ap1m1
ENSMUSG00000051220	970.127	1.34602	0.289083	4.65618	3.22125e-06	0.000120016	Ercc6l
ENSMUSG00000037833	23.7467	3.1364	0.673565	4.65641	3.21769e-06	0.000120016	Sh2d4b
ENSMUSG00000021546	31028.5	1.65877	0.356293	4.65563	3.22985e-06	0.000120079	Hnrnpk
ENSMUSG00000034584	75.5525	1.59125	0.341988	4.65294	3.27235e-06	0.00012114	Exph5
ENSMUSG00000029622	1291.1	1.26063	0.271156	4.64907	3.33428e-06	0.000122648	Arpc1b
ENSMUSG00000021670	2275.04	1.29573	0.278958	4.64489	3.40252e-06	0.000124106	Hmgcr
ENSMUSG00000023039	490.543	1.21884	0.2624	4.64496	3.40146e-06	0.000124106	Krt7
ENSMUSG00000031148	951.043	1.18156	0.254416	4.6442	3.41397e-06	0.000124263	Gpkow
ENSMUSG00000031299	3005.68	1.52892	0.330521	4.6258	3.73149e-06	0.000134133	Pdha1
ENSMUSG00000023906	2181.12	1.48021	0.320236	4.62223	3.79636e-06	0.000135622	Cldn6
ENSMUSG00000040423	1329.14	1.08618	0.23542	4.61379	3.95401e-06	0.000140388	Rc3h1
ENSMUSG00000035765	1028.23	1.30082	0.282373	4.60673	4.09043e-06	0.000144053	Dym
ENSMUSG00000055531	3414.04	1.142	0.248283	4.59961	4.23289e-06	0.000147573	Cpsf6
ENSMUSG00000028788	9797.27	1.11205	0.241802	4.59901	4.24502e-06	0.000147699	Ptp4a2
ENSMUSG00000006998	9139.08	1.15547	0.251532	4.59372	4.35415e-06	0.000149993	Psmd2
ENSMUSG00000026641	646.382	1.41698	0.30882	4.58836	4.46735e-06	0.000152983	Usf1
ENSMUSG00000072492	25.1838	2.7374	0.596926	4.58583	4.52187e-06	0.000154545	Gm10364
ENSMUSG00000011589	214.352	1.3642	0.297625	4.58361	4.57019e-06	0.000155889	Fsd1
ENSMUSG00000053774	1595.96	1.12022	0.244455	4.58253	4.59389e-06	0.00015639	Ubxn7
ENSMUSG00000056201	9600.64	1.05601	0.230551	4.58038	4.64126e-06	0.000157694	Cfl1
ENSMUSG00000022841	2638.63	1.36197	0.297473	4.57847	4.68391e-06	0.000158832	Ap2m1
ENSMUSG00000075232	2088.4	1.28432	0.280571	4.57752	4.70528e-06	0.000159246	Amd1
ENSMUSG00000031349	2437.39	1.73419	0.379218	4.57307	4.80635e-06	0.000161665	Nsdhl
ENSMUSG00000034758	89.6661	1.64401	0.359525	4.57273	4.81401e-06	0.000161665	Tle6
ENSMUSG00000022682	1770.4	1.13326	0.248109	4.56759	4.9336e-06	0.000165043	Rrn3
ENSMUSG00000023832	3879.53	1.15551	0.253014	4.56698	4.94793e-06	0.000165204	Acat2
ENSMUSG00000050914	141.36	1.6801	0.368596	4.55811	5.16162e-06	0.000170373	Ankrd37
ENSMUSG00000045394	2446.86	1.30016	0.285429	4.55512	5.23564e-06	0.000172488	Epcam
ENSMUSG00000006273	3835.02	1.37571	0.302105	4.55376	5.26962e-06	0.000173279	Atp6v1b2
ENSMUSG00000021367	34.5715	3.45595	0.759016	4.5532	5.28356e-06	0.000173409	Edn1
ENSMUSG00000032058	3079	1.37416	0.301952	4.55092	5.34123e-06	0.000174971	Ppp2r1b
ENSMUSG00000104158	18.0708	3.97028	0.873254	4.54654	5.45363e-06	0.000177981	Becn2
ENSMUSG00000114610	23.0348	2.9054	0.639622	4.54237	5.56246e-06	0.000181192	Cyp2c52-ps
ENSMUSG00000022451	2258.53	1.17684	0.259167	4.54085	5.60277e-06	0.000181823	Twf1
ENSMUSG00000073542	663.818	1.15004	0.253918	4.52918	5.92141e-06	0.000191448	Cep76
ENSMUSG00000041261	56.4603	1.78113	0.393381	4.52774	5.96167e-06	0.000192391	Car8
ENSMUSG00000027811	869.087	1.57023	0.346999	4.52516	6.03486e-06	0.000194032	4930579G24Rik
ENSMUSG00000032420	87.1816	1.72484	0.381137	4.5255	6.02516e-06	0.000194032	Nt5e
ENSMUSG00000026229	7772.66	1.17866	0.260683	4.52144	6.14196e-06	0.000196747	Psmd1
ENSMUSG00000110218	26.0528	2.61853	0.579222	4.52077	6.16149e-06	0.000197009	Tincr
ENSMUSG00000083773	6426.13	1.51222	0.335583	4.50626	6.59801e-06	0.000207823	Gm13394
ENSMUSG00000056515	688.616	1.1161	0.247695	4.50596	6.60744e-06	0.000207823	Rab31
ENSMUSG00000049107	179.582	1.30799	0.290885	4.49659	6.90518e-06	0.000215238	Ntf3
ENSMUSG00000059811	2089.38	1.32407	0.294725	4.49255	7.03741e-06	0.000218185	Atl2
ENSMUSG00000022477	1717.43	1.10955	0.247023	4.49168	7.06623e-06	0.000218688	Aco2
ENSMUSG00000055116	266.948	1.38384	0.308459	4.48631	7.24686e-06	0.000223085	Arntl
ENSMUSG00000111001	13.4432	4.77731	1.06811	4.47267	7.72503e-06	0.000236547	Gm8767
ENSMUSG00000021595	4495.4	1.14216	0.255516	4.47	7.82189e-06	0.000238671	Nsun2
ENSMUSG00000027699	2166.43	1.16859	0.26191	4.4618	8.12753e-06	0.000245837	Ect2
ENSMUSG00000053931	13041.9	1.30493	0.292727	4.45785	8.27868e-06	0.000249107	Cnn3
ENSMUSG00000026643	1957.35	1.28192	0.2876	4.45732	8.29902e-06	0.000249127	Nmt2
ENSMUSG00000024772	92.9603	1.66645	0.374286	4.45235	8.49352e-06	0.000252941	Ehd1
ENSMUSG00000028587	520.022	1.22797	0.276243	4.44524	8.77951e-06	0.000259115	Orc1
ENSMUSG00000004885	31446.1	1.09579	0.246673	4.44229	8.90079e-06	0.00026104	Crabp2
ENSMUSG00000030124	89.242	1.83344	0.412695	4.44261	8.88757e-06	0.00026104	Lag3
ENSMUSG00000051674	911.373	1.01519	0.228696	4.43905	9.03577e-06	0.000264106	Dcun1d4
ENSMUSG00000030718	1851.68	1.2604	0.28423	4.43445	9.23091e-06	0.000268904	Ppme1
ENSMUSG00000007480	16.316	3.72819	0.840672	4.43477	9.21701e-06	0.000268904	Mc5r
ENSMUSG00000056293	93.2104	2.2813	0.514599	4.43315	9.28648e-06	0.00027007	Gsdmc2
ENSMUSG00000024190	169.713	1.29322	0.292368	4.42325	9.72257e-06	0.000281339	Dusp1
ENSMUSG00000031889	626.537	1.36146	0.307869	4.4222	9.77006e-06	0.000282243	D230025D16Rik
ENSMUSG00000055200	868.629	1.35769	0.308128	4.40624	1.05179e-05	0.000298944	Sertad3
ENSMUSG00000022114	591.087	1.21248	0.275383	4.40289	1.06817e-05	0.000301553	Spry2
ENSMUSG00000030595	471.903	1.19121	0.270609	4.40197	1.07271e-05	0.000301855	Nfkbib
ENSMUSG00000003779	3413.6	1.55579	0.353416	4.40213	1.07192e-05	0.000301855	Kif20a
ENSMUSG00000071533	2606.68	1.31744	0.299737	4.39532	1.10608e-05	0.000309739	Pcnp
ENSMUSG00000049382	1240.53	1.27991	0.291404	4.39223	1.12195e-05	0.000313677	Krt8
ENSMUSG00000032604	3476.94	1.11926	0.254972	4.38976	1.13477e-05	0.000316751	Qars
ENSMUSG00000002068	1160.01	1.21187	0.276163	4.38825	1.14267e-05	0.000317934	Ccne1
ENSMUSG00000022403	8330.75	1.23736	0.28205	4.38702	1.14915e-05	0.000319223	St13
ENSMUSG00000048915	400.102	1.21703	0.277502	4.38567	1.15631e-05	0.000320702	Efna5
ENSMUSG00000073838	1704.36	1.20095	0.273959	4.38369	1.16688e-05	0.00032233	Tufm
ENSMUSG00000018736	1299.69	1.18254	0.270005	4.3797	1.18841e-05	0.000325445	Ndel1
ENSMUSG00000079523	12317.1	1.01094	0.231317	4.37038	1.24031e-05	0.000337001	Tmsb10
ENSMUSG00000006205	114.215	1.54715	0.354148	4.36865	1.25015e-05	0.000339143	Htra1
ENSMUSG00000017499	2081.64	1.38784	0.317798	4.36706	1.25929e-05	0.000341088	Cdc6
ENSMUSG00000021835	253.052	1.27994	0.293167	4.3659	1.266e-05	0.000342372	Bmp4
ENSMUSG00000026977	2550.78	1.32711	0.304025	4.36515	1.27038e-05	0.000342489	Marchf7
ENSMUSG00000019139	2319.86	1.17996	0.270424	4.36336	1.28077e-05	0.000344756	Isyna1
ENSMUSG00000042719	2688.58	1.08898	0.249598	4.36294	1.28328e-05	0.000344897	Naa25
ENSMUSG00000037408	201.333	1.39763	0.320637	4.35892	1.30707e-05	0.000350748	Cnnm4
ENSMUSG00000028961	978.979	1.13649	0.260796	4.35775	1.31405e-05	0.000352076	Pgd
ENSMUSG00000001156	201.565	1.13557	0.260642	4.35682	1.31967e-05	0.000353038	Mxd1
ENSMUSG00000020277	905.723	1.30936	0.30056	4.3564	1.32219e-05	0.000353168	Pfkl
ENSMUSG00000067786	479.715	1.07795	0.247518	4.35503	1.33046e-05	0.000353611	Nnat
ENSMUSG00000019471	3592.74	1.09764	0.252054	4.35478	1.332e-05	0.000353611	Cdc37
ENSMUSG00000010067	737.449	1.43234	0.328906	4.35487	1.33148e-05	0.000353611	Rassf1
ENSMUSG00000057666	22921.4	1.2911	0.29695	4.34788	1.37459e-05	0.000364361	Gapdh
ENSMUSG00000004902	66.97	2.38686	0.549063	4.34715	1.37918e-05	0.000364804	Slc25a18
ENSMUSG00000017386	653.885	1.23441	0.283971	4.34695	1.38046e-05	0.000364804	Traf4
ENSMUSG00000023110	3022.2	1.09475	0.252256	4.33984	1.42586e-05	0.000374519	Prmt5
ENSMUSG00000025791	237.492	1.54871	0.357078	4.33718	1.44321e-05	0.000378505	Pgm1
ENSMUSG00000017144	3277.03	1.19555	0.275966	4.33225	1.47596e-05	0.000385349	Rnd3
ENSMUSG00000029657	1946.24	0.98558	0.227553	4.3312	1.48296e-05	0.000386595	Hsph1
ENSMUSG00000037725	1838.34	1.16697	0.269625	4.32813	1.50383e-05	0.000391448	Ckap2
ENSMUSG00000025173	2921.71	1.17668	0.271964	4.32661	1.5142e-05	0.000393557	Wdr45b
ENSMUSG00000027639	1152.74	1.19102	0.275432	4.32421	1.53078e-05	0.000396085	Samhd1
ENSMUSG00000063972	63.6801	1.75933	0.406914	4.32359	1.53508e-05	0.000396609	Nr6a1
ENSMUSG00000039384	68.6228	2.14372	0.496302	4.31939	1.56461e-05	0.000402743	Dusp10
ENSMUSG00000020134	1104.39	1.16144	0.268883	4.3195	1.56381e-05	0.000402743	Peli1
ENSMUSG00000021518	1448.35	0.959264	0.222131	4.31845	1.57129e-05	0.00040356	Ptdss1
ENSMUSG00000040652	1261.49	1.17763	0.272783	4.3171	1.58093e-05	0.000404839	Oaz2
ENSMUSG00000074412	458.957	1.52048	0.352248	4.31651	1.58513e-05	0.000405318	Gm10689
ENSMUSG00000022962	1166.34	1.26964	0.294683	4.30849	1.6437e-05	0.00041722	Gart
ENSMUSG00000023944	88414.5	1.08571	0.252069	4.3072	1.65332e-05	0.000419051	Hsp90ab1
ENSMUSG00000063524	18376.8	1.31328	0.305402	4.30018	1.70656e-05	0.000430034	Eno1
ENSMUSG00000072235	8042.4	1.33567	0.310669	4.29932	1.7132e-05	0.000431082	Tuba1a
ENSMUSG00000019851	1020.53	1.26991	0.29661	4.28141	1.85717e-05	0.00046129	Perp
ENSMUSG00000052337	5981.6	0.984556	0.230281	4.27545	1.90751e-05	0.000472443	Immt
ENSMUSG00000023963	1072.54	1.04167	0.243687	4.27464	1.91447e-05	0.000473489	Cyp39a1
ENSMUSG00000019916	1653.61	0.960318	0.224703	4.27372	1.9224e-05	0.0004741	P4ha1
ENSMUSG00000020917	2518.59	0.982434	0.230066	4.27023	1.95269e-05	0.000480207	Acly
ENSMUSG00000029380	74.683	2.21308	0.518617	4.26727	1.97877e-05	0.000485933	Cxcl1
ENSMUSG00000042073	118.749	1.52667	0.358276	4.26115	2.03376e-05	0.000496627	Abhd14b
ENSMUSG00000023980	245.541	1.18934	0.27983	4.25022	2.13558e-05	0.00051915	Taf8
ENSMUSG00000032291	7800.06	0.988205	0.232589	4.24872	2.14997e-05	0.000521338	Crabp1
ENSMUSG00000042688	1140.37	1.15782	0.272656	4.24645	2.17184e-05	0.000525906	Mapk6
ENSMUSG00000031504	114.921	1.88112	0.443272	4.24372	2.19847e-05	0.000531612	Rab20
ENSMUSG00000074825	398.007	1.25558	0.29632	4.23726	2.26267e-05	0.000545619	Itpripl1
ENSMUSG00000048076	10207.5	1.18801	0.280358	4.23749	2.2603e-05	0.000545619	Arf1
ENSMUSG00000025613	29857.8	1.25977	0.297401	4.23592	2.27615e-05	0.000547677	Cct8
ENSMUSG00000039197	4324.21	1.15752	0.27334	4.23473	2.2883e-05	0.000548749	Adk
ENSMUSG00000016253	1936.45	1.23731	0.292537	4.22958	2.34133e-05	0.00055871	Nelfcd
ENSMUSG00000039231	1818.01	0.99726	0.235852	4.22833	2.35432e-05	0.000560149	Suv39h1
ENSMUSG00000030677	3634.38	1.19245	0.282019	4.22825	2.35519e-05	0.000560149	Kif22
ENSMUSG00000020525	538.655	1.05383	0.249589	4.22227	2.41858e-05	0.00057209	Ppm1d
ENSMUSG00000007039	2781.78	1.00751	0.238609	4.22241	2.41705e-05	0.00057209	Ddah2
ENSMUSG00000030120	1949.15	1.09631	0.259885	4.21845	2.45982e-05	0.000578691	Mlf2
ENSMUSG00000052833	10810.4	1.27802	0.303397	4.21236	2.5272e-05	0.000592935	Sae1
ENSMUSG00000025930	33.6142	1.96475	0.467136	4.20595	2.59991e-05	0.000607532	Msc
ENSMUSG00000025612	532.147	1.01575	0.241555	4.20505	2.61024e-05	0.000609127	Bach1
ENSMUSG00000036932	2269.31	0.991298	0.236004	4.20034	2.66516e-05	0.000618772	Aifm1
ENSMUSG00000029670	1299.47	1.04562	0.24894	4.20028	2.66583e-05	0.000618772	Ing3
ENSMUSG00000030079	3136.69	1.25136	0.297987	4.19938	2.67641e-05	0.000619571	Ruvbl1
ENSMUSG00000029056	519.072	1.13798	0.271077	4.19798	2.69301e-05	0.000622584	Pank4
ENSMUSG00000024131	29.7584	2.30506	0.549811	4.19245	2.75953e-05	0.000637115	Slc3a1
ENSMUSG00000042258	22.823	3.15049	0.751637	4.1915	2.77116e-05	0.00063895	Isl1
ENSMUSG00000050379	2116.21	1.12006	0.267337	4.18971	2.79317e-05	0.000643169	Septin6
ENSMUSG00000001467	4528.42	1.10224	0.263168	4.18836	2.80978e-05	0.000646011	Cyp51
ENSMUSG00000032435	2392.99	1.07033	0.255565	4.1881	2.81295e-05	0.000646011	Dync1li1
ENSMUSG00000025240	412.57	1.49099	0.356075	4.18728	2.82312e-05	0.000647491	Sacm1l
ENSMUSG00000027559	6266.34	1.36343	0.325773	4.1852	2.8492e-05	0.000651749	Car3
ENSMUSG00000015748	1899.15	1.00574	0.240975	4.17361	2.99807e-05	0.000679536	Prpf3
ENSMUSG00000020818	395.963	0.967337	0.231762	4.17384	2.99509e-05	0.000679536	Mfsd11
ENSMUSG00000038876	624.263	1.07917	0.258736	4.17094	3.03346e-05	0.000686661	Rnf146
ENSMUSG00000042743	383.569	1.13765	0.272784	4.17049	3.03944e-05	0.00068712	Sgtb
ENSMUSG00000032482	66.6727	1.81787	0.436077	4.16869	3.06361e-05	0.000691684	Cspg5
ENSMUSG00000028678	2720.55	1.07183	0.257148	4.16814	3.07101e-05	0.000692453	Kif2c
ENSMUSG00000010047	1224.77	1.00394	0.241104	4.16391	3.1284e-05	0.000702656	Hyal2
ENSMUSG00000048058	870.287	0.959001	0.23035	4.16324	3.1376e-05	0.000703812	Ldlrad3
ENSMUSG00000002524	2581.34	0.993671	0.238747	4.16202	3.1544e-05	0.000705756	Puf60
ENSMUSG00000015149	431.468	1.14561	0.275425	4.15942	3.19052e-05	0.000711089	Sirt2
ENSMUSG00000078812	31292.2	1.35252	0.325255	4.15833	3.20577e-05	0.000712658	Eif5a
ENSMUSG00000020152	3675.84	0.918583	0.220945	4.15752	3.21727e-05	0.000713698	Actr2
ENSMUSG00000027654	835.785	1.33942	0.322621	4.15169	3.30024e-05	0.000729921	Fam83d
ENSMUSG00000026728	14589.4	0.9079	0.218711	4.15114	3.30819e-05	0.000730749	Vim
ENSMUSG00000020986	1580.15	1.22031	0.294179	4.14818	3.35127e-05	0.000738386	Sec23a
ENSMUSG00000032939	2558.76	1.1893	0.286751	4.1475	3.36131e-05	0.000739659	Nup93
ENSMUSG00000014905	383.979	1.46912	0.354603	4.14301	3.42778e-05	0.000751429	Dnajb9
ENSMUSG00000029148	1985.87	1.28576	0.312093	4.11981	3.79183e-05	0.000818828	Nrbp1
ENSMUSG00000085893	28.5245	2.26603	0.550264	4.11807	3.82056e-05	0.000824008	Gm12091
ENSMUSG00000001098	184.032	1.15116	0.279622	4.11685	3.84089e-05	0.000827364	Kctd10
ENSMUSG00000030096	980.747	1.00778	0.244859	4.11576	3.85912e-05	0.000829234	Slc6a6
ENSMUSG00000057551	987.805	1.21306	0.294789	4.11501	3.87156e-05	0.000830878	Zfp317
ENSMUSG00000020086	2756.58	1.29831	0.315798	4.1112	3.9361e-05	0.000842645	Macroh2a2
ENSMUSG00000039990	886.365	0.89479	0.217814	4.10804	3.99024e-05	0.000851089	Edrf1
ENSMUSG00000079562	4383.29	1.06729	0.259963	4.10556	4.0333e-05	0.000858163	Maea
ENSMUSG00000048878	301.135	1.13471	0.276416	4.10507	4.04186e-05	0.000858931	Hexim1
ENSMUSG00000030058	2512.31	1.0385	0.253441	4.09759	4.17479e-05	0.000880713	Copg1
ENSMUSG00000053801	1433.49	1.16381	0.284106	4.0964	4.19628e-05	0.000884173	Grwd1
ENSMUSG00000038506	508.725	1.1584	0.283181	4.09066	4.30141e-05	0.000905225	Dcun1d2
ENSMUSG00000025508	27772.5	0.823712	0.201491	4.08808	4.34951e-05	0.00091424	Rplp2
ENSMUSG00000033998	261.906	1.31439	0.321912	4.08308	4.44429e-05	0.00092877	Kcnk1
ENSMUSG00000021069	614.081	1.10863	0.271523	4.08302	4.44539e-05	0.00092877	Pygl
ENSMUSG00000056770	1242.6	0.939645	0.230094	4.08375	4.43148e-05	0.00092877	Setd3
ENSMUSG00000021747	208.775	1.21789	0.298326	4.0824	4.45725e-05	0.000930131	Cfap20dc
ENSMUSG00000005506	365.644	1.04041	0.254894	4.08174	4.47003e-05	0.000931676	Celf1
ENSMUSG00000010914	2565.89	1.19017	0.291831	4.07829	4.53675e-05	0.000939942	Pdhx
ENSMUSG00000021385	526.74	1.12475	0.275904	4.07658	4.57037e-05	0.000944653	Ippk
ENSMUSG00000025228	1772.61	0.990385	0.243042	4.07495	4.60242e-05	0.000950146	Actr1a
ENSMUSG00000035242	22645.1	1.18118	0.289945	4.07379	4.62532e-05	0.000952608	Oaz1
ENSMUSG00000062116	650.439	1.37855	0.338752	4.0695	4.71134e-05	0.000966882	Zfp954
ENSMUSG00000020212	903.92	0.980279	0.240934	4.06867	4.72827e-05	0.000969212	Mdm1
ENSMUSG00000081111	38.9509	2.00761	0.49363	4.06702	4.76174e-05	0.000973773	Gm5913
ENSMUSG00000028194	599.404	0.917976	0.225766	4.06606	4.78154e-05	0.000976212	Ddah1
ENSMUSG00000021975	1143.09	1.18192	0.29069	4.06589	4.78491e-05	0.000976212	Ints9
ENSMUSG00000019878	466.37	1.06191	0.261402	4.06237	4.85768e-05	0.000986421	Hsf2
ENSMUSG00000018569	545.057	1.31471	0.323666	4.06194	4.86666e-05	0.000987091	Cldn7
ENSMUSG00000030041	29.9231	2.28387	0.562391	4.061	4.88638e-05	0.000989783	M1ap
ENSMUSG00000003970	56400.4	1.12236	0.27653	4.05871	4.93439e-05	0.000993076	Rpl8
ENSMUSG00000012535	1951.6	1.10456	0.272731	4.04997	5.12233e-05	0.00102458	Tnpo3
ENSMUSG00000061079	1553.12	1.24673	0.308083	4.04675	5.19342e-05	0.00103641	Zfp143
ENSMUSG00000022905	1763.32	0.908245	0.224958	4.03739	5.40498e-05	0.00107003	Kpna1
ENSMUSG00000064181	1388.95	1.18763	0.294679	4.03025	5.57173e-05	0.0010943	Rab3ip
ENSMUSG00000011752	3018.64	1.34763	0.334763	4.02561	5.68287e-05	0.00110985	Pgam1
ENSMUSG00000048027	192.292	1.12607	0.279791	4.0247	5.70488e-05	0.0011129	Rgmb
ENSMUSG00000037892	233.758	1.11525	0.277506	4.01882	5.84892e-05	0.00113844	Pcdh18
ENSMUSG00000027398	647.235	1.52774	0.380365	4.01652	5.90647e-05	0.00114579	Il1b
ENSMUSG00000020034	166.294	1.50862	0.37612	4.01101	6.04596e-05	0.0011674	Tcp11l2
ENSMUSG00000022234	38783.2	1.15874	0.288925	4.01053	6.05824e-05	0.0011674	Cct5
ENSMUSG00000024922	35.6098	2.02491	0.504887	4.01062	6.05585e-05	0.0011674	Ovol1
ENSMUSG00000059040	2644.04	1.30847	0.326573	4.00666	6.15823e-05	0.00118404	Eno1b
ENSMUSG00000025094	140.602	1.61471	0.403613	4.00063	6.31735e-05	0.00120928	Slc18a2
ENSMUSG00000063802	1164.87	0.950693	0.237783	3.99815	6.38407e-05	0.00122071	Hspbp1
ENSMUSG00000027593	928.158	1.08467	0.271553	3.99431	6.48819e-05	0.00123653	Raly
ENSMUSG00000046404	336.182	1.28348	0.321633	3.99049	6.59359e-05	0.00125113	Yod1
ENSMUSG00000025428	15569.3	1.21318	0.304002	3.99071	6.58765e-05	0.00125113	Atp5a1
ENSMUSG00000001416	20864.3	1.10695	0.277419	3.99016	6.60282e-05	0.00125151	Cct3
ENSMUSG00000023175	7469.86	1.0395	0.260644	3.98818	6.65815e-05	0.00126062	Bsg
ENSMUSG00000053964	38.4725	2.38991	0.599356	3.98747	6.67828e-05	0.00126305	Lgals4
ENSMUSG00000018042	2467.78	0.971845	0.243872	3.98506	6.7462e-05	0.00127451	Cyb5r3
ENSMUSG00000026718	1314.86	1.11367	0.27952	3.98422	6.77022e-05	0.00127766	Stam
ENSMUSG00000045969	1218.67	0.960241	0.241633	3.97396	7.06876e-05	0.00132535	Ing1
ENSMUSG00000044934	178.365	1.79778	0.452922	3.96929	7.20875e-05	0.00135014	Zfp367
ENSMUSG00000050199	560.85	1.11186	0.280521	3.96355	7.38433e-05	0.00138005	Lgr4
ENSMUSG00000006356	709.878	0.944524	0.238357	3.96265	7.41237e-05	0.0013838	Crip2
ENSMUSG00000029863	1382.37	0.969141	0.244592	3.96228	7.42387e-05	0.00138446	Casp2
ENSMUSG00000015312	107.338	1.48837	0.376056	3.95783	7.56327e-05	0.00140743	Gadd45b
ENSMUSG00000029472	8561.47	1.18131	0.298558	3.95673	7.59841e-05	0.00141095	Anapc5
ENSMUSG00000003411	103.067	1.33423	0.337374	3.95474	7.66171e-05	0.00141966	Rab3b
ENSMUSG00000041488	473.398	0.904547	0.228894	3.95182	7.75592e-05	0.00143559	Stx3
ENSMUSG00000039483	246.727	0.991854	0.251064	3.9506	7.79544e-05	0.00144137	Asb6
ENSMUSG00000076441	103.002	1.47217	0.372682	3.95022	7.80801e-05	0.00144216	Ass1
ENSMUSG00000110469	51.092	2.1501	0.544366	3.94973	7.82393e-05	0.00144345	Gm10358
ENSMUSG00000036208	506.932	0.962392	0.243716	3.94882	7.85381e-05	0.00144345	Nepro
ENSMUSG00000071470	42.3403	1.92034	0.486477	3.94745	7.89883e-05	0.00144968	Ccnb1ip1
ENSMUSG00000107383	4147.67	1.35443	0.343359	3.94466	7.99141e-05	0.00146203	Gm4366
ENSMUSG00000017221	1438.24	0.988447	0.250906	3.9395	8.1651e-05	0.00149067	Psmd3
ENSMUSG00000034158	1412.25	1.03792	0.263642	3.93686	8.25547e-05	0.00150558	Lrrc58
ENSMUSG00000020230	815.658	1.25837	0.319853	3.93423	8.34646e-05	0.00151899	Prmt2
ENSMUSG00000038212	762.426	1.19161	0.303096	3.93148	8.44257e-05	0.00153166	Mfsd14b
ENSMUSG00000029185	109.125	1.19978	0.305686	3.92487	8.6776e-05	0.00156938	Fam114a1
ENSMUSG00000028437	1847.74	0.971496	0.247613	3.92344	8.72923e-05	0.00157673	Ubap1
ENSMUSG00000046364	21279.6	0.858356	0.218792	3.92316	8.7394e-05	0.00157673	Rpl27a
ENSMUSG00000018583	6783.45	1.02831	0.262163	3.92242	8.76625e-05	0.00157883	G3bp1
ENSMUSG00000034674	358.653	1.20443	0.307118	3.92173	8.7916e-05	0.00158012	Tdg
ENSMUSG00000039653	33.7315	2.62564	0.670218	3.91759	8.94397e-05	0.00159633	Baat
ENSMUSG00000030357	10773.9	0.999569	0.255153	3.91753	8.94616e-05	0.00159633	Fkbp4
ENSMUSG00000025393	51527.9	1.02674	0.262075	3.91775	8.93808e-05	0.00159633	Atp5b
ENSMUSG00000020612	7674.7	0.877146	0.223832	3.91876	8.90041e-05	0.00159633	Prkar1a
ENSMUSG00000009470	2677.39	1.0323	0.263462	3.91821	8.92091e-05	0.00159633	Tnpo1
ENSMUSG00000018899	375.389	1.05038	0.268306	3.91487	9.04542e-05	0.00160579	Irf1
ENSMUSG00000037577	24.4499	2.23495	0.571764	3.90888	9.27262e-05	0.00163942	Ephx3
ENSMUSG00000043872	493.89	1.05362	0.269573	3.90848	9.28791e-05	0.00164046	Zmym1
ENSMUSG00000039770	1535.35	1.01464	0.259741	3.90634	9.37032e-05	0.00165165	Ypel5
ENSMUSG00000069259	29.1601	2.28443	0.585051	3.90466	9.43577e-05	0.00165982	Prl6a1
ENSMUSG00000066877	328.78	1.06372	0.272568	3.90258	9.51725e-05	0.00167076	Nck2
ENSMUSG00000039328	274.31	1.04637	0.268321	3.89967	9.63227e-05	0.00168245	Rnf122
ENSMUSG00000026473	727.827	0.937644	0.240578	3.89746	9.72076e-05	0.0016962	Glul
ENSMUSG00000003200	762.093	0.934618	0.239829	3.89702	9.73835e-05	0.00169756	Sh3gl1
ENSMUSG00000027194	362.227	1.11871	0.287433	3.89208	9.93876e-05	0.00172557	Ttc17
ENSMUSG00000035270	23.3921	2.38414	0.612561	3.89209	9.93846e-05	0.00172557	Impg2
ENSMUSG00000058587	1331.16	0.924358	0.237878	3.88586	0.00010197	0.00176181	Tmod3
ENSMUSG00000022673	3920.57	1.00751	0.259291	3.88565	0.000102057	0.00176181	Mcm4
ENSMUSG00000034640	1438.43	0.967303	0.249131	3.88271	0.000103299	0.00177396	Tiparp
ENSMUSG00000006333	64823.5	0.837224	0.215721	3.88105	0.000104005	0.00178257	Rps9
ENSMUSG00000027671	6792.61	1.2181	0.313878	3.88079	0.000104117	0.00178271	Actl6a
ENSMUSG00000038187	790.123	1.17856	0.303753	3.88	0.000104458	0.00178505	Btbd10
ENSMUSG00000035828	221.495	1.25688	0.324323	3.87539	0.000106455	0.0018138	Pim3
ENSMUSG00000027828	6505.54	0.864307	0.223082	3.8744	0.000106887	0.00181938	Ssr3
ENSMUSG00000036752	6054.69	1.15698	0.298669	3.8738	0.000107152	0.00181991	Tubb4b
ENSMUSG00000034906	2643.8	1.083	0.279631	3.87295	0.000107526	0.00182133	Ncaph
ENSMUSG00000055044	712.802	1.15665	0.298734	3.87183	0.00010802	0.00182791	Pdlim1
ENSMUSG00000020265	7183.37	1.14818	0.296796	3.86858	0.000109472	0.00184888	Sumo3
ENSMUSG00000004880	1619.73	0.865074	0.223688	3.86733	0.000110034	0.00185347	Lbr
ENSMUSG00000041431	9357.44	1.20646	0.312161	3.86486	0.000111153	0.00186819	Ccnb1
ENSMUSG00000004951	642.83	1.31614	0.340633	3.86382	0.000111628	0.00187254	Hspb1
ENSMUSG00000020038	393.468	1.01106	0.261804	3.8619	0.000112508	0.00188273	Cry1
ENSMUSG00000033732	4912.77	0.878751	0.227662	3.85989	0.00011344	0.0018938	Sf3b3
ENSMUSG00000047412	1003.18	0.832585	0.215874	3.8568	0.00011488	0.00191232	Zbtb44
ENSMUSG00000030007	26972.6	1.10517	0.286714	3.85462	0.000115911	0.00192762	Cct7
ENSMUSG00000048376	965.278	0.869521	0.22568	3.8529	0.000116727	0.00193749	F2r
ENSMUSG00000026576	248.557	1.12034	0.291185	3.84751	0.000119323	0.00197116	Atp1b1
ENSMUSG00000027079	2638.39	1.38725	0.360712	3.84586	0.000120132	0.00197138	Clp1
ENSMUSG00000089809	144.938	1.12269	0.291872	3.84653	0.000119804	0.00197138	A930011G23Rik
ENSMUSG00000025871	4350.11	1.06268	0.276316	3.84588	0.00012012	0.00197138	4833439L19Rik
ENSMUSG00000003198	526.179	1.39346	0.362271	3.84647	0.00011983	0.00197138	Zfp959
ENSMUSG00000057522	2596.51	1.17478	0.305596	3.84423	0.000120932	0.00198265	Spop
ENSMUSG00000031729	4960.52	1.01493	0.26408	3.84328	0.0001214	0.00198283	Ist1
ENSMUSG00000029223	1125	1.12956	0.294002	3.84202	0.000122025	0.00198793	Uchl1
ENSMUSG00000037370	91.7222	1.41675	0.368756	3.84196	0.000122056	0.00198793	Enpp1
ENSMUSG00000013663	659.135	0.93033	0.24214	3.84212	0.000121978	0.00198793	Pten
ENSMUSG00000004849	1342.92	1.04462	0.271941	3.84134	0.000122362	0.00199105	Ap1s1
ENSMUSG00000025364	10468.1	1.03134	0.268686	3.83847	0.000123805	0.00200547	Pa2g4
ENSMUSG00000042348	1222.44	1.17482	0.306069	3.83843	0.000123826	0.00200547	Arl15
ENSMUSG00000028937	1321.66	1.18813	0.30957	3.83801	0.000124035	0.00200699	Acot7
ENSMUSG00000001829	805.273	0.890412	0.232173	3.83512	0.000125502	0.00202694	Clpb
ENSMUSG00000029703	695.032	1.17793	0.307345	3.83259	0.000126803	0.00204222	Lrwd1
ENSMUSG00000020737	12952	1.00477	0.262255	3.83127	0.000127482	0.0020475	Jpt1
ENSMUSG00000005410	3986.22	0.998421	0.260696	3.82983	0.000128234	0.00205205	Mcm5
ENSMUSG00000062867	8934.86	1.1363	0.296861	3.82772	0.000129334	0.00206387	Impdh2
ENSMUSG00000032193	99.3994	1.74112	0.455066	3.82608	0.000130198	0.00207397	Ldlr
ENSMUSG00000062901	1355.58	0.936673	0.244887	3.82492	0.000130817	0.00207799	Klhl24
ENSMUSG00000019989	103.778	1.25995	0.32964	3.82221	0.000132261	0.0020971	Enpp3
ENSMUSG00000053907	1895.86	1.40767	0.368362	3.82144	0.000132675	0.00210174	Mat2a
ENSMUSG00000009293	759.501	1.0913	0.285742	3.81917	0.000133902	0.00211731	Ube2g2
ENSMUSG00000080775	295.86	1.15703	0.303198	3.81607	0.000135595	0.00213824	Gm6368
ENSMUSG00000030714	745.808	0.968678	0.253828	3.81628	0.00013548	0.00213824	Sgf29
ENSMUSG00000036822	1658.73	0.904855	0.237367	3.81205	0.00013782	0.00216741	Topors
ENSMUSG00000057457	15.3856	3.71547	0.976538	3.80474	0.000141954	0.00222037	Phex
ENSMUSG00000034994	13271	1.00576	0.264333	3.8049	0.000141864	0.00222037	Eef2
ENSMUSG00000044288	115.261	1.18816	0.312439	3.80283	0.00014305	0.00223348	Cnr1
ENSMUSG00000061983	32378.9	0.830686	0.218588	3.80023	0.000144559	0.00225277	Rps12
ENSMUSG00000047213	1364.03	0.963327	0.253579	3.79893	0.000145324	0.00225562	Ythdf3
ENSMUSG00000029328	10483.3	0.875884	0.230724	3.79623	0.000146911	0.00227535	Hnrnpdl
ENSMUSG00000097388	42.4722	1.67118	0.440576	3.79317	0.000148734	0.00230153	Gm3200
ENSMUSG00000020471	762.415	1.14643	0.302363	3.79157	0.000149696	0.00231418	Pold2
ENSMUSG00000037805	20627.3	0.899371	0.237235	3.79106	0.000150005	0.00231501	Rpl10a
ENSMUSG00000004937	1684.84	1.08137	0.285294	3.79039	0.000150411	0.00231761	Sgta
ENSMUSG00000019539	443.145	0.970191	0.256327	3.78498	0.000153721	0.00235708	Rcn3
ENSMUSG00000021190	767.78	0.863829	0.228235	3.78482	0.000153817	0.00235708	Lgmn
ENSMUSG00000025858	2767	1.06599	0.281764	3.78326	0.000154785	0.00236982	Get4
ENSMUSG00000015932	8989.59	1.16715	0.308753	3.7802	0.000156704	0.00239454	Dstn
ENSMUSG00000038975	6255.24	0.881511	0.233246	3.77932	0.000157258	0.00239922	Rabggtb
ENSMUSG00000052997	10252.6	1.13278	0.299791	3.77858	0.000157722	0.00240419	Uba2
ENSMUSG00000032508	76.9837	1.32529	0.350779	3.77813	0.00015801	0.00240647	Myd88
ENSMUSG00000031447	2793.79	0.901413	0.23903	3.77113	0.000162508	0.00246417	Lamp1
ENSMUSG00000029147	2359	0.944256	0.250536	3.76894	0.000163945	0.00248076	Ppm1g
ENSMUSG00000032231	5102.29	1.07806	0.286206	3.76672	0.000165405	0.00249936	Anxa2
ENSMUSG00000025139	808.9	0.995621	0.264383	3.76583	0.000165997	0.00250394	Tollip
ENSMUSG00000042699	5523.91	0.819244	0.217748	3.76234	0.00016833	0.00253473	Dhx9
ENSMUSG00000026355	9371	1.148	0.305291	3.76033	0.000169687	0.00255075	Mcm6
ENSMUSG00000018882	4190.93	1.03963	0.276708	3.75715	0.00017186	0.00258117	Mrpl45
ENSMUSG00000035372	694.755	1.03724	0.276129	3.75637	0.000172397	0.00258699	1810055G02Rik
ENSMUSG00000028452	2430.67	0.89365	0.238295	3.75018	0.000176706	0.0026448	Vcp
ENSMUSG00000039754	285.449	1.23857	0.330499	3.74759	0.000178543	0.00266541	Alkbh4
ENSMUSG00000020669	387.253	1.12295	0.299689	3.74705	0.000178928	0.00266885	Sh3yl1
ENSMUSG00000022193	2447.84	0.966203	0.257874	3.74681	0.000179101	0.00266914	Psmb5
ENSMUSG00000033294	1974.65	1.11516	0.297727	3.74558	0.000179978	0.00267761	Noc4l
ENSMUSG00000041926	711.218	0.881203	0.235296	3.74508	0.000180333	0.00267831	Rnpep
ENSMUSG00000020482	728.742	0.900749	0.240511	3.74515	0.000180288	0.00267831	Ccdc117
ENSMUSG00000018362	8565.88	1.27755	0.341187	3.74444	0.0001808	0.00268295	Kpna2
ENSMUSG00000020308	1042.27	1.03257	0.275849	3.74323	0.00018167	0.00268896	Tpgs1
ENSMUSG00000037649	261.201	0.96949	0.258985	3.74343	0.000181529	0.00268896	H2-DMa
ENSMUSG00000033721	374.115	1.05258	0.28142	3.74025	0.000183838	0.00271411	Vav3
ENSMUSG00000066487	52.288	1.53142	0.409529	3.73947	0.000184405	0.00272017	Gm5786
ENSMUSG00000025651	6454.96	1.0729	0.287031	3.73793	0.000185543	0.00272539	Uqcrc1
ENSMUSG00000049119	135.035	1.14604	0.306724	3.73639	0.000186679	0.00273975	Fam110b
ENSMUSG00000032897	1382.3	1.07321	0.287361	3.73472	0.000187927	0.00275573	Nfyc
ENSMUSG00000071656	9.51458	4.26448	1.14205	3.73405	0.000188429	0.00276076	Lrrn4cl
ENSMUSG00000027404	24711.8	0.990327	0.265537	3.72952	0.000191842	0.00279896	Snrpb
ENSMUSG00000062861	177.87	1.12437	0.301473	3.72957	0.000191804	0.00279896	Zfp28
ENSMUSG00000025041	674.459	0.863107	0.231492	3.72846	0.000192656	0.00280848	Nt5c2
ENSMUSG00000033737	1554.23	0.997387	0.26783	3.72396	0.000196124	0.00285461	Fndc3c1
ENSMUSG00000048373	307.427	2.80989	0.754732	3.72303	0.000196845	0.00285755	Fgfbp1
ENSMUSG00000029111	1342.22	1.06684	0.286584	3.72262	0.000197164	0.00285978	Nelfa
ENSMUSG00000020849	25551.6	1.04171	0.279851	3.72238	0.000197353	0.00286014	Ywhae
ENSMUSG00000020840	5341.84	1.1062	0.29737	3.71996	0.000199255	0.00288289	Blmh
ENSMUSG00000008435	828.398	0.866249	0.233145	3.7155	0.000202801	0.00291234	Rdh13
ENSMUSG00000032092	198.663	1.18654	0.319341	3.71559	0.000202727	0.00291234	Mpzl2
ENSMUSG00000015869	4016.52	1.03154	0.27763	3.71552	0.000202787	0.00291234	Prpsap1
ENSMUSG00000004864	125.521	1.33892	0.360335	3.71576	0.000202595	0.00291234	Mapk13
ENSMUSG00000027187	2294.14	1.15334	0.310459	3.71496	0.000203239	0.00291623	Cat
ENSMUSG00000089911	978.586	1.14165	0.307825	3.70876	0.000208276	0.00296731	Mfsd14a
ENSMUSG00000055436	10694.7	0.859693	0.231826	3.70835	0.000208616	0.00296731	Srsf11
ENSMUSG00000028405	1707.64	0.909864	0.245321	3.70887	0.000208185	0.00296731	Aco1
ENSMUSG00000024077	799.518	1.03268	0.278601	3.70665	0.000210015	0.00298142	Strn
ENSMUSG00000034024	20687.3	0.943889	0.254685	3.7061	0.000210473	0.00298548	Cct2
ENSMUSG00000003099	491.229	1.09189	0.295037	3.70086	0.000214868	0.00304092	Ppp5c
ENSMUSG00000032076	1646.78	0.921209	0.24892	3.70082	0.000214906	0.00304092	Cadm1
ENSMUSG00000001247	191.724	1.06549	0.288076	3.69863	0.000216764	0.00305724	Lsr
ENSMUSG00000025665	747.918	1.27172	0.343897	3.69798	0.000217324	0.00306017	Rps6ka6
ENSMUSG00000004936	1630.45	1.03377	0.279641	3.69677	0.000218364	0.00306651	Map2k1
ENSMUSG00000053469	1384.07	0.972773	0.263151	3.69663	0.000218481	0.00306651	Tg
ENSMUSG00000021594	397.884	1.05651	0.285933	3.69497	0.000219916	0.00308208	Srd5a1
ENSMUSG00000057615	37.8185	1.64446	0.445511	3.69118	0.000223215	0.00312285	Ldoc1
ENSMUSG00000070473	285.421	1.26565	0.343381	3.68584	0.000227945	0.00318134	Cldn3
ENSMUSG00000018543	48.368	1.60566	0.436078	3.68205	0.000231363	0.00321985	1700001P01Rik
ENSMUSG00000061904	26061	0.919901	0.249937	3.68053	0.000232751	0.00323281	Slc25a3
ENSMUSG00000022964	996.122	1.05755	0.287466	3.67886	0.00023428	0.00324885	Tmem50b
ENSMUSG00000082454	97.5863	1.31254	0.356988	3.67672	0.000236256	0.00327365	Gm12183
ENSMUSG00000001783	5106.52	1.0847	0.295887	3.66594	0.000246432	0.0033903	Rtcb
ENSMUSG00000033047	12220.3	1.13556	0.309832	3.66509	0.00024725	0.00339616	Eif3l
ENSMUSG00000030872	724.107	0.937264	0.255952	3.66188	0.000250372	0.00343633	Gga2
ENSMUSG00000025002	12.142	3.59179	0.981362	3.66	0.000252212	0.00345474	Cyp2c55
ENSMUSG00000028633	2790.38	1.07689	0.294754	3.6535	0.000258688	0.00353092	Ctps
ENSMUSG00000047676	12508.6	1.06323	0.291144	3.6519	0.000260305	0.0035502	Rpsa-ps10
ENSMUSG00000046818	115.13	1.47304	0.403596	3.64978	0.000262468	0.0035769	Ddit4l
ENSMUSG00000022559	643.84	0.875377	0.239926	3.64852	0.000263755	0.00359161	Fbxl6
ENSMUSG00000028195	159.816	1.28942	0.353908	3.64339	0.00026907	0.00365253	Ccn1
ENSMUSG00000029326	1087.63	1.0846	0.29787	3.64118	0.000271391	0.00367256	Enoph1
ENSMUSG00000020385	2785.21	0.91069	0.250457	3.63611	0.000276785	0.00373391	Clk4
ENSMUSG00000030062	5526.6	0.882734	0.243034	3.63214	0.000281082	0.00378305	Rpn1
ENSMUSG00000097954	22.7912	2.18485	0.601996	3.62935	0.000284133	0.00381525	Gm4217
ENSMUSG00000001642	2932.27	1.20777	0.332797	3.62915	0.000284361	0.00381536	Akr1b3
ENSMUSG00000020719	24767.8	0.948024	0.261406	3.62664	0.000287136	0.00384665	Ddx5
ENSMUSG00000029247	22240	1.10106	0.303621	3.62641	0.00028739	0.00384708	Paics
ENSMUSG00000024304	1558.33	0.794047	0.219005	3.62571	0.000288173	0.0038546	Cdh2
ENSMUSG00000025137	305.463	0.960722	0.265536	3.61805	0.000296829	0.00396426	Pcyt2
ENSMUSG00000037526	422.473	0.901538	0.249268	3.61674	0.000298338	0.00398136	Atg14
ENSMUSG00000041438	4196.06	1.03811	0.287121	3.61558	0.000299675	0.00399613	Utp4
ENSMUSG00000024767	4897.99	1.01601	0.28103	3.61532	0.000299981	0.00399714	Otub1
ENSMUSG00000029482	189.085	1.00715	0.278598	3.61505	0.000300288	0.00399816	Aacs
ENSMUSG00000041859	4369.86	0.857028	0.237202	3.61307	0.000302593	0.00402576	Mcm3
ENSMUSG00000056904	57.7193	1.49047	0.412573	3.61263	0.000303106	0.00402793	Gm5620
ENSMUSG00000016018	3860.12	0.902926	0.249943	3.61253	0.00030322	0.00402793	Mtrex
ENSMUSG00000004266	184.06	1.06612	0.295194	3.61159	0.00030432	0.00403637	Ptpn6
ENSMUSG00000022553	3551.51	1.00912	0.279702	3.60786	0.000308739	0.00407939	Maf1
ENSMUSG00000040264	37.6536	2.05803	0.571116	3.60352	0.000313933	0.00413231	Gbp2b
ENSMUSG00000027883	2277.54	1.14188	0.317166	3.60025	0.000317914	0.00417205	Gpsm2
ENSMUSG00000027496	6818.39	1.1521	0.320072	3.59951	0.000318822	0.0041808	Aurka
ENSMUSG00000030269	632.609	0.990733	0.27528	3.599	0.000319444	0.00418581	Mtmr14
ENSMUSG00000085234	47.0484	1.68856	0.469499	3.59653	0.000322493	0.0042162	Gm15614
ENSMUSG00000027540	1063.31	0.786133	0.218624	3.59583	0.000323361	0.00422438	Ptpn1
ENSMUSG00000022800	3341.02	0.82602	0.229795	3.59459	0.000324897	0.00423806	Fyttd1
ENSMUSG00000117822	87.337	1.36499	0.379779	3.59416	0.000325435	0.0042419	Eef1a1-ps1
ENSMUSG00000003309	216.491	1.53822	0.428041	3.59363	0.000326098	0.00424734	Ap1m2
ENSMUSG00000024165	4638.82	1.24536	0.346795	3.59105	0.000329349	0.00428005	Jpt2
ENSMUSG00000031953	353.59	0.967413	0.269442	3.59042	0.000330139	0.00428392	Tmem170
ENSMUSG00000022330	17.4627	2.6219	0.73039	3.58973	0.000331027	0.00429222	Osr2
ENSMUSG00000028757	5940.62	0.866025	0.24154	3.58543	0.000336525	0.00435701	Ddost
ENSMUSG00000031812	6883.82	0.982863	0.274178	3.58476	0.000337385	0.00436489	Map1lc3b
ENSMUSG00000042305	2768.9	0.952054	0.265824	3.58152	0.000341606	0.00441564	Tmem183a
ENSMUSG00000061531	8.40055	4.66144	1.30171	3.581	0.000342275	0.00441828	Tmem236
ENSMUSG00000004264	6438.52	1.08346	0.302644	3.57998	0.000343624	0.0044324	Phb2
ENSMUSG00000036564	70.6418	1.36482	0.381321	3.57918	0.000344669	0.00444245	Ndrg4
ENSMUSG00000020911	355.157	1.00044	0.279545	3.5788	0.000345171	0.00444245	Krt19
ENSMUSG00000021337	14.0194	2.94895	0.823983	3.5789	0.000345047	0.00444245	Scgn
ENSMUSG00000047139	8228.77	0.984562	0.275148	3.57831	0.000345828	0.00444761	Cd24a
ENSMUSG00000025156	2988.05	1.03922	0.290529	3.577	0.000347554	0.00445989	Gps1
ENSMUSG00000028334	1447.79	0.929086	0.259787	3.57634	0.00034844	0.00446466	Nans
ENSMUSG00000031696	4667.64	1.04047	0.291011	3.57536	0.000349751	0.00447815	Vps35
ENSMUSG00000003072	7334.84	0.932638	0.260946	3.57406	0.000351485	0.00449704	Atp5d
ENSMUSG00000073016	31.0699	1.75767	0.492298	3.57034	0.000356518	0.00454802	Uprt
ENSMUSG00000104802	55.0613	1.54496	0.432841	3.56935	0.000357862	0.00455847	Gm5869
ENSMUSG00000001473	955.282	0.931512	0.261044	3.5684	0.000359164	0.00456836	Tubb6
ENSMUSG00000015889	3259.67	0.90771	0.254431	3.56761	0.000360253	0.00457598	Lta4h
ENSMUSG00000036103	502.403	0.920559	0.258035	3.56758	0.00036029	0.00457598	Colec12
ENSMUSG00000032640	1223.14	0.788932	0.221215	3.56636	0.000361978	0.00459069	Chsy1
ENSMUSG00000030662	8801.16	0.823848	0.231205	3.56328	0.000366254	0.00462802	Ipo5
ENSMUSG00000031367	305.445	1.03014	0.289144	3.56273	0.000367014	0.00463425	Ap1s2
ENSMUSG00000025967	30564	0.804418	0.225871	3.5614	0.000368882	0.00465107	Eef1b2
ENSMUSG00000035399	730.743	1.37259	0.385574	3.55987	0.000371038	0.00467307	Oser1
ENSMUSG00000027012	3439.87	0.845125	0.237445	3.55925	0.000371922	0.00467921	Dync1i2
ENSMUSG00000040435	374.751	0.839701	0.236018	3.55779	0.000373991	0.00469843	Ppp1r15a
ENSMUSG00000068823	8412.36	0.856058	0.240645	3.55734	0.000374624	0.00470298	Csde1
ENSMUSG00000029250	4302.51	0.838669	0.23591	3.55504	0.000377924	0.0047328	Polr2b
ENSMUSG00000037742	206320	1.10548	0.310972	3.55492	0.00037809	0.0047328	Eef1a1
ENSMUSG00000031584	1039.85	1.1605	0.326719	3.55197	0.000382352	0.00477926	Gsr
ENSMUSG00000031864	2145.55	1.04462	0.294389	3.54845	0.000387506	0.00483142	Ints10
ENSMUSG00000059970	110.622	1.24914	0.352072	3.54797	0.000388214	0.00483513	Hspa2
ENSMUSG00000017686	1953.07	1.10728	0.312291	3.54567	0.000391612	0.00487395	Rhot1
ENSMUSG00000074220	115.867	1.36694	0.385686	3.54419	0.000393828	0.00489102	Zfp382
ENSMUSG00000036782	311.402	1.06267	0.300024	3.54195	0.000397186	0.00492567	Klhl13
ENSMUSG00000023456	23030.4	1.2735	0.35972	3.54025	0.000399753	0.00495397	Tpi1
ENSMUSG00000032583	147.637	1.3057	0.369108	3.53744	0.000404021	0.00500329	Mon1a
ENSMUSG00000027649	4296.78	1.01423	0.287023	3.53362	0.000409906	0.0050689	Ctnnbl1
ENSMUSG00000017264	1481.47	1.0168	0.288031	3.53017	0.000415298	0.00511376	Exosc10
ENSMUSG00000041632	1882.56	0.974379	0.275982	3.5306	0.000414626	0.00511376	Mrps27
ENSMUSG00000022221	1066.7	0.92585	0.262356	3.52899	0.000417152	0.00512322	Ripk3
ENSMUSG00000024530	128.624	1.1939	0.338306	3.52906	0.000417045	0.00512322	Prelid3a
ENSMUSG00000052396	2747.8	0.781493	0.221494	3.52829	0.000418257	0.005132	Mogat2
ENSMUSG00000020929	3164.51	0.916338	0.25978	3.52737	0.000419716	0.00513901	Eftud2
ENSMUSG00000021486	5772.87	1.03964	0.294715	3.52762	0.000419317	0.00513901	Prelid1
ENSMUSG00000024975	1865.98	0.879681	0.249385	3.5274	0.000419669	0.00513901	Pdcd4
ENSMUSG00000026678	21.6463	2.32165	0.658263	3.52694	0.000420396	0.0051437	Rgs5
ENSMUSG00000033953	824.364	1.12507	0.319147	3.52525	0.000423085	0.00516931	Ppp3r1
ENSMUSG00000024151	2375.65	0.926599	0.262873	3.52488	0.000423667	0.00517279	Msh2
ENSMUSG00000025423	1829.19	0.882259	0.250448	3.52273	0.000427127	0.00519676	Pias2
ENSMUSG00000029466	1240.91	0.817774	0.232211	3.52168	0.000428818	0.00521368	Anapc7
ENSMUSG00000032096	3750.45	0.934369	0.265414	3.52041	0.000430874	0.00523502	Arcn1
ENSMUSG00000056214	1408.42	0.861773	0.245087	3.51619	0.000437782	0.00531151	Pard6g
ENSMUSG00000027634	1757.56	0.968924	0.275701	3.5144	0.00044075	0.00534005	Ndrg3
ENSMUSG00000029171	1247.32	0.95266	0.27112	3.5138	0.000441753	0.00534307	Pgm2
ENSMUSG00000020897	3737.96	1.0433	0.297259	3.50974	0.00044854	0.00539872	Aurkb
ENSMUSG00000067219	61.1035	1.68466	0.480071	3.50918	0.000449484	0.00540112	Nipal1
ENSMUSG00000079311	25.7173	1.98031	0.564325	3.50916	0.000449523	0.00540112	Gm3222
ENSMUSG00000058886	465.469	0.929208	0.264837	3.5086	0.000450477	0.00540884	Deaf1
ENSMUSG00000003808	1847.1	0.936258	0.266867	3.50833	0.000450936	0.00541061	Farsa
ENSMUSG00000061802	14.0286	2.71171	0.773342	3.50648	0.000454074	0.0054295	Armc4
ENSMUSG00000070372	1237.89	1.27661	0.364126	3.50595	0.000454978	0.00543366	Capza1
ENSMUSG00000041974	662.403	0.917932	0.261824	3.50591	0.000455048	0.00543366	Spidr
ENSMUSG00000037613	18.912	2.72789	0.778533	3.50388	0.000458534	0.00547153	Tnfrsf23
ENSMUSG00000074978	22.2068	2.1294	0.608094	3.50176	0.000462192	0.00550382	Actg-ps1
ENSMUSG00000031353	14428.4	1.05363	0.301008	3.50034	0.000464671	0.00552955	Rbbp7
ENSMUSG00000037443	911.207	0.782709	0.22382	3.49704	0.000470454	0.00558306	Cep85
ENSMUSG00000033847	80.5869	1.59676	0.456935	3.49451	0.000474927	0.00561417	Pla2g4c
ENSMUSG00000020372	39742.9	0.786056	0.224955	3.49428	0.000475338	0.00561417	Rack1
ENSMUSG00000071644	32481.8	1.01468	0.290452	3.49345	0.000476829	0.00562412	Eef1g
ENSMUSG00000003282	317.843	0.960174	0.274951	3.49217	0.000479119	0.00563963	Plag1
ENSMUSG00000045730	314.708	1.4193	0.406616	3.49052	0.000482073	0.00566672	Adrb2
ENSMUSG00000092203	6081.54	0.93765	0.268771	3.48866	0.000485447	0.00569097	1110038B12Rik
ENSMUSG00000116825	65.4726	1.42012	0.407155	3.4879	0.000486836	0.00569835	Rps2-ps7
ENSMUSG00000024791	2823.35	1.11724	0.320565	3.48521	0.000491759	0.0057417	Cdca5
ENSMUSG00000026701	18714.8	1.00921	0.289703	3.48359	0.000494735	0.00577257	Prdx6
ENSMUSG00000028577	3453.19	0.976032	0.280255	3.48266	0.000496465	0.00578887	Plaa
ENSMUSG00000090610	51.9714	1.73747	0.499225	3.48033	0.000500803	0.00582433	Gm3571
ENSMUSG00000039536	1371.39	0.816303	0.234565	3.48008	0.000501266	0.00582529	Stau1
ENSMUSG00000091639	71.9707	1.33579	0.384101	3.47771	0.000505725	0.00586391	Gm3756
ENSMUSG00000110404	43.9351	1.71403	0.492968	3.47696	0.000507125	0.00587111	Rnf223
ENSMUSG00000061119	821.51	0.843711	0.242942	3.47289	0.000514885	0.00593983	Prcp
ENSMUSG00000004451	1322.28	0.891962	0.256977	3.47099	0.00051855	0.00597021	Ralb
ENSMUSG00000039701	264.058	1.10319	0.318129	3.46774	0.000524849	0.00602674	Usp53
ENSMUSG00000048109	735.678	0.861619	0.248552	3.46656	0.000527168	0.00604537	Rbm15
ENSMUSG00000060475	2768.17	1.14881	0.331418	3.46634	0.000527595	0.00604628	Wtap
ENSMUSG00000020250	2222.45	0.740464	0.21373	3.46448	0.000531255	0.00607218	Txnrd1
ENSMUSG00000073633	135.221	1.16946	0.337633	3.4637	0.00053281	0.00608595	Fbxo36
ENSMUSG00000008690	2301.83	0.918301	0.265148	3.46336	0.000533483	0.0060871	Ncaph2
ENSMUSG00000004730	35.5337	1.79907	0.519468	3.46329	0.000533612	0.0060871	Adgre1
ENSMUSG00000032512	1098.08	0.85696	0.247643	3.46047	0.00053923	0.00614715	Wdr48
ENSMUSG00000020496	3965.63	0.892215	0.25822	3.45525	0.000549782	0.00624285	Rnf187
ENSMUSG00000026238	33100.7	0.818057	0.236793	3.45474	0.000550821	0.00624647	Ptma
ENSMUSG00000002835	577.117	0.788103	0.228138	3.4545	0.000551305	0.00624788	Chaf1a
ENSMUSG00000041886	39.334	1.80021	0.521647	3.45101	0.0005585	0.00632117	Macc1
ENSMUSG00000032097	2757.08	0.890501	0.258083	3.45045	0.000559653	0.00632598	Ddx6
ENSMUSG00000021364	368.618	0.965397	0.280031	3.44746	0.000565879	0.00638388	Elovl2
ENSMUSG00000031482	324.838	0.944952	0.274152	3.44682	0.000567235	0.00639502	Slc25a15
ENSMUSG00000057244	104.378	1.19565	0.347039	3.44528	0.000570462	0.00642723	Gm6139
ENSMUSG00000084349	5906.02	1.09839	0.319015	3.44307	0.000575159	0.00646756	Rpl3-ps1
ENSMUSG00000024835	764.939	1.32895	0.386554	3.43794	0.000586166	0.00656158	Coro1b
ENSMUSG00000057315	359.992	0.969712	0.282135	3.43705	0.000588085	0.00657459	Arhgap24
ENSMUSG00000031633	22351.9	0.928562	0.270159	3.43709	0.000588001	0.00657459	Slc25a4
ENSMUSG00000037161	138.905	1.19485	0.347782	3.43564	0.000591157	0.00659618	Mgarp
ENSMUSG00000029447	19847.4	0.803129	0.233869	3.4341	0.00059453	0.00662956	Cct6a
ENSMUSG00000056228	296.262	1.0753	0.313198	3.43329	0.000596296	0.0066343	Cars2
ENSMUSG00000006134	1083.91	0.733243	0.213574	3.43321	0.000596484	0.0066343	Crkl
ENSMUSG00000005973	3190.77	0.862297	0.251242	3.43214	0.000598845	0.00665205	Rcn1
ENSMUSG00000041126	22818	0.746647	0.217821	3.4278	0.000608499	0.00674411	H2az2
ENSMUSG00000043419	808.056	1.14563	0.334486	3.42504	0.000614708	0.00679348	Rnf227
ENSMUSG00000074340	66.488	1.46794	0.428854	3.42293	0.00061949	0.00682894	Ovgp1
ENSMUSG00000099891	14.4351	2.51699	0.735616	3.42162	0.000622502	0.00685779	Gm5575
ENSMUSG00000098713	30.4302	1.7293	0.505681	3.41974	0.000626816	0.00689219	Rps2-ps5
ENSMUSG00000035840	436.631	1.23523	0.361192	3.41988	0.000626492	0.00689219	Lysmd3
ENSMUSG00000049225	260.981	1.20479	0.352469	3.41813	0.00063052	0.00692415	Pdp1
ENSMUSG00000021379	78.9762	1.31735	0.385456	3.41765	0.000631649	0.00693217	Id4
ENSMUSG00000032727	603.333	0.833337	0.243847	3.41746	0.000632084	0.00693256	Mier3
ENSMUSG00000027642	8078.78	0.799303	0.233923	3.41694	0.000633283	0.00694132	Rpn2
ENSMUSG00000025609	3732.8	0.971957	0.284515	3.41619	0.000635051	0.00695631	Mkln1
ENSMUSG00000096959	37.8514	1.92667	0.564162	3.4151	0.000637577	0.00697518	4930509G22Rik
ENSMUSG00000040997	996.317	1.10947	0.324953	3.41425	0.000639578	0.00699267	Abhd4
ENSMUSG00000024454	3483.27	1.04018	0.304777	3.41292	0.000642719	0.00701817	Hdac3
ENSMUSG00000052298	2885.03	0.959753	0.281322	3.41158	0.000645877	0.00704822	Cdc42se2
ENSMUSG00000021037	5250.39	1.05148	0.308379	3.40972	0.000650306	0.00709209	Ahsa1
ENSMUSG00000027227	451.924	1.06424	0.312346	3.40724	0.000656235	0.00714329	Sord
ENSMUSG00000027193	4303.66	0.893712	0.262528	3.40425	0.000663459	0.00721288	Api5
ENSMUSG00000100025	15.3753	2.37654	0.698571	3.40201	0.000668928	0.00726102	Gm8141
ENSMUSG00000039886	895.049	0.922941	0.2713	3.40192	0.000669141	0.00726102	Tmem120a
ENSMUSG00000040205	8.56679	3.66098	1.07694	3.39942	0.000675284	0.00731852	Cuzd1
ENSMUSG00000032316	1264.85	1.02924	0.302837	3.39866	0.000677158	0.00732968	Clk3
ENSMUSG00000068874	250.202	1.12442	0.330887	3.3982	0.000678312	0.0073376	Selenbp1
ENSMUSG00000036655	8.4953	3.62352	1.06699	3.39601	0.000683763	0.00737818	Colec11
ENSMUSG00000040749	1352.45	1.22819	0.361685	3.39575	0.000684415	0.00738063	Siah1b
ENSMUSG00000017561	1715.45	1.0045	0.296004	3.39354	0.000689947	0.00743106	Crlf3
ENSMUSG00000039109	22.2116	1.99404	0.587642	3.39329	0.000690572	0.00743129	F13a1
ENSMUSG00000022876	339.146	1.02637	0.302543	3.39248	0.000692627	0.00744606	Samsn1
ENSMUSG00000118506	30.5307	1.7253	0.508618	3.39213	0.000693522	0.00744647	1700094D03Rik
ENSMUSG00000087412	2321.92	0.702331	0.207045	3.39216	0.000693444	0.00744647	Gm15501
ENSMUSG00000043091	1259.55	1.1223	0.330937	3.39129	0.000695635	0.00745992	Tuba1c
ENSMUSG00000045427	1439.37	1.05161	0.310815	3.38338	0.000715994	0.0076499	Hnrnph2
ENSMUSG00000027479	8702.43	0.902869	0.266872	3.38315	0.000716582	0.00765148	Mapre1
ENSMUSG00000037188	224.348	1.05796	0.312798	3.38226	0.000718933	0.00766714	Grhl3
ENSMUSG00000017421	17693.9	1.04945	0.310341	3.38159	0.000720667	0.00768092	Zfp207
ENSMUSG00000091421	56.0062	1.41132	0.417544	3.38004	0.000724743	0.00771489	Gm4202
ENSMUSG00000022500	2013.74	0.791381	0.234217	3.37884	0.000727936	0.00774413	Litaf
ENSMUSG00000044098	246.951	0.941317	0.278704	3.37748	0.000731529	0.00777381	Rsbn1
ENSMUSG00000074129	4545.51	0.806795	0.238877	3.37745	0.000731621	0.00777381	Rpl13a
ENSMUSG00000002658	2068.35	0.940287	0.278477	3.37654	0.000734036	0.00778994	Gtf2f1
ENSMUSG00000052798	2272.3	0.882213	0.261542	3.37312	0.000743203	0.0078587	Nup107
ENSMUSG00000035678	174.319	0.996981	0.295596	3.37278	0.000744137	0.0078587	Tnfsf9
ENSMUSG00000025340	435.978	0.907837	0.269286	3.37127	0.000748229	0.00789232	Rabgef1
ENSMUSG00000067224	43.8311	1.50888	0.44755	3.37143	0.000747789	0.00789232	Gm3695
ENSMUSG00000109324	574.473	0.846472	0.251327	3.36802	0.000757113	0.00797633	Prmt1
ENSMUSG00000074001	8.98469	4.77588	1.41933	3.36488	0.000765778	0.00804808	Klhl40
ENSMUSG00000078566	665.579	1.20236	0.357506	3.3632	0.000770448	0.00808249	Bnip3
ENSMUSG00000034616	33.5862	1.64513	0.489422	3.36137	0.000775582	0.00812653	Ssh3
ENSMUSG00000027744	12.5374	3.20598	0.954808	3.35772	0.000785874	0.00821454	Stoml3
ENSMUSG00000086598	18.5997	2.05776	0.612991	3.35692	0.000788172	0.00821845	Btbd18
ENSMUSG00000029145	1913.31	0.836288	0.249134	3.35677	0.000788578	0.00821845	Eif2b4
ENSMUSG00000036376	1734.32	1.02883	0.306457	3.35718	0.000787405	0.00821845	Abt1
ENSMUSG00000054893	318.491	0.808721	0.241035	3.3552	0.000793072	0.00825498	Zfp667
ENSMUSG00000029517	9.24023	3.76856	1.12383	3.3533	0.000798532	0.00829698	Ankrd7
ENSMUSG00000015452	35.4945	1.60285	0.478377	3.35061	0.000806349	0.00834316	Ager
ENSMUSG00000027456	87.0428	1.55886	0.46532	3.35008	0.000807876	0.00835398	Sdcbp2
ENSMUSG00000042349	34.1355	1.72539	0.515074	3.3498	0.000808701	0.00835754	Ikbke
ENSMUSG00000098008	18.272	2.0914	0.625057	3.34594	0.000820041	0.00845963	A930001A20Rik
ENSMUSG00000032417	175.928	1.02242	0.30566	3.34497	0.000822919	0.00848427	Rwdd2a
ENSMUSG00000042567	37.9637	1.8259	0.546335	3.34209	0.000831488	0.0085523	Nek10
ENSMUSG00000020115	620.351	1.02912	0.308083	3.34041	0.000836554	0.00859932	Tbk1
ENSMUSG00000021177	1218.71	0.95675	0.286465	3.33985	0.000838229	0.00860635	Tdp1
ENSMUSG00000028986	1076.87	0.977977	0.292848	3.33954	0.000839174	0.00860898	Klhl7
ENSMUSG00000035198	1911.96	1.09139	0.326835	3.33928	0.000839973	0.00860898	Tubg1
ENSMUSG00000027678	627.27	0.753679	0.225724	3.33895	0.000840971	0.00861412	Ncoa3
ENSMUSG00000022419	174.768	1.23447	0.36974	3.33874	0.000841581	0.00861529	Deptor
ENSMUSG00000021678	20.6292	2.36224	0.707798	3.33744	0.00084553	0.00864337	F2rl1
ENSMUSG00000022200	1304.05	0.867849	0.260085	3.33679	0.000847522	0.00865061	Golph3
ENSMUSG00000040282	193.482	1.03994	0.311868	3.33456	0.000854345	0.00871001	Cdin1
ENSMUSG00000025059	219.616	1.3149	0.39444	3.3336	0.000857311	0.00873185	Gk
ENSMUSG00000044792	1351.1	0.97992	0.293958	3.33354	0.000857494	0.00873185	Isca1
ENSMUSG00000022176	86.0844	1.36234	0.40932	3.32831	0.000873738	0.00885184	Rem2
ENSMUSG00000032648	28.8994	2.0541	0.617167	3.32827	0.000873866	0.00885184	Pygm
ENSMUSG00000028911	198.294	1.00989	0.303488	3.32762	0.00087591	0.00886738	Srsf4
ENSMUSG00000025147	1655.85	0.936817	0.281545	3.32742	0.000876548	0.00886866	Mob2
ENSMUSG00000019577	12.2651	2.71697	0.817925	3.32178	0.000894439	0.00900247	Pdk4
ENSMUSG00000024750	1335.77	0.882831	0.265864	3.32061	0.000898208	0.00902771	Zfand5
ENSMUSG00000049517	40318.5	0.691465	0.208257	3.32025	0.000899361	0.00903107	Rps23
ENSMUSG00000029998	737.755	0.730113	0.219954	3.31939	0.000902145	0.00905329	Pcyox1
ENSMUSG00000000028	4589.31	1.02042	0.307425	3.31924	0.000902618	0.00905329	Cdc45
ENSMUSG00000005981	2014.92	0.874546	0.263965	3.31311	0.000922648	0.00920425	Trap1
ENSMUSG00000110275	396.028	0.790748	0.238876	3.31029	0.000931986	0.00927817	Gm5905
ENSMUSG00000002944	22.0056	2.12695	0.642969	3.30801	0.000939622	0.00934348	Cd36
ENSMUSG00000029455	289.526	0.904347	0.273603	3.30533	0.000948637	0.00940082	Aldh2
ENSMUSG00000004934	247.351	0.865903	0.262033	3.30455	0.000951285	0.00942168	Pias4
ENSMUSG00000059743	175.663	1.13317	0.342939	3.30429	0.000952162	0.00942499	Fdps
ENSMUSG00000058440	1157.89	0.772828	0.233931	3.30366	0.00095432	0.00943559	Nrf1
ENSMUSG00000003527	783.662	0.940104	0.285001	3.29859	0.000971704	0.0095802	Ess2
ENSMUSG00000029283	729.845	0.880848	0.267189	3.29673	0.00097819	0.0096332	Cdc7
ENSMUSG00000021395	1623.78	0.794684	0.241144	3.29548	0.00098254	0.0096596	Spin1
ENSMUSG00000022757	3847.25	1.07068	0.324923	3.2952	0.000983522	0.00966378	Tfg
ENSMUSG00000014077	1867.41	1.13735	0.34591	3.28799	0.00100905	0.00988662	Chp1
ENSMUSG00000026637	11.6661	2.7395	0.833409	3.2871	0.00101225	0.00990683	Traf5
ENSMUSG00000022312	14262.5	0.976184	0.297038	3.2864	0.00101479	0.00992603	Eif3h
ENSMUSG00000002985	898.692	1.09497	0.333267	3.28556	0.0010178	0.0099499	Apoe
ENSMUSG00000001909	939.252	0.940679	0.286363	3.28492	0.00102013	0.00996708	Trmt1
