# Supplementary material for: Glycolytic flux-signaling controls mouse embryo mesoderm development
Source: eLife. 2022 Dec 5;11:e83299. doi: 10.7554/eLife.83299 (PMC9771359; doi:10.7554/eLife.83299)
Supplement: Supplementary file 4. [file elife-83299-supp4.xlsx]

## Sheet: GOTerm_FBP_Up
GO-terms that were enriched in up-regulated DEGs in FBP-treated explants
Term	Description	Count	FDR
GO:0007049	cell cycle	61	4.78e-08
GO:0006606	protein import into nucleus	19	6.03e-05
GO:0016126	sterol biosynthetic process	11	6.03e-05
GO:0006096	glycolytic process	11	0.000418
GO:0006695	cholesterol biosynthetic process	11	0.000708
GO:0043407	negative regulation of MAP kinase activity	12	0.000708
GO:0051301	cell division	35	0.00110584
GO:0061077	chaperone-mediated protein folding	10	0.00206723
GO:1904851	positive regulation of establishment of protein localization to telomere	6	0.00501579
GO:0070301	cellular response to hydrogen peroxide	13	0.00623738
GO:0006270	DNA replication initiation	8	0.0065043
GO:0070372	regulation of ERK1 and ERK2 cascade	9	0.00959339
GO:0000727	double-strand break repair via break-induced replication	6	0.0102806
GO:0007623	circadian rhythm	14	0.0105319
GO:0000278	mitotic cell cycle	16	0.012849
GO:0007017	microtubule-based process	9	0.0129385
GO:0046034	ATP metabolic process	10	0.0129385
GO:0051726	regulation of cell cycle	26	0.0185614
GO:0006260	DNA replication	15	0.0224261
GO:0006457	protein folding	14	0.0352488
GO:0010976	positive regulation of neuron projection development	18	0.0352488
GO:0005975	carbohydrate metabolic process	20	0.0352488
GO:0008299	isoprenoid biosynthetic process	6	0.0391201
GO:0050821	protein stabilization	19	0.0408063
GO:0008203	cholesterol metabolic process	14	0.0408063
GO:0043161	proteasome-mediated ubiquitin-dependent protein catabolic process	19	0.0487604
GO:0008380	RNA splicing	23	0.0487604

## Sheet: GOTerm_FBP_Down
GO-terms that were enriched in down-regulated DEGs in FBP-treated explants
Term	Description	Count	FDR
GO:0007275	multicellular organism development	81	1.56e-07
GO:0001569	branching involved in blood vessel morphogenesis	14	7.17e-07
GO:0000122	negative regulation of transcription from RNA polymerase II promoter	68	1.81e-05
GO:0006357	regulation of transcription from RNA polymerase II promoter	96	1.81e-05
GO:0001525	angiogenesis	29	0.000173
GO:0009952	anterior/posterior pattern specification	17	0.00294105
GO:0043524	negative regulation of neuron apoptotic process	20	0.00772741
