# Supplementary material for: Glycolytic flux-signaling controls mouse embryo mesoderm development
Source: eLife. 2022 Dec 5;11:e83299. doi: 10.7554/eLife.83299 (PMC9771359; doi:10.7554/eLife.83299)
Supplement: Supplementary file 5. [file elife-83299-supp5.xlsx]

## Sheet: DEGs_F6P_DOWN_p0.01
row	baseMean	log2FoldChange	lfcSE	stat	pvalue	padj	symbol
ENSMUSG00000055150	194.662	-3.71733	0.404772	-9.18376	4.16314e-20	6.31964e-16	Zfp78
ENSMUSG00000101089	115.366	-2.67622	0.389407	-6.87254	6.30701e-12	2.39351e-08	2610016A17Rik
ENSMUSG00000089889	166.277	-2.54929	0.380722	-6.69593	2.14311e-11	6.50649e-08	0610040B10Rik
ENSMUSG00000000489	202.993	-2.46897	0.383756	-6.43368	1.24552e-10	2.70099e-07	Pdgfb
ENSMUSG00000051319	718.376	-2.04334	0.32177	-6.3503	2.14897e-10	4.07767e-07	Mtln
ENSMUSG00000040883	513.138	-1.64319	0.264523	-6.2119	5.23468e-10	8.82917e-07	Tmem205
ENSMUSG00000048065	159.031	-2.54241	0.416705	-6.10122	1.05263e-09	1.33158e-06	Cyb5r2
ENSMUSG00000024295	95.0203	-2.30527	0.380759	-6.05442	1.40929e-09	1.64561e-06	Cyp4f41-ps
ENSMUSG00000098332	583.844	-1.62432	0.272176	-5.96789	2.40342e-09	2.43226e-06	Pigbos1
ENSMUSG00000036214	149.816	-1.95864	0.33303	-5.88127	4.07128e-09	3.86263e-06	Znrd1as
ENSMUSG00000085016	38.6418	-3.12607	0.537099	-5.82029	5.87473e-09	4.95436e-06	Gm11335
ENSMUSG00000025381	9335.96	-1.50415	0.259504	-5.79625	6.78124e-09	5.14696e-06	Cnpy2
ENSMUSG00000044881	480.492	-1.55713	0.272458	-5.71511	1.09631e-08	7.56455e-06	Coa4
ENSMUSG00000028295	1023.08	-1.40149	0.246977	-5.67457	1.39036e-08	8.44224e-06	Smim8
ENSMUSG00000062944	142.376	-2.13838	0.384857	-5.5563	2.75553e-08	1.3943e-05	9130023H24Rik
ENSMUSG00000117322	64.5657	-2.21934	0.405927	-5.46734	4.56849e-08	2.1015e-05	6330415G19Rik
ENSMUSG00000010607	667.544	-1.40685	0.257667	-5.45994	4.76297e-08	2.12653e-05	Pigyl
ENSMUSG00000074398	63.0627	-2.11103	0.389265	-5.42312	5.85681e-08	2.46962e-05	Gm15441
ENSMUSG00000035352	28.1527	-3.86912	0.719291	-5.37907	7.48717e-08	3.06433e-05	Ccl12
ENSMUSG00000062753	129.522	-1.69018	0.31478	-5.36941	7.89967e-08	3.0748e-05	AI413582
ENSMUSG00000066637	508.625	-1.31851	0.246424	-5.35056	8.76817e-08	3.32752e-05	Ttc32
ENSMUSG00000028838	69.4981	-2.35495	0.440939	-5.34076	9.25564e-08	3.34525e-05	Extl1
ENSMUSG00000062619	676.742	-1.37147	0.259681	-5.28137	1.28219e-07	4.14119e-05	2310039H08Rik
ENSMUSG00000036850	3378.64	-1.33446	0.253604	-5.26199	1.42503e-07	4.50666e-05	Mrpl41
ENSMUSG00000085175	125.723	-1.80243	0.343723	-5.24384	1.57266e-07	4.87205e-05	Gm11423
ENSMUSG00000056498	27.9879	-3.08955	0.594755	-5.19467	2.05082e-07	5.98683e-05	Tmem154
ENSMUSG00000026497	233.7	-1.75328	0.339931	-5.15774	2.49953e-07	7.02645e-05	Mixl1
ENSMUSG00000022701	697.396	-1.36827	0.268056	-5.10441	3.31828e-07	8.72293e-05	Ccdc191
ENSMUSG00000042659	863.969	-1.52475	0.300436	-5.07512	3.87261e-07	9.70514e-05	Arrdc4
ENSMUSG00000021094	142.576	-1.80929	0.356597	-5.07378	3.89996e-07	9.70514e-05	Dhrs7
ENSMUSG00000040345	117.397	-1.60399	0.316327	-5.07067	3.96421e-07	9.70591e-05	Arhgap9
ENSMUSG00000045854	950.006	-1.16145	0.233382	-4.97658	6.47163e-07	0.000151137	Lyrm2
ENSMUSG00000118346	1752.41	-1.46842	0.296588	-4.95104	7.38193e-07	0.00016725	Tmem179b
ENSMUSG00000039461	204.418	-1.56102	0.315701	-4.94462	7.62913e-07	0.000170309	Tcta
ENSMUSG00000021680	226.778	-1.86443	0.378565	-4.925	8.43607e-07	0.000185593	Crhbp
ENSMUSG00000036120	304.31	-1.51786	0.308958	-4.91284	8.97653e-07	0.000189255	Rfxank
ENSMUSG00000046380	74.0047	-2.6402	0.537151	-4.9152	8.86925e-07	0.000189255	Jrk
ENSMUSG00000031901	210.023	-1.65269	0.337968	-4.89007	1.00803e-06	0.000209614	Dus2
ENSMUSG00000097195	8121.36	-1.37999	0.282574	-4.88364	1.04143e-06	0.000213634	Snhg5
ENSMUSG00000085696	2689.74	-1.32719	0.273411	-4.85418	1.20888e-06	0.000244677	Hoxaas3
ENSMUSG00000034379	123.175	-2.26671	0.467276	-4.85089	1.22909e-06	0.000245495	Wdr5b
ENSMUSG00000065952	324.863	-1.44775	0.298933	-4.84304	1.27865e-06	0.000248844	Rps23rg1
ENSMUSG00000031641	907.331	-1.30685	0.269799	-4.84378	1.27395e-06	0.000248844	Cbr4
ENSMUSG00000039474	57.209	-2.04981	0.424593	-4.82769	1.38124e-06	0.000265408	Wfs1
ENSMUSG00000001918	621.064	-1.26652	0.264081	-4.79594	1.6191e-06	0.000299731	Slc1a5
ENSMUSG00000007777	3182.63	-1.40241	0.294051	-4.76928	1.84886e-06	0.000334115	0610009B22Rik
ENSMUSG00000051074	61.0307	-2.09131	0.439009	-4.76371	1.90067e-06	0.000339437	4930579K19Rik
ENSMUSG00000039670	249.924	-1.82576	0.384467	-4.74882	2.0461e-06	0.000357009	Oxld1
ENSMUSG00000086126	1637.96	-1.63479	0.345171	-4.73617	2.1779e-06	0.000371466	Evx1os
ENSMUSG00000032673	874.127	-1.35427	0.286328	-4.72978	2.24765e-06	0.000379104	Prorsd1
ENSMUSG00000032121	533.611	-1.49392	0.320378	-4.66298	3.11667e-06	0.000482765	Tmem218
ENSMUSG00000036327	301.056	-1.55243	0.334074	-4.64695	3.36881e-06	0.000511386	Qsox2
ENSMUSG00000117924	2737.46	-1.04813	0.226109	-4.63551	3.5605e-06	0.000529886	Tmem223
ENSMUSG00000048581	57.0515	-2.31598	0.500118	-4.63086	3.64156e-06	0.000536688	E130311K13Rik
ENSMUSG00000043831	75.784	-1.68217	0.368982	-4.55895	5.14107e-06	0.000702569	Lysmd4
ENSMUSG00000040452	45.9308	-2.54317	0.558054	-4.55721	5.18365e-06	0.000702569	Cdh12
ENSMUSG00000034744	190.132	-1.48875	0.328837	-4.52732	5.97375e-06	0.000788536	Nagk
ENSMUSG00000059142	432.822	-1.69462	0.374849	-4.52081	6.16026e-06	0.000806145	Zfp945
ENSMUSG00000005078	1091.23	-1.19832	0.26529	-4.51702	6.27163e-06	0.000813704	Jkamp
ENSMUSG00000022833	355.923	-1.25912	0.279753	-4.50083	6.76873e-06	0.000856245	Ccdc14
ENSMUSG00000028470	1685.54	-1.22302	0.272129	-4.49427	6.98093e-06	0.00087579	Hint2
ENSMUSG00000029923	283.54	-1.48501	0.330555	-4.49249	7.03957e-06	0.000875907	Rab19
ENSMUSG00000032305	209.146	-1.25196	0.279211	-4.48393	7.32806e-06	0.000897096	Fam219b
ENSMUSG00000030879	4602.27	-1.00938	0.2261	-4.46433	8.03199e-06	0.000952544	Mrpl17
ENSMUSG00000040795	244.167	-1.37056	0.307243	-4.46082	8.16449e-06	0.000955503	Iqcc
ENSMUSG00000051169	161.207	-1.43597	0.322778	-4.44878	8.63595e-06	0.000985667	Rpusd3
ENSMUSG00000004612	60.9276	-1.93767	0.435449	-4.44982	8.59414e-06	0.000985667	Nkg7
ENSMUSG00000042404	69.9725	-1.84557	0.416334	-4.43289	9.29766e-06	0.00104547	Dennd4b
ENSMUSG00000008540	5789.44	-1.45443	0.328353	-4.42948	9.44618e-06	0.00104885	Mgst1
ENSMUSG00000024055	46.6645	-2.15921	0.487514	-4.42903	9.46592e-06	0.00104885	Cyp4f13
ENSMUSG00000029993	1638.75	-1.18284	0.267373	-4.42393	9.69202e-06	0.00105652	Nfu1
ENSMUSG00000073940	384.552	-1.37155	0.310111	-4.42278	9.74396e-06	0.00105652	Hbb-bt
ENSMUSG00000085980	90.2708	-1.70212	0.385987	-4.4098	1.03467e-05	0.00110608	Gm12408
ENSMUSG00000025898	1264.76	-1.26287	0.286535	-4.40739	1.04624e-05	0.00111062	Cwf19l2
ENSMUSG00000061461	1758.29	-1.0841	0.246124	-4.4047	1.05932e-05	0.0011167	Smim20
ENSMUSG00000022321	99.4968	-1.70268	0.389433	-4.37219	1.23004e-05	0.00125315	Cdh10
ENSMUSG00000036975	130.952	-1.41696	0.324393	-4.36804	1.25368e-05	0.00126872	Tmem177
ENSMUSG00000070284	71.0036	-1.8913	0.434362	-4.35419	1.33559e-05	0.00133384	Gmppb
ENSMUSG00000031026	108.721	-1.88832	0.435479	-4.33619	1.44976e-05	0.00140907	Trim66
ENSMUSG00000086158	657.946	-1.28258	0.295958	-4.33364	1.46662e-05	0.00140907	Ccpg1os
ENSMUSG00000020599	183.484	-1.22935	0.283587	-4.33501	1.45752e-05	0.00140907	Rgs9
ENSMUSG00000030218	136.116	-1.45917	0.338048	-4.31646	1.58551e-05	0.00150425	Mgp
ENSMUSG00000063894	292.609	-1.50393	0.349111	-4.30789	1.64823e-05	0.00155092	Zkscan8
ENSMUSG00000023284	148.793	-1.95561	0.454556	-4.30224	1.69084e-05	0.00156506	Zfp605
ENSMUSG00000051444	250.637	-1.57191	0.366128	-4.29333	1.76011e-05	0.0016193	Bbs12
ENSMUSG00000051705	219.576	-1.51242	0.352784	-4.2871	1.81024e-05	0.00165539	Senp8
ENSMUSG00000024352	148.896	-1.31951	0.308116	-4.28253	1.84781e-05	0.00167962	Spata24
ENSMUSG00000085282	22.6841	-3.04136	0.710628	-4.27982	1.87045e-05	0.00168249	Gm15663
ENSMUSG00000061313	629.229	-1.05879	0.24741	-4.2795	1.87313e-05	0.00168249	Ddhd2
ENSMUSG00000009145	334.276	-1.63759	0.383053	-4.2751	1.91051e-05	0.00169599	Dqx1
ENSMUSG00000038510	3505.44	-1.09876	0.257141	-4.27297	1.92891e-05	0.00170237	Rpf2
ENSMUSG00000031534	228.498	-1.42076	0.334623	-4.24586	2.1776e-05	0.00187818	Smim19
ENSMUSG00000072663	27.9311	-2.28754	0.539259	-4.24202	2.21522e-05	0.00189983	Spef2
ENSMUSG00000030669	76.47	-1.64495	0.388333	-4.23593	2.27611e-05	0.00191952	Calca
ENSMUSG00000055900	225.911	-1.32576	0.313332	-4.23115	2.32502e-05	0.00192019	Tmem69
ENSMUSG00000048330	180.14	-1.43079	0.338299	-4.22937	2.34348e-05	0.00192019	Ric3
ENSMUSG00000046909	1326.76	-1.20052	0.283817	-4.22991	2.33784e-05	0.00192019	Tefm
ENSMUSG00000085912	32.233	-2.33404	0.551537	-4.23188	2.31746e-05	0.00192019	Trp53cor1
ENSMUSG00000062376	1096.89	-0.975246	0.230638	-4.22848	2.3528e-05	0.00192019	Borcs7
ENSMUSG00000021716	1542.82	-1.11854	0.264722	-4.22536	2.38558e-05	0.00193653	Srek1ip1
ENSMUSG00000031453	283.811	-1.1952	0.283054	-4.2225	2.41605e-05	0.00195083	Rasa3
ENSMUSG00000050212	957.296	-1.04715	0.24859	-4.21236	2.5272e-05	0.00202978	Eva1b
ENSMUSG00000091811	187.539	-1.32376	0.316352	-4.18446	2.8585e-05	0.00227183	Inafm1
ENSMUSG00000096935	46.1467	-1.86116	0.445893	-4.174	2.99294e-05	0.0023663	1700113A16Rik
ENSMUSG00000053030	374.216	-1.27729	0.306316	-4.16984	3.04817e-05	0.00238511	Spink2
ENSMUSG00000034968	172.187	-1.36534	0.327342	-4.17098	3.03291e-05	0.00238511	Lbx2
ENSMUSG00000092607	1198.3	-1.00237	0.241026	-4.15876	3.19985e-05	0.00246567	Scnm1
ENSMUSG00000001018	874.009	-1.47198	0.355234	-4.1437	3.41745e-05	0.00259385	Snapin
ENSMUSG00000002617	73.5096	-1.62298	0.392086	-4.13935	3.48284e-05	0.00263032	Zfp40
ENSMUSG00000036632	1811.86	-1.12935	0.273037	-4.13627	3.52996e-05	0.00265271	Alg5
ENSMUSG00000040370	621.238	-1.15626	0.279747	-4.13322	3.57709e-05	0.00266178	Etfrf1
ENSMUSG00000045316	459.351	-1.43568	0.34827	-4.12231	3.75097e-05	0.00277755	Fahd1
ENSMUSG00000062691	749.989	-1.1254	0.273087	-4.12104	3.77172e-05	0.00277935	Cebpzos
ENSMUSG00000078201	178.643	-1.36725	0.33317	-4.10376	4.0649e-05	0.00292442	Tmem203
ENSMUSG00000021928	1381.49	-1.16561	0.285011	-4.08971	4.31915e-05	0.00304952	Ebpl
ENSMUSG00000030785	16.5512	-3.40191	0.832068	-4.0885	4.34174e-05	0.00305128	Cox6a2
ENSMUSG00000097519	67.3442	-1.54397	0.379283	-4.07075	4.68613e-05	0.00317569	4930558J18Rik
ENSMUSG00000035759	169.181	-1.3762	0.338365	-4.06722	4.75783e-05	0.00319575	Bbs10
ENSMUSG00000030615	3068.72	-1.04702	0.257722	-4.06261	4.85264e-05	0.00324507	Tmem126a
ENSMUSG00000097121	125.675	-1.37321	0.338265	-4.05955	4.91672e-05	0.00325921	D130020L05Rik
ENSMUSG00000020956	648.564	-1.48379	0.36565	-4.05797	4.95021e-05	0.00326714	Dtd2
ENSMUSG00000040010	548.28	-1.41712	0.349824	-4.05096	5.1008e-05	0.00335196	Slc7a5
ENSMUSG00000025008	61.3223	-1.8133	0.448185	-4.04586	5.21303e-05	0.00341094	Tctn3
ENSMUSG00000050188	883.705	-1.19411	0.295503	-4.04094	5.32366e-05	0.00346837	Lsm10
ENSMUSG00000038418	51.6406	-1.97784	0.489882	-4.03739	5.40497e-05	0.0035063	Egr1
ENSMUSG00000019808	668.548	-1.40578	0.350629	-4.0093	6.08992e-05	0.00386799	Adat2
ENSMUSG00000099481	112.367	-1.60157	0.400675	-3.99717	6.41035e-05	0.0039718	Xndc1
ENSMUSG00000061482	861.278	-1.57507	0.393955	-3.9981	6.38531e-05	0.0039718	H4c4
ENSMUSG00000047656	200.095	-1.16091	0.29025	-3.99971	6.34197e-05	0.0039718	Trpt1
ENSMUSG00000028795	442.31	-1.04362	0.261765	-3.98687	6.69504e-05	0.00409801	Ccdc28b
ENSMUSG00000070737	49.0948	-1.71305	0.430497	-3.97923	6.91385e-05	0.00421495	Tmem35b
ENSMUSG00000072915	136.31	-1.46785	0.369463	-3.97294	7.09916e-05	0.00429344	Gm12258
ENSMUSG00000040841	89.4572	-1.58046	0.397931	-3.97169	7.13643e-05	0.00429885	Six5
ENSMUSG00000032714	265.926	-1.09979	0.277878	-3.95782	7.56379e-05	0.00446764	Syde1
ENSMUSG00000090191	58.7789	-1.61434	0.408196	-3.95481	7.65963e-05	0.00450671	9230105E05Rik
ENSMUSG00000039850	177.323	-1.17685	0.299318	-3.93178	8.43191e-05	0.00483005	Endov
ENSMUSG00000032513	103.939	-1.26595	0.322127	-3.92999	8.49493e-05	0.00483325	Gorasp1
ENSMUSG00000030317	191.662	-1.40519	0.357775	-3.92757	8.58071e-05	0.0048422	Timp4
ENSMUSG00000046516	238.652	-1.29947	0.330801	-3.92825	8.55665e-05	0.0048422	Cox17
ENSMUSG00000026810	2567.93	-0.863246	0.220032	-3.92327	8.73558e-05	0.00491134	Dpm2
ENSMUSG00000017713	20.3134	-2.54333	0.652369	-3.8986	9.67488e-05	0.0052829	Tha1
ENSMUSG00000015468	236.595	-1.25036	0.321376	-3.89064	9.998e-05	0.0053819	Notch4
ENSMUSG00000044681	87.6034	-1.49012	0.383309	-3.88751	0.000101276	0.00543239	Cnpy1
ENSMUSG00000039065	609.155	-1.00466	0.260036	-3.86355	0.000111752	0.00593146	Atpsckmt
ENSMUSG00000111375	51.4095	-1.73508	0.450081	-3.85505	0.000115707	0.00607761	Btbd8
ENSMUSG00000021706	346.979	-1.1085	0.288114	-3.84743	0.000119361	0.00618397	Zfyve16
ENSMUSG00000017188	3020.19	-1.01571	0.264293	-3.84314	0.000121471	0.00627188	Coa3
ENSMUSG00000025197	25.3836	-2.25611	0.589615	-3.82641	0.000130026	0.00666822	Cyp2c23
ENSMUSG00000039485	55.1938	-1.60448	0.419947	-3.82067	0.00013309	0.00677954	Tspyl4
ENSMUSG00000037344	37.4478	-1.90826	0.500605	-3.81191	0.000137895	0.00688565	Slc12a9
ENSMUSG00000032398	1159.44	-0.895985	0.235217	-3.80918	0.000139429	0.00693944	Snapc5
ENSMUSG00000046753	733.126	-1.06368	0.279307	-3.80829	0.000139928	0.00694154	Ccdc66
ENSMUSG00000030423	3238.16	-0.904311	0.237556	-3.80672	0.000140821	0.00696309	Pop4
ENSMUSG00000027575	319.184	-1.0762	0.282854	-3.80477	0.000141935	0.00696381	Arfgap1
ENSMUSG00000054400	583.894	-1.16054	0.30496	-3.80554	0.000141495	0.00696381	Cklf
ENSMUSG00000043190	669.648	-1.31802	0.346813	-3.80039	0.000144471	0.00702906	Rfesd
ENSMUSG00000087519	34.4945	-1.88753	0.497435	-3.79454	0.000147918	0.00710338	AV039307
ENSMUSG00000022940	1483	-1.08107	0.284926	-3.79423	0.000148105	0.00710338	Pigp
ENSMUSG00000043015	172.433	-1.12226	0.29617	-3.78924	0.000151107	0.00719061	Nemp2
ENSMUSG00000100164	114.824	-1.20796	0.318737	-3.78984	0.000150744	0.00719061	2610306M01Rik
ENSMUSG00000020256	450.173	-1.544	0.407711	-3.78698	0.000152486	0.00721488	Aldh1l2
ENSMUSG00000058145	96.9951	-1.5364	0.407694	-3.76852	0.000164218	0.00764315	Adamts17
ENSMUSG00000034463	313.394	-1.35597	0.360134	-3.76519	0.00016642	0.00767859	Scara3
ENSMUSG00000044442	703.735	-0.925632	0.245814	-3.76557	0.000166168	0.00767859	N6amt1
ENSMUSG00000049950	1102.14	-1.08021	0.287481	-3.75751	0.000171611	0.00784655	Rpp38
ENSMUSG00000027341	710.652	-1.38517	0.368968	-3.75417	0.00017392	0.00792824	Tmem230
ENSMUSG00000000194	430.736	-0.945753	0.251987	-3.75318	0.000174605	0.00793565	Gpr107
ENSMUSG00000030589	41.7054	-1.79944	0.481221	-3.73932	0.000184517	0.00834271	Rasgrp4
ENSMUSG00000031993	246.453	-1.03644	0.277433	-3.73584	0.000187092	0.00837773	Snx19
ENSMUSG00000083816	77.197	-1.56503	0.419664	-3.72926	0.000192046	0.00849586	Gm13033
ENSMUSG00000106951	42.0685	-2.2173	0.594638	-3.72883	0.000192374	0.00849586	5930430L01Rik
ENSMUSG00000001518	155.313	-1.29152	0.346283	-3.72967	0.000191733	0.00849586	Itfg2
ENSMUSG00000032125	115.915	-1.68519	0.45196	-3.72862	0.000192528	0.00849586	Robo4
ENSMUSG00000046020	245.522	-1.16816	0.314385	-3.7157	0.000202641	0.00878881	Pofut1
ENSMUSG00000029389	443.65	-0.931203	0.25088	-3.71175	0.000205831	0.00890176	Ddx55
ENSMUSG00000031828	17.4132	-2.48408	0.669622	-3.70968	0.000207522	0.00892402	Klhl36
ENSMUSG00000022505	273.704	-1.23217	0.332091	-3.71032	0.000206997	0.00892402	Emp2
ENSMUSG00000001827	21.8658	-2.37448	0.641509	-3.70139	0.000214419	0.00916867	Folr1
ENSMUSG00000031767	361.907	-1.06788	0.288733	-3.6985	0.000216878	0.00922186	Nudt7
ENSMUSG00000020705	1497.68	-0.832159	0.224957	-3.69919	0.000216287	0.00922186	Ddx42
ENSMUSG00000098318	319.785	-1.0576	0.28634	-3.69352	0.000221173	0.00935082	Lockd
ENSMUSG00000042569	1301.55	-0.930198	0.251975	-3.69162	0.00022283	0.00936734	Dhrs7b
ENSMUSG00000042293	511.197	-0.985963	0.267618	-3.68422	0.000229404	0.0094629	Gm5617
ENSMUSG00000022194	368.221	-1.37234	0.373714	-3.67215	0.000240516	0.00984107	Bcl2l2

## Sheet: DEGs_F6P_UP_p0.01
row	baseMean	log2FoldChange	lfcSE	stat	pvalue	padj	symbol
ENSMUSG00000027368	313.924	2.21484	0.287383	7.70695	1.28864e-14	6.5205e-11	Dusp2
ENSMUSG00000031329	79.7214	2.84396	0.440861	6.45092	1.1117e-10	2.70099e-07	Tsx
ENSMUSG00000040128	748.957	1.67625	0.271458	6.17497	6.61749e-10	1.00453e-06	Pnrc1
ENSMUSG00000021701	1399.32	1.43443	0.244655	5.86305	4.54448e-09	4.05795e-06	Plk2
ENSMUSG00000068614	300.46	1.80749	0.311399	5.80444	6.45816e-09	5.14696e-06	Actc1
ENSMUSG00000020407	270.653	2.3075	0.401762	5.74345	9.27685e-09	6.70583e-06	Upp1
ENSMUSG00000093930	2709.46	2.2165	0.388683	5.70259	1.17998e-08	7.78788e-06	Hmgcs1
ENSMUSG00000050503	116.68	2.68798	0.47681	5.63743	1.72603e-08	1.00774e-05	Fbxl22
ENSMUSG00000023092	1533.77	1.64986	0.293715	5.6172	1.94073e-08	1.03459e-05	Fhl1
ENSMUSG00000041261	74.7173	2.2246	0.396074	5.61663	1.94721e-08	1.03459e-05	Car8
ENSMUSG00000015656	35090.7	1.94964	0.355351	5.48651	4.09945e-08	2.00741e-05	Hspa8
ENSMUSG00000041583	31.7632	3.35588	0.624384	5.3747	7.67091e-08	3.06433e-05	Obox6
ENSMUSG00000022351	824.859	1.42881	0.267348	5.34438	9.07272e-08	3.34525e-05	Sqle
ENSMUSG00000003541	131.957	1.89759	0.356892	5.31699	1.05501e-07	3.64988e-05	Ier3
ENSMUSG00000042650	1854.67	1.39639	0.264207	5.28523	1.2555e-07	4.14119e-05	Alkbh5
ENSMUSG00000043807	71.3616	3.0229	0.577193	5.23724	1.62995e-07	4.94853e-05	Ly6g5b
ENSMUSG00000079304	32.4002	3.3605	0.646812	5.19548	2.04187e-07	5.98683e-05	Tex52
ENSMUSG00000031508	3720.59	1.84938	0.358506	5.15857	2.48846e-07	7.02645e-05	Ankrd10
ENSMUSG00000033949	333.926	2.10597	0.410862	5.12573	2.96384e-07	8.1802e-05	Trim36
ENSMUSG00000056962	1676.45	1.41224	0.275904	5.11857	3.07858e-07	8.34516e-05	Jmjd6
ENSMUSG00000031278	529.557	1.27203	0.249243	5.10358	3.33287e-07	8.72293e-05	Acsl4
ENSMUSG00000044244	87.8118	2.23658	0.439235	5.09199	3.54317e-07	9.11616e-05	Il20rb
ENSMUSG00000070385	28.7456	3.49199	0.699376	4.99301	5.94446e-07	0.000140995	Ampd1
ENSMUSG00000000056	437.458	1.7247	0.347656	4.96093	7.01558e-07	0.000161358	Narf
ENSMUSG00000004665	3183.92	1.51184	0.307217	4.92109	8.60652e-07	0.000186639	Cnn2
ENSMUSG00000022464	619.678	1.21672	0.253055	4.80811	1.5236e-06	0.000289101	Slc38a4
ENSMUSG00000022876	438.974	1.47949	0.307866	4.80563	1.54263e-06	0.000289101	Samsn1
ENSMUSG00000073079	141.715	1.40898	0.29491	4.77766	1.77347e-06	0.000324352	Srp54a
ENSMUSG00000030494	545.989	1.7044	0.358694	4.75169	2.01719e-06	0.000356058	Rhpn2
ENSMUSG00000038112	1027.48	1.40874	0.297066	4.74217	2.11439e-06	0.000364732	AW551984
ENSMUSG00000028967	520.24	1.18838	0.251761	4.72027	2.35532e-06	0.000391175	Errfi1
ENSMUSG00000005103	3436.96	1.73201	0.367033	4.71894	2.37076e-06	0.000391175	Wdr1
ENSMUSG00000058258	287.74	1.57875	0.334923	4.71376	2.43193e-06	0.000396953	Idi1
ENSMUSG00000051379	1402.55	1.08879	0.231654	4.70007	2.60076e-06	0.000419995	Flrt3
ENSMUSG00000055531	3703.51	1.24013	0.265235	4.67559	2.93112e-06	0.000468362	Cpsf6
ENSMUSG00000040250	2168.09	1.4528	0.311012	4.6712	2.99441e-06	0.000473491	Ints13
ENSMUSG00000022139	676.812	1.13233	0.242608	4.66731	3.05163e-06	0.000477565	Mbnl2
ENSMUSG00000032294	16798.9	1.42624	0.306461	4.65391	3.25707e-06	0.000499417	Pkm
ENSMUSG00000087370	280.006	1.3671	0.295476	4.62676	3.71424e-06	0.000542136	Tmem170b
ENSMUSG00000050663	35.7104	3.56751	0.77279	4.6164	3.90448e-06	0.000564477	Trhde
ENSMUSG00000045136	254.737	1.66868	0.362706	4.60064	4.21191e-06	0.000603177	Tubb2b
ENSMUSG00000037833	24.3639	3.12803	0.680629	4.59579	4.31108e-06	0.000611609	Sh2d4b
ENSMUSG00000048109	872.582	1.15627	0.252318	4.58257	4.59301e-06	0.000645573	Rbm15
ENSMUSG00000022048	4511.61	1.22782	0.268843	4.56703	4.94685e-06	0.000682665	Dpysl2
ENSMUSG00000047676	14414.2	1.28803	0.28289	4.55311	5.28575e-06	0.000710068	Rpsa-ps10
ENSMUSG00000034457	68.0635	1.69661	0.374458	4.53083	5.87516e-06	0.000782323	Eda2r
ENSMUSG00000093798	22.5503	3.05164	0.676447	4.51127	6.44403e-06	0.000828986	Gm8355
ENSMUSG00000030222	59.34	2.15751	0.478667	4.50733	6.5647e-06	0.000837414	Rerg
ENSMUSG00000025791	273.443	1.75439	0.390748	4.48984	7.12776e-06	0.00087967	Pgm1
ENSMUSG00000004902	53.4682	1.93088	0.431007	4.47992	7.46719e-06	0.000901431	Slc25a18
ENSMUSG00000026950	140.185	1.46877	0.328051	4.47726	7.56061e-06	0.000903701	Neb
ENSMUSG00000029552	1052.76	1.23608	0.277127	4.46034	8.18284e-06	0.000955503	Tes
ENSMUSG00000022200	1609.26	1.24479	0.279728	4.45001	8.58665e-06	0.000985667	Golph3
ENSMUSG00000023043	3001.45	1.48869	0.33518	4.44146	8.93516e-06	0.00101221	Krt18
ENSMUSG00000028128	288.936	1.15417	0.260734	4.42663	9.57181e-06	0.0010529	F3
ENSMUSG00000020572	1580.3	1.21259	0.274715	4.41402	1.01471e-05	0.00109243	Nampt
ENSMUSG00000022812	3862.25	1.16735	0.265777	4.39221	1.12207e-05	0.00117469	Gsk3b
ENSMUSG00000008384	410.426	1.31606	0.300179	4.38425	1.16386e-05	0.00120186	Sertad1
ENSMUSG00000006498	1883.67	1.62661	0.37141	4.37955	1.18925e-05	0.00121978	Ptbp1
ENSMUSG00000021754	664.176	1.2762	0.292396	4.36464	1.27334e-05	0.00128009	Map3k1
ENSMUSG00000027660	2092.63	1.18605	0.272846	4.34698	1.38027e-05	0.00136944	Skil
ENSMUSG00000005483	1398.66	1.38007	0.31763	4.3449	1.39341e-05	0.00137351	Dnajb1
ENSMUSG00000031604	1910.26	1.41057	0.325326	4.33587	1.45188e-05	0.00140907	Msmo1
ENSMUSG00000036699	108.548	1.84084	0.425573	4.32555	1.52151e-05	0.00145261	Zcchc12
ENSMUSG00000022860	160.56	1.54577	0.3589	4.30696	1.65513e-05	0.00155092	Chodl
ENSMUSG00000059486	1056.34	1.17233	0.274057	4.27768	1.88853e-05	0.00168635	Kbtbd2
ENSMUSG00000027104	2408.33	1.12577	0.26487	4.25028	2.135e-05	0.00185196	Atf2
ENSMUSG00000063229	81387.1	1.5267	0.360049	4.24026	2.23265e-05	0.00190402	Ldha
ENSMUSG00000029328	12002.1	1.09508	0.258852	4.23054	2.33136e-05	0.00192019	Hnrnpdl
ENSMUSG00000020649	13323.6	1.57481	0.37505	4.19894	2.68173e-05	0.00214256	Rrm2
ENSMUSG00000047867	994.364	1.01022	0.242338	4.16864	3.06417e-05	0.00238534	Gimap6
ENSMUSG00000024922	37.8772	2.07782	0.499203	4.16228	3.15091e-05	0.00244035	Ovol1
ENSMUSG00000026475	43.127	2.44856	0.589291	4.1551	3.25147e-05	0.00249279	Rgs16
ENSMUSG00000044533	34013.8	1.14206	0.275309	4.1483	3.34947e-05	0.00255502	Rps2
ENSMUSG00000020309	411.401	1.08437	0.262333	4.13356	3.57186e-05	0.00266178	Chac2
ENSMUSG00000021025	2417.64	1.31039	0.318587	4.11313	3.90336e-05	0.00285479	Nfkbia
ENSMUSG00000035270	26.5463	2.54208	0.618282	4.11153	3.9305e-05	0.00285479	Impg2
ENSMUSG00000024975	2085.24	1.04778	0.254775	4.11255	3.91313e-05	0.00285479	Pdcd4
ENSMUSG00000019487	474.599	1.46508	0.356924	4.10474	4.04778e-05	0.00292442	Trip10
ENSMUSG00000043284	3116.92	1.19018	0.290579	4.09588	4.20575e-05	0.00301147	Tmem11
ENSMUSG00000071470	45.3208	1.97714	0.483188	4.09186	4.27927e-05	0.00304434	Ccnb1ip1
ENSMUSG00000038069	806.92	1.43133	0.350322	4.08575	4.39346e-05	0.0030734	Cdkn2aip
ENSMUSG00000026687	502.77	1.42055	0.348357	4.07785	4.54541e-05	0.00313632	Aldh9a1
ENSMUSG00000027510	127.634	1.61017	0.394667	4.07982	4.50707e-05	0.00313632	Rbm38
ENSMUSG00000006398	6545.06	1.54335	0.378454	4.07805	4.54158e-05	0.00313632	Cdc20
ENSMUSG00000029580	35577.3	1.18042	0.289547	4.0768	4.56606e-05	0.00313632	Actb
ENSMUSG00000025950	4016.18	1.42262	0.349046	4.07574	4.58691e-05	0.00313645	Idh1
ENSMUSG00000041957	208.905	1.25563	0.30835	4.07207	4.65965e-05	0.0031719	Pkp2
ENSMUSG00000028060	1693.3	1.09172	0.268294	4.0691	4.71942e-05	0.00318403	Khdc4
ENSMUSG00000053461	20.5952	2.832	0.70226	4.03269	5.51411e-05	0.00356188	Hhipl2
ENSMUSG00000027562	3527.52	1.02829	0.255172	4.02979	5.58273e-05	0.00359093	Car2
ENSMUSG00000020277	894.1	1.21474	0.30183	4.02459	5.70756e-05	0.00365573	Pfkl
ENSMUSG00000021069	661.599	1.19431	0.297146	4.01927	5.83781e-05	0.00372344	Pygl
ENSMUSG00000021337	16.4418	3.14904	0.787394	3.99932	6.35247e-05	0.0039718	Scgn
ENSMUSG00000058672	382.801	1.80343	0.4511	3.99784	6.39241e-05	0.0039718	Tubb2a
ENSMUSG00000037266	4012.25	1.09799	0.274938	3.99357	6.50847e-05	0.0040162	Rsrp1
ENSMUSG00000017677	2459.84	1.30181	0.327322	3.97715	6.97458e-05	0.00423497	Wsb1
ENSMUSG00000063550	1384.52	0.991355	0.250163	3.96284	7.4064e-05	0.00440899	Nup98
ENSMUSG00000030161	765.016	1.199	0.302759	3.96024	7.48732e-05	0.00443975	Gabarapl1
ENSMUSG00000053774	1553.52	0.989561	0.250381	3.95222	7.74294e-05	0.00453814	Ubxn7
ENSMUSG00000023235	735.384	1.04473	0.264525	3.94948	7.83221e-05	0.00457281	Ccl25
ENSMUSG00000020038	423.021	1.09139	0.276748	3.94362	8.0261e-05	0.0046247	Cry1
ENSMUSG00000064181	1477.89	1.24704	0.316212	3.94369	8.02378e-05	0.0046247	Rab3ip
ENSMUSG00000021957	2914.08	1.1394	0.288959	3.94312	8.04296e-05	0.0046247	Tkt
ENSMUSG00000001349	21.6246	2.35258	0.596302	3.94529	7.97036e-05	0.0046247	Cnn1
ENSMUSG00000038235	772.899	1.25184	0.31855	3.92981	8.50117e-05	0.00483325	F11r
ENSMUSG00000037159	14.2041	3.31126	0.845779	3.91505	9.03862e-05	0.00505263	Wee2
ENSMUSG00000021273	1316.44	1.29617	0.331107	3.91465	9.05347e-05	0.00505263	Fdft1
ENSMUSG00000025316	904.715	1.11644	0.285271	3.91361	9.09278e-05	0.00505598	Banp
ENSMUSG00000107951	59.7901	1.91391	0.489498	3.90993	9.23217e-05	0.00509616	Gm6210
ENSMUSG00000062825	18796.7	1.50738	0.385508	3.91012	9.22509e-05	0.00509616	Actg1
ENSMUSG00000069135	2501.99	1.23565	0.316175	3.90813	9.3014e-05	0.00511577	Cep43
ENSMUSG00000042515	1128.04	1.02692	0.263097	3.90319	9.49339e-05	0.00520252	Pwwp3b
ENSMUSG00000036427	4918.38	1.41099	0.362142	3.89623	9.77021e-05	0.00531583	Gpi1
ENSMUSG00000000078	1501.68	1.01752	0.261216	3.89531	9.80726e-05	0.00531694	Klf6
ENSMUSG00000024563	1766.37	1.2438	0.319426	3.89387	9.86556e-05	0.00532951	Smad2
ENSMUSG00000031367	330.465	1.12546	0.291081	3.86649	0.000110412	0.00590157	Ap1s2
ENSMUSG00000098008	22.1621	2.36605	0.612256	3.86447	0.00011133	0.0059298	A930001A20Rik
ENSMUSG00000025094	139.271	1.53455	0.397373	3.86174	0.000112582	0.00595467	Slc18a2
ENSMUSG00000023015	3227.84	1.29965	0.337216	3.85406	0.000116176	0.00608121	Racgap1
ENSMUSG00000022003	236.333	1.0955	0.284358	3.85254	0.000116898	0.00609799	Slc25a30
ENSMUSG00000024767	5187.76	1.06701	0.277212	3.84908	0.000118562	0.00616361	Otub1
ENSMUSG00000057836	87.8807	1.79579	0.469438	3.8254	0.000130558	0.00667299	Xlr3a
ENSMUSG00000009470	2732.68	1.00272	0.262514	3.81967	0.000133628	0.0067842	Tnpo1
ENSMUSG00000050199	592.295	1.15498	0.302568	3.81724	0.000134954	0.006806	Lgr4
ENSMUSG00000062098	359.045	0.965984	0.253046	3.81742	0.000134853	0.006806	Btbd3
ENSMUSG00000110218	22.1968	2.28556	0.599012	3.81554	0.000135885	0.00683024	Tincr
ENSMUSG00000031925	354.167	1.04496	0.274107	3.81222	0.000137723	0.00688565	Maml2
ENSMUSG00000015839	1353.81	1.08954	0.286656	3.80087	0.000144188	0.00702906	Nfe2l2
ENSMUSG00000004837	145.071	1.26154	0.332038	3.79938	0.000145056	0.00703497	Grap
ENSMUSG00000029657	2084.22	1.0591	0.279074	3.79506	0.000147606	0.00710338	Hsph1
ENSMUSG00000047648	846.357	1.1635	0.306682	3.79384	0.000148338	0.00710338	Fbxo30
ENSMUSG00000007564	3517.97	1.40355	0.370637	3.78685	0.000152568	0.00721488	Ppp2r1a
ENSMUSG00000001525	75114	1.33284	0.352996	3.77578	0.000159507	0.00748851	Tubb5
ENSMUSG00000022403	8159.77	1.12498	0.298316	3.77112	0.000162519	0.00759088	St13
ENSMUSG00000030752	239.057	1.51515	0.402124	3.76787	0.000164645	0.00764315	Kdm8
ENSMUSG00000025372	157.149	1.51326	0.402069	3.76368	0.00016743	0.00770177	Baiap2
ENSMUSG00000024131	28.2723	2.14874	0.571668	3.75873	0.00017078	0.00783216	Slc3a1
ENSMUSG00000004880	1650.55	0.828122	0.221519	3.73838	0.00018521	0.00834271	Lbr
ENSMUSG00000037204	2474.17	1.28091	0.342631	3.73846	0.000185148	0.00834271	Atg101
ENSMUSG00000031349	1968.9	1.25232	0.335701	3.73046	0.000191132	0.00849586	Nsdhl
ENSMUSG00000029169	4363.99	0.928408	0.249215	3.72533	0.000195058	0.00854193	Dhx15
ENSMUSG00000039197	4340.38	1.09479	0.293896	3.72507	0.00019526	0.00854193	Adk
ENSMUSG00000015837	2482.9	1.4073	0.377869	3.72431	0.000195847	0.00854298	Sqstm1
ENSMUSG00000023039	498.748	1.18178	0.318041	3.7158	0.000202563	0.00878881	Krt7
ENSMUSG00000040423	1285.56	0.940471	0.253667	3.7075	0.000209314	0.00897567	Rc3h1
ENSMUSG00000037892	239.087	1.08915	0.29493	3.69289	0.000221719	0.00935082	Pcdh18
ENSMUSG00000114733	390.181	1.42966	0.387142	3.69285	0.000221759	0.00935082	Gm4815
ENSMUSG00000034158	1422.86	0.980374	0.265613	3.69099	0.000223385	0.00936734	Lrrc58
ENSMUSG00000026103	628.111	0.933459	0.253022	3.68924	0.000224923	0.00936988	Gls
ENSMUSG00000071533	2490.01	1.15548	0.313238	3.68883	0.000225285	0.00936988	Pcnp
ENSMUSG00000037253	641.449	0.9277	0.25149	3.68882	0.000225297	0.00936988	Mex3c
ENSMUSG00000020917	2538.1	0.922878	0.250327	3.6867	0.000227184	0.00942254	Acly
ENSMUSG00000027329	79.7299	1.38502	0.376814	3.67562	0.000237273	0.0097346	Spef1
ENSMUSG00000022419	184.785	1.27354	0.34698	3.67036	0.000242204	0.00985701	Deptor
ENSMUSG00000012443	853.9	1.12105	0.30538	3.67099	0.000241611	0.00985701	Kif11
