# Supplementary material for: Glycolytic flux-signaling controls mouse embryo mesoderm development
Source: eLife. 2022 Dec 5;11:e83299. doi: 10.7554/eLife.83299 (PMC9771359; doi:10.7554/eLife.83299)
Supplement: Supplementary file 6. [file elife-83299-supp6.xlsx]

## Sheet: GOTerm_F6P_Up
GO-terms that were enriched in up-regulated DEGs in F6P-treated explants
Term	Description	Count	FDR
GO:0016126	sterol biosynthetic process	6	0.00205816
GO:0006695	cholesterol biosynthetic process	6	0.00449386
